# Supplementary material
Source: PubMed Central journal article supplement (PMC7598066)
Supplement: jci-130-136363-s235.pdf [file jci-130-136363-s235.pdf]

## Supplemental Material and Methods

**Animals:** For global Dusp8 KO mice excision of exons 5 and 6 includes all Dusp8 transcript variants currently listed as NCBI reference sequences, and suggests that Dusp8 functionality is completely ablated from our KO model.

For generating the Dusp8 conditional knockout line, the Dusp8<sup>tm1a</sup>(EUCOMM)Hmgu embryonic stem (ES) cell clone HEPD0822-2-A10 was obtained from the European Mammalian Mutant Cell Repository (EUCOMM). The ES cells harbor a KO first allele (reporter-tagged insertion with conditional potential) of Dusp8 containing a Frt-flanked LacZ reporter and neomycin selection cassette in intron 2 and a LoxP-flanked exon 3. To generate chimeric animals, ES cells were injected into albino BALB/c (Charles River, Germany) derived blastocysts and transferred to pseudo pregnant foster mothers. Male chimeras were bred to wild type C57BL/6N females to obtain germline transmission. To convert the KO first allele (tm1a) into a conditional KO allele (tm1c) F2 animals were bred to Gt(ROSA)<sup>26Sortm1</sup>(FLP1)<sup>Dym</sup> (MGI:2429412). The Flp-recombinase mediated removal of the LacZ reporter and neomycin selection cassette was confirmed and positive animals subsequently backcrossed to C57BL/6J wild type breeders to remove the tm1(FLP1)<sup>Dym</sup> expression allele.

**Metabolic studies:** Food intake, energy expenditure, respiratory exchange ratio and locomotor activity were analyzed by a custom-made 32-cage calorimetry system (TSE Systems, Bad Homburg, Germany). Prior to data collection, all mice were acclimatized to the calorimetry system for 24 h.

**Assessment of leptin sensitivity:** To assess biochemical responses to leptin stimulation, leptin was administered intraperitoneally at a dose of 3 mg/kg BW (R & D system, Minneapolis, MN, USA) in age-matched DIO WT and Dusp8 KO littermates. Control mice received vehicle phosphate buffered saline (PBS) instead. Mice were sacrificed 30 min after leptin administration by CO<sub>2</sub> followed by perfusions and measurement of signal transduction markers by immunohistochemistry.

To assess the effect of leptin stimulation on food intake, HFD-fed Dusp8 WT and KO males were fasted 3 hours prior to the dark cycle. 30 min prior the dark cycle, mice were injected intraperitoneally with 5 mg/kg leptin or PBS. At the start of the dark cycle, all mice were allowed to eat, and food intake was measured throughout the dark and subsequent light period.

**Adeno-associated virus (AAV) infusion in mice:** Surgeries were performed using a mixture of ketamine and xylazine (100 mg/kg and 7 mg/kg, respectively) as anesthetic agents and Metamizol (50 mg/kg s.c.) and Meloxicam (1mg/kg, s.c., for 3 days postoperatively) for analgesia. Stereotaxic coordinates were -1.5 mm posterior and -0.3 mm lateral to bregma, and -5.8 mm ventral from the dura. Fluorescence microscopy of hypothalamus slices confirmed GFP expression in a restricted area of the mediobasal hypothalamus. Overexpression of Dusp8 was confirmed by qPCR from whole hypothalami; two weeks after AAV administration, Dusp8 mRNA levels were increased 4.2 fold.

**Islet isolation and insulin secretion assay:** Mouse islets were isolated by collagenase digestion as previously described (1). Equal-number batches of islets were washed twice with HEPES-balanced Krebs-Ringer (KRH) bicarbonate buffer supplemented with 0.2% (weight for volume) BSA and 2 mmol/L glucose. The islets were starved in the same buffer for 1 h at 37°C. Later, starvation buffer was aspirated, and islets were incubated in KRH bicarbonate buffer with 16.5 mM glucose for 1 h at 37°C. Thereafter, the supernatants were collected and centrifuged at 760x g for 5 min for determination of insulin concentration using a mouse ultrasensitive insulin ELISA kit (Alpco). Following the secretion assay, islets were washed twice with Dulbecco's PBS, and ice-cold RIPA lysis buffer was added. Islet homogenates were collected, centrifuged at 12,000x g for 10 min, and assayed for total insulin content by radioimmunoassay. For normalization, DNA content was measured using the Quant-it Pico Green DNA assay kit (Invitrogen). Each independent experiment was performed with three technical replicates.

**Catecholamine turnover rate determination:** Age matched DIO WT and Dusp8 KO littermates (6-months-old) were subjected to 3 h of fasting one hour after the onset of the light phase. Subsequently, WT and Dusp8 KO mice were injected intraperitoneally either with saline or with 200 mg/kg body weight  $\alpha$ -MPT. Tissues were removed 3 h after injection and flash frozen in liquid nitrogen and stored at -80°C for further analyses. Because the concentration of catecholamine in tissues declined exponentially, we could obtain the rate constant of NE efflux (expressed in  $h^{-1}$ ).

Comprehensive analysis of monoamines and metabolites was carried out by reverse-phase liquid chromatography with electrochemical detection as described by Nagler et al. (2). The values obtained were expressed as pg/mg wet tissue. The values for the tissue levels of NE and dopamine were logarithmically

transformed for calculation of linearity of regression, standard error of the regression coefficients and significance of differences between regression coefficients.

**Dex/CRH test:** Seven days before the actual test, a blood sample was taken from the tail of the animals at 3 p.m. in order to get a basal reference value ('untreated'). On the day of testing, the mice received an intraperitoneal injection of Dex at 9 a.m. (0.05 mg/kg BW, Dexa-ratiopharm, Ratiopharm GmbH, Ulm, Germany), followed by an injection of CRH at 3 p.m. (0.15 mg/kg BW, CRH Ferring Arzneimittel GmbH, Kiel, Germany). Immediately before CRH injection, a tail blood sample was collected as described above ('after Dex' value) and a second one 30 min later ('after CRH' value). Plasma samples were stored at -20°C and plasma corticosterone concentrations were measured as described below.

**Immunohistochemistry and Immunofluorescence:** Mice were euthanized in CO<sub>2</sub> and perfused with saline, followed by a solution of 4% paraformaldehyde in 0.1 M PBS (pH 7.4) cooled to 4°C. Brains were removed and kept in fixative at 4°C for 6 h or overnight post-fixation, then equilibrated for 48 h with 30% sucrose in 0.1 M Tris-buffered saline (TBS; pH 7.2). Brains were cut coronally in a cryostat into 30 µm sections; sections used for immunohistochemistry were collected and rinsed in 0.1 M TBS. For immunostaining, sections were sequentially pretreated with 1% NaOH with 1% H<sub>2</sub>O<sub>2</sub> solution, 0.3% glycine, and 0.3% SDS, and blocked with SUMI (0.25% gelantine, 0.5% TritonX-100 in TBS pH 7.6). Subsequently, sections were incubated overnight with primary antibody (**Supplemental Table 4**) in SUMI at 4°C. After several TBS washes, sections were incubated with secondary antibody (**Supplemental Table 4**) diluted in SUMI.

For immunohistochemistry, another round of TBS washes was followed by amplification of the signal using the avidine-biotin conjugates, and subsequent DAB-H<sub>2</sub>O<sub>2</sub> staining for 10 min. Sections were washed with TBS, mounted on gelatin-pre-coated glass slides, and kept for air-drying. Dried sections were further dehydrated by immersion in a series of alcohol (50-100%) followed by two incubation steps with 100% xylene before being mounted with a coverslip using mounting solution. Images were captured by a BZ-9000 microscope (Keyence Corporation Itasca, IL, USA).

Immunofluorescent stainings were captured at the Leica TCS SP5 confocal laser scanning microscope (Leica microsystems, Wetzlar, Germany). Fluorophores were excited using 405 diode, 488 argon and DPSS 561 laser lines. Fluorescence was detected using PMT and hybrid detectors. Identical acquisition settings were

used for all images recorded. Fluorescence images were analyzed using the ImageJ based software Fiji (Fiji Is Just ImageJ) (3).

Cells were either manually counted in a blinded fashion or the activation scoring of astrocytosis and microgliosis images was applied as described previously (4). Per mouse 2 brain sections were analysed and averaged. The ARC was defined by drawing a region of interest (ROI) based on the DAPI staining and the known structure of the ARC. Average fluorescence intensity of the ROI was measured and activation scores were assigned in a blinded fashion.

**In situ hybridization:** The hybridization was performed as described previously (5): The frozen sections were fixed with 4% paraformaldehyde in 0.1 M phosphate buffer (pH 7.4) at room temperature for 30 min. They were then dehydrated using 70, 80, 90, and 95%, and absolute ethanol (5 min each). The hybridization was performed overnight at 45°C in a moist chamber. Hybridization solution contained 1x 10<sup>6</sup> cpm per slide of the labeled probe, 4x standard saline citrate (SSC), 50% deionized formamide, 1x Denhardt's solution, 10% dextran sulfate, and 10 µg/ml sheared, single-stranded salmon sperm DNA. Afterward, the hybridization sections were sequentially washed in 1x SSC at room temperature, four times in 1x SSC at 42°C (30 min/wash), and once in 1x SSC at room temperature (1 h), and then rinsed in water and ethanol. Finally, the sections were air-dried and exposed to Hyperfilm β-Max (Amersham Intl., Little Chalfont, UK) at room temperature for 3 weeks. The slides were then developed in Kodak D-19 developer (Eastman Kodak Co., Rochester, NY) and fixed (Kodak fixer).

**Protein extraction and concentration determination:** Cells and murine tissues (whole hypothalamus or 30-50 mg tissue) were lysed in RiPa buffer (Sigma-Aldrich, Darmstadt, Germany) containing 1x protease phosphatase inhibitor cocktail (Promega). Lysates were sonicated 2x 5 sec and then rotated at 4°C for 30 min. After centrifugation at 10,000x g for 10 min, protein concentrations of the supernatants were determined using the bicinchoninic acid (BCA) kit from Pierce (Rockford, IL) following the manufacturer's instructions.

**Western blotting analysis:** Protein lysates were prepared as described above. Protein samples of equal concentration were mixed with 4x NuPage sample buffer and subjected to SDS-PAGE. The separated proteins were then electrophoretically transferred onto a PVDF membrane. The membrane was blocked for 1



h in a 5% BSA/TBS-T solution, and then incubated in the presence of the primary antibody (**Supplemental Table 4**) overnight at 4°C. The washed membrane was then incubated with the secondary antibody (**Supplemental Table 4**) for 1 h at RT. Chemiluminescence was developed with the Clarity Western ECL Substrate (BioRad, Germany) and exposed to autoradiographic film (Life technologies GmbH, Darmstadt, Germany) or detected on a Li-Cor Odyssey instrument (Li-Cor Bioscience, Lincoln, NE, USA). Densitometric quantifications were performed using ImageJ 1.47v software (<https://imagej.nih.gov/ij/docs/guide/user-guide.pdf>).

**Phosphoproteomics:** Flash-frozen hypothalami of global Dusp8 WT and KO males were processed for protein extraction, digestion and phospho-peptide enrichment as follows. 475 µg of protein was heated for 5 min at 95 °C, and sonicated (Diagenode Bioruptor Plus, high intensity, 10x 30s ON / 30s OFF) in 4% SDC (sodium deoxycholate), 100 mM Tris pH 8.5. After alkylation and reduction with 10 mM tris-(2-carboxyethyl)-phosphin-hydrochlorid (TCEP), 40 mM 2-chloroacetamide (CAA), proteins were digested over night with 1:100 (enzyme:protein) LysC and Trypsin at 37 °C. Peptides were acidified with trifluoroacetic acid (TFA) to a final concentration of 1% (v/v) and stored at -20°C before phosphopeptide enrichment using the Easyphos protocol (6).

For MS analysis peptides were loaded onto a 50-cm column at 60 °C with a 75 µM inner diameter, packed in-house with 1.9 µM C18 ReproSil particles (Dr. Maisch GmbH). Peptides were separated by reversed-phase chromatography using a binary buffer system consisting of 0.1% formic acid (buffer A) and 80% ACN in 0.1% formic acid (buffer B). MS data were acquired on a Thermo Orbitrap Exploris 480 mass spectrometer equipped with a FAIMS Pro device. Acquisition was performed using a data-dependent 1 sec cycle time method with a maximum injection time of 100 ms, a scan range of 300–1650 Th, and an AGC target of 300%. Compensation voltages (CVs) of -50 and -70 were used for intra-analysis CV switching. Sequencing was performed via higher energy collisional dissociation fragmentation with a target value of 1e5, and a window of 1.4 Th. Survey scans were acquired at a resolution of 60,000. Resolution for HCD spectra was set to 15,000 with a maximum ion injection time of 100 ms, and an underfill ratio of 40%. Dynamic exclusion was set to 30 s, and apex trigger was enabled.

Raw mass spectrometry data were processed with MaxQuant version 1.6.14.0 with “match between runs” enabled. “Max. missed cleavages” were set to 4. Default settings were used if not stated otherwise.

**Laser-capture microdissection microscopy:** Cut sections were directly mounted on polyethylene naphthalate membrane frame slides from Applied Biosystems and stored at  $-80^{\circ}\text{C}$ . In total, the arcuate nuclei of 16 hypothalamic slides per animal were excised and collected by using a Leica laser capture microdissection microscope. Microdissected tissues were processed for RNA isolation using the Arcturus® Paradise kit (#KIT0312I, Life technologies GmbH, Darmstadt, Germany). In brief, sections were first treated with proteinase K followed by binding of RNA to the column, DNA digestion, washing and finally elution of RNA in small amounts of bidestH<sub>2</sub>O. RNA quality and quantity were analyzed by nanodrop. Equal amounts of RNA were translated to cDNA using Superscript III (#18080093, Invitrogen, Darmstadt, Germany) reverse transcriptase.

**Microarray analysis:** Total RNA (2 ng, RIN>7) was amplified using the Ovation PicoSL WTA System V2 in combination with the Encore BiotinIL Module (Nugen). 750 ng of amplified cDNA was hybridised to Mouse Ref-8 v2.0 Expression BeadChips (Illumina, San Diego, CA, USA). Staining and scanning were done according to the Illumina expression protocol. Data was processed using the GenomeStudioV2010.1 software (gene expression module version 1.6.0) in combination with the MouseRef-8\_V2\_0\_R3\_11278551\_A.bgx annotation file, which was manually updated. The background subtraction option was used and an offset to remove remaining negative expression values was introduced. CARMAweb (7) was used for quartile normalisation. Statistical analyses were performed by utilizing the statistical programming environment R (8) implemented in CARMAweb. A set of 893 significantly regulated genes was defined by the following criteria: limma *t*-test *p*-value <0.05, linear fold-change>1.3x, and detection *p*-value <0.05 in at least half of the samples in at least one group (**Supplemental Table 2**). MAPK signaling heatmap was done in R and pathway enrichment analyses were generated through the use of QIAGEN's Ingenuity Pathway Analysis (IPA®, QIAGEN Redwood City, [www.qiagen.com/ingenuity](http://www.qiagen.com/ingenuity)). Fisher's Exact Test *p*-value <0.05 was used as criteria for significance and selected terms are shown in **Fig. 6D**.

**RNA isolation and qPCR analysis:** RNA was isolated from murine tissues using a commercially available kit (NucleoSpin RNA, #740955, Macherey-Nagel, Düren, Germany). For qPCR analyses, equal amounts of RNA were transcribed to cDNA using the QuantiTect Reverse Transcription Kit (#205313, Qiagen, Hilden, Germany). RNA from the formalin-fixed, paraffin-embedded (FFPE) human brain tissue was isolated with the RNeasy FFPE Kit (#73504, Qiagen) and reverse transcribed into cDNA using the high-capacity cDNA

Reverse Transcription Kit (#4368814, Applied Biosystems, Darmstadt, Germany). Gene expression was analyzed using either TaqMan probes (#4331182, Applied Biosystems; **Supplemental Table 5**) or custom-made primers (Sigma-Aldrich; **Supplemental Table 6**) and the respective TaqMan (#4440040) or SYBR green mastermixes (#4367659, Applied Biosystems). qPCRs were carried out using a ViiA™ 7 Real Time PCR System (Applied Biosystems). Gene expression was evaluated using the  $\Delta\Delta\text{-C}_T$  method and HPRT, RPL127, PPIB or GAPDH was used as housekeeping gene.

### References for Supplemental methods:

1. Carter JD, Dula SB, Corbin KL, Wu R, and Nunemaker CS. A practical guide to rodent islet isolation and assessment. *Biol Proced Online*. 2009;11(3-31).
2. Nagler J, Schriever SC, De Angelis M, Pfluger PT, and Schramm KW. Comprehensive analysis of nine monoamines and metabolites in small amounts of peripheral murine (C57Bl/6 J) tissues. *Biomed Chromatogr*. 2018;32(4):e4151.
3. Schindelin J, Arganda-Carreras I, Frise E, Kaynig V, Longair M, Pietzsch T, Preibisch S, Rueden C, Saalfeld S, Schmid B, et al. Fiji: an open-source platform for biological-image analysis. *Nat Methods*. 2012;9(7):676-82.
4. Harrison L, Pfuhlmann K, Schriever SC, and Pfluger PT. Profound weight loss induces reactive astrogliosis in the arcuate nucleus of obese mice. *Mol Metab*. 2019;24(149-55).
5. Nogueiras R, Lopez M, Lage R, Perez-Tilve D, Pfluger P, Mendieta-Zeron H, Sakkou M, Wiedmer P, Benoit SC, Datta R, et al. Bsx, a novel hypothalamic factor linking feeding with locomotor activity, is regulated by energy availability. *Endocrinology*. 2008;149(6):3009-15.
6. Humphrey SJ, Karayel O, James DE, and Mann M. High-throughput and high-sensitivity phosphoproteomics with the EasyPhos platform. *Nat Protoc*. 2018;13(9):1897-916.
7. Rainer J, Sanchez-Cabo F, Stocker G, Sturn A, and Trajanoski Z. CARMAweb: comprehensive R- and bioconductor-based web service for microarray data analysis. *Nucleic Acids Res*. 2006;34(Web Server issue):W498-503.
8. Team RDC. R: A language and environment for statistical computing. *R Foundation for Statistical Computing, Vienna, Austria*. 2011;ISBN 3-900051-07-0(URL <http://www.R-project.org>).

## Supplemental Figures and Legends

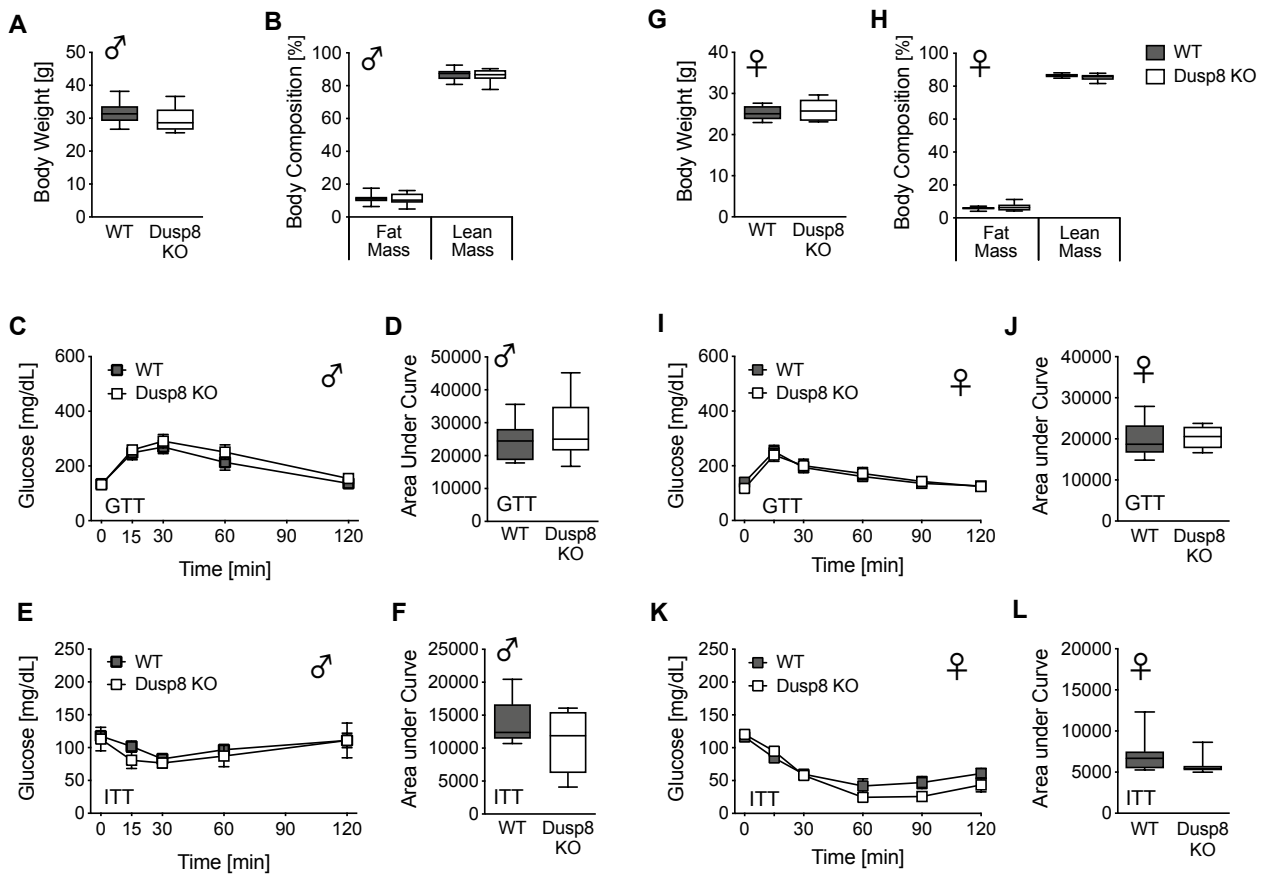

### Supplemental Figure 1: Unaltered body composition and glucose homeostasis in male and female Dusp8 KO mice on Chow diet.

Male Dusp8 WT (n=6) and KO (n=14) littermates were subjected to Chow feeding for 12 wks and evaluated for **A**) body weight and **B**) fat and lean mass. **C-F**) Glucose tolerance (GTT) and insulin tolerance tests (ITT) were carried out after 12 wks or 13 wks on Chow diet, respectively (n=6 WT, n=14 Dusp8 KO males).

Female Dusp8 WT (n=8) and KO (n=9) littermates were subjected to Chow feeding for 14 wks and evaluated for **G**) body weight and **H**) fat and lean mass. **I-L**) Glucose tolerance (GTT) and insulin tolerance tests (ITT) were carried out after 14 wks or 15 wks on Chow diet, respectively (n=8 WT, n=9 Dusp8 KO females).

Data are shown as box-and-whisker-plots (A,B,D,F-H,J,L) or as means  $\pm$  s.e.m. (C,E,I,K). Student's t-test (A,B,D,F-H,J,L) or Two-Way ANOVA (C,E,I,K).

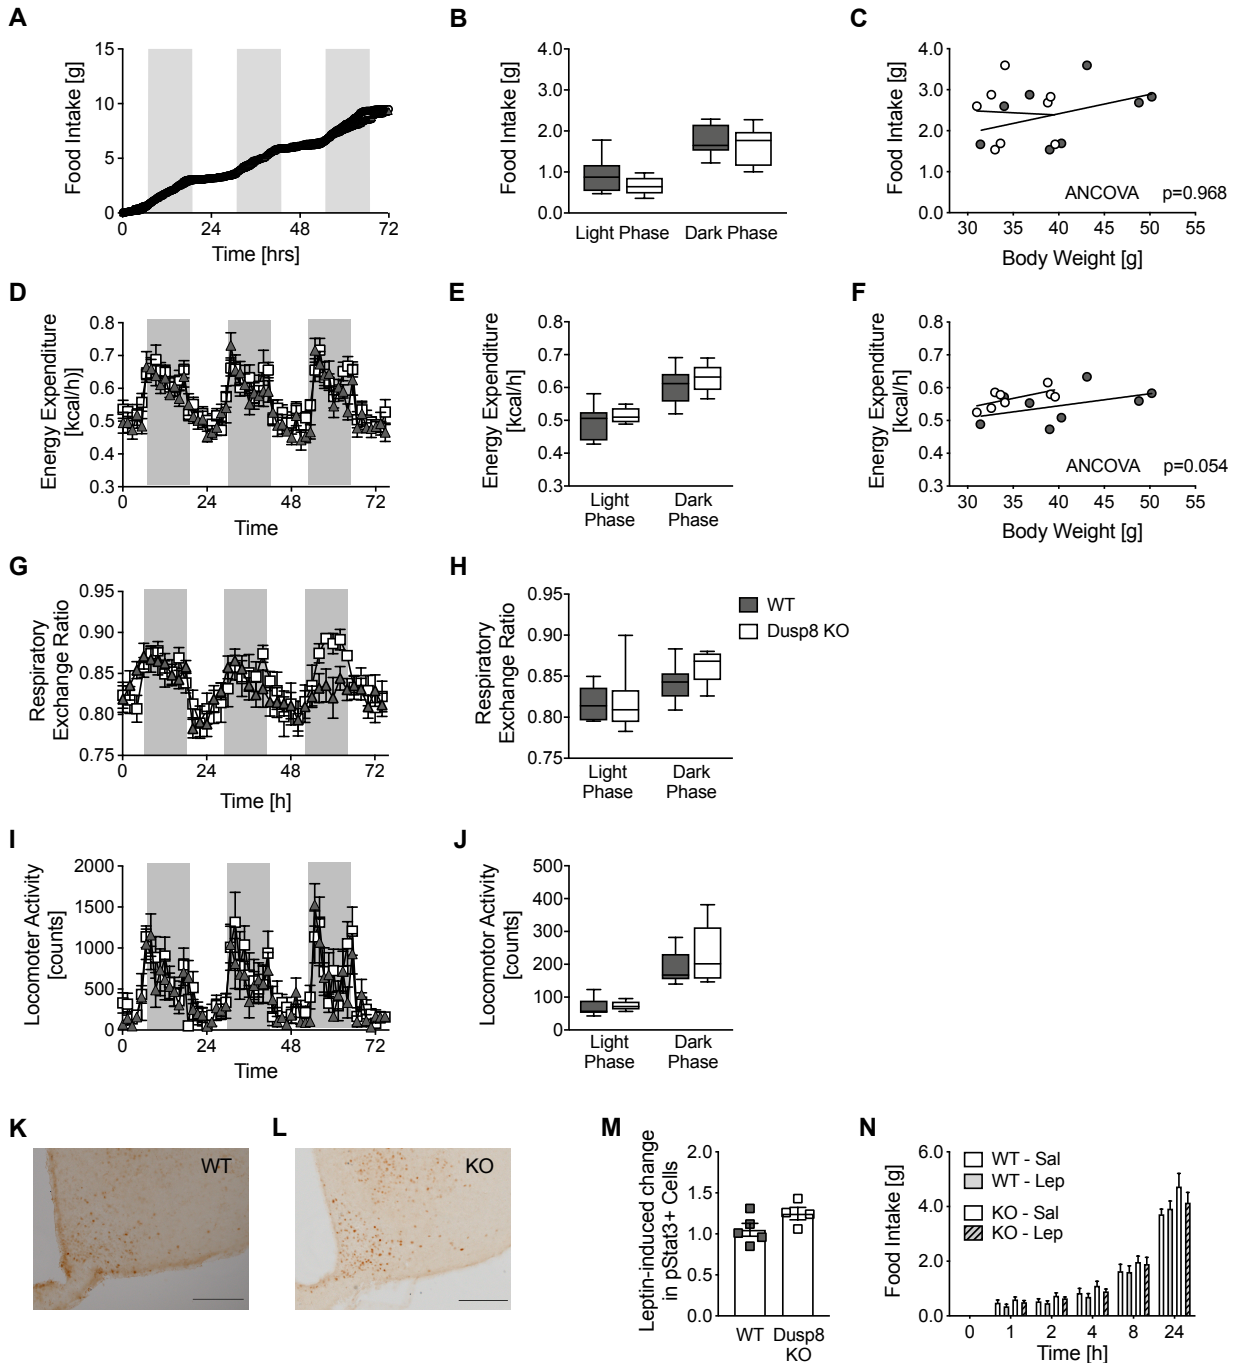

**Supplemental Figure 2: Dusp8 ablation does not affect food intake, energy expenditure, respiratory exchange ratio, locomotor activity or leptin sensitivity in male mice on HFD.**

**A)** Cumulative food intake, **B)** day and night food intake, **C)** average daily food intake relative to body weight, **D)** daily energy expenditure, **E)** day and night energy expenditure, **F)** average daily energy expenditure relative to body weight, **G)** respiratory exchange ratio (RER) over 3 days, **H)** average night and day RER, **I)** locomotor activity and **J)** average day and night locomotor activity were assessed in male Dusp8 KO mice compared to WT controls after 10 wks of HFD feeding (n=8 WT, n=8 Dusp8 KO) in indirect calorimetry chambers.

Representative immunohistochemical detection of leptin-induced Stat3 phosphorylation in hypothalamic slices of 18-wks-HFD-fed male **K)** WT and **L)** Dusp8 KO littermates following 30 min of treatment with a bolus ip injection of vehicle or 3 mg leptin / kg body weight. **M)** fold change in positively stained nuclei relative to vehicle (n=5 WT + Saline, n=5 WT + Leptin, n=4 Dusp8 KO + Saline, n=4 Dusp8 KO + Leptin). **N)** Food intake was measured over 24h after injection of leptin (5 mg/kg BW) or saline in Dusp8 KO males

and WT controls (n=7 WT + Saline, n=7 WT + Leptin, n=5 Dusp8 KO + Saline, n=5 Dusp8 KO + Leptin; 22 wks HFD feeding).

Data are shown as means  $\pm$  s.e.m. (A,D,G,I,N), as box-and-whisker-plots (B,E,H,J) or as scatter dot plots (C,F,M). Scale bar = 200  $\mu$ M. Two-Way ANOVA (A,D,G,I,N), Student's t-test (B,E,H,J,M) or ANCOVA (C,F).

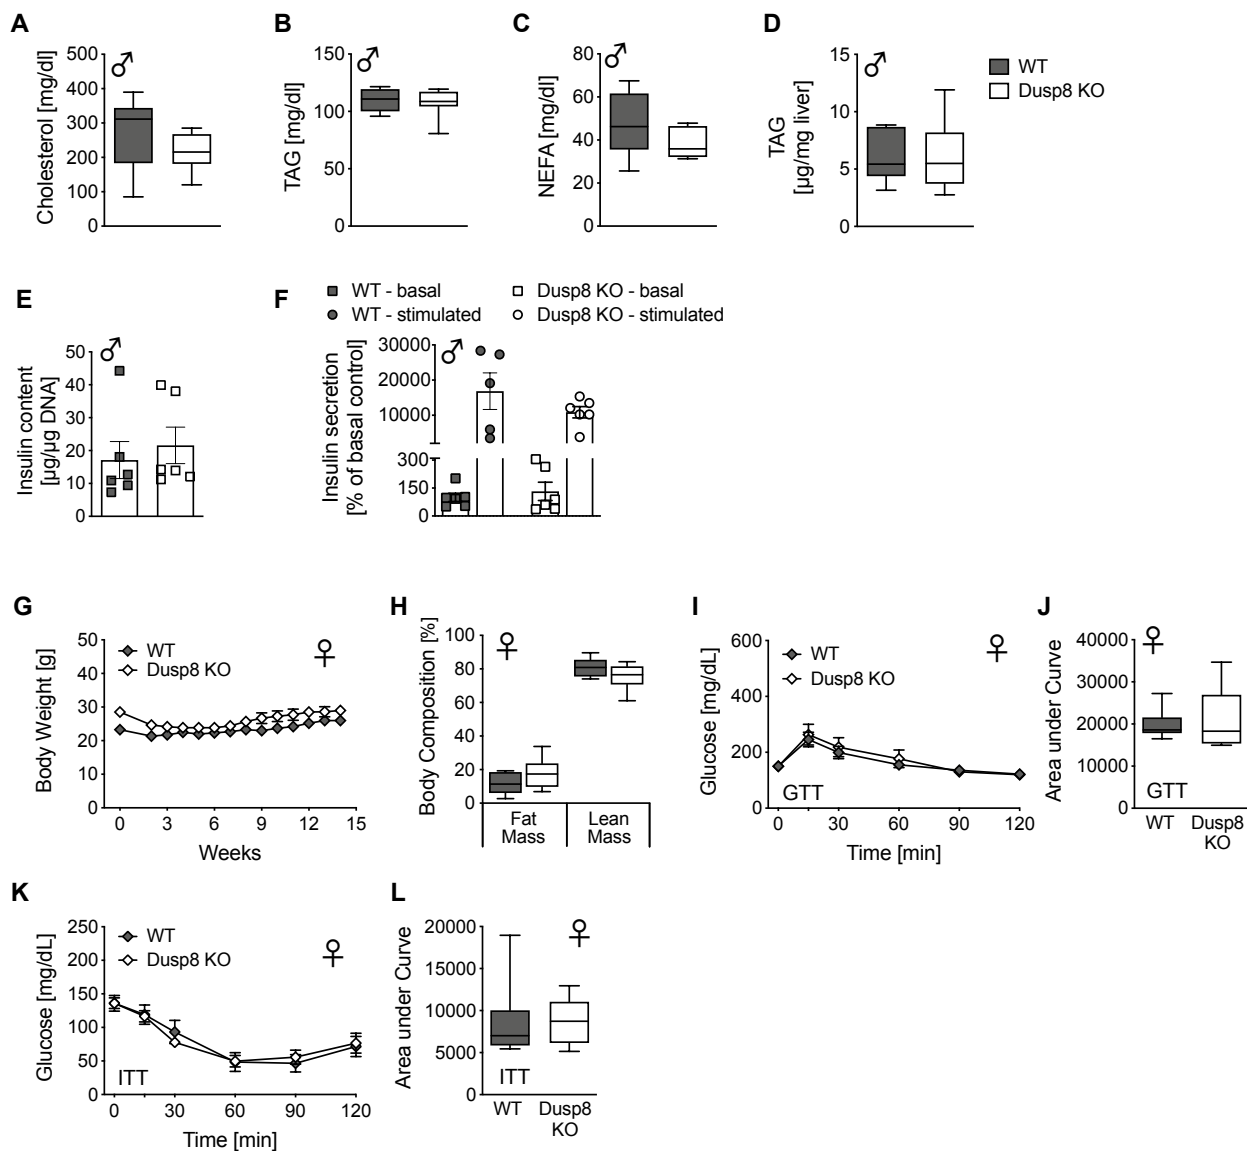

**Supplemental Figure 3: Dusp8 ablation has no effect on plasma lipid species and islet insulin secretion in HFD-fed male mice, or on body weight and glucose control in HFD-fed female mice.**

In male WT (n=6) and Dusp8 KO (n=7) mice plasma **A**) cholesterol, **B**) triglyceride, **C**) nonesterified fatty acid levels and **D**) hepatic triglyceride content were measured after 18 wks of HFD exposure. Ex vivo, **E**) insulin content and **F**) glucose-stimulated insulin secretion were measured in isolated islets of male Dusp8 WT or KO mice exposed to HFD feeding for 20 wks (n=6 each).

Female Dusp8 WT and KO mice were subjected to HFD feeding for 14 wks and evaluated for **G**) body weight gain and **H**) body composition and then subjected to **I-L**) glucose tolerance (GTT) and insulin tolerance tests (ITT) after 14 wks or 15 wks of HFD feeding, respectively (n=8 WT, n=8 Dusp8 KO females). Data are shown as box-and-whisker-plots (A-D,H,J,L), as scatter dot plots (E,F) or as means  $\pm$  s.e.m. (G,I,K). Student's t-test (A-E,H,J,L), One-Way ANOVA (F) or Two-Way ANOVA (G,I,K).

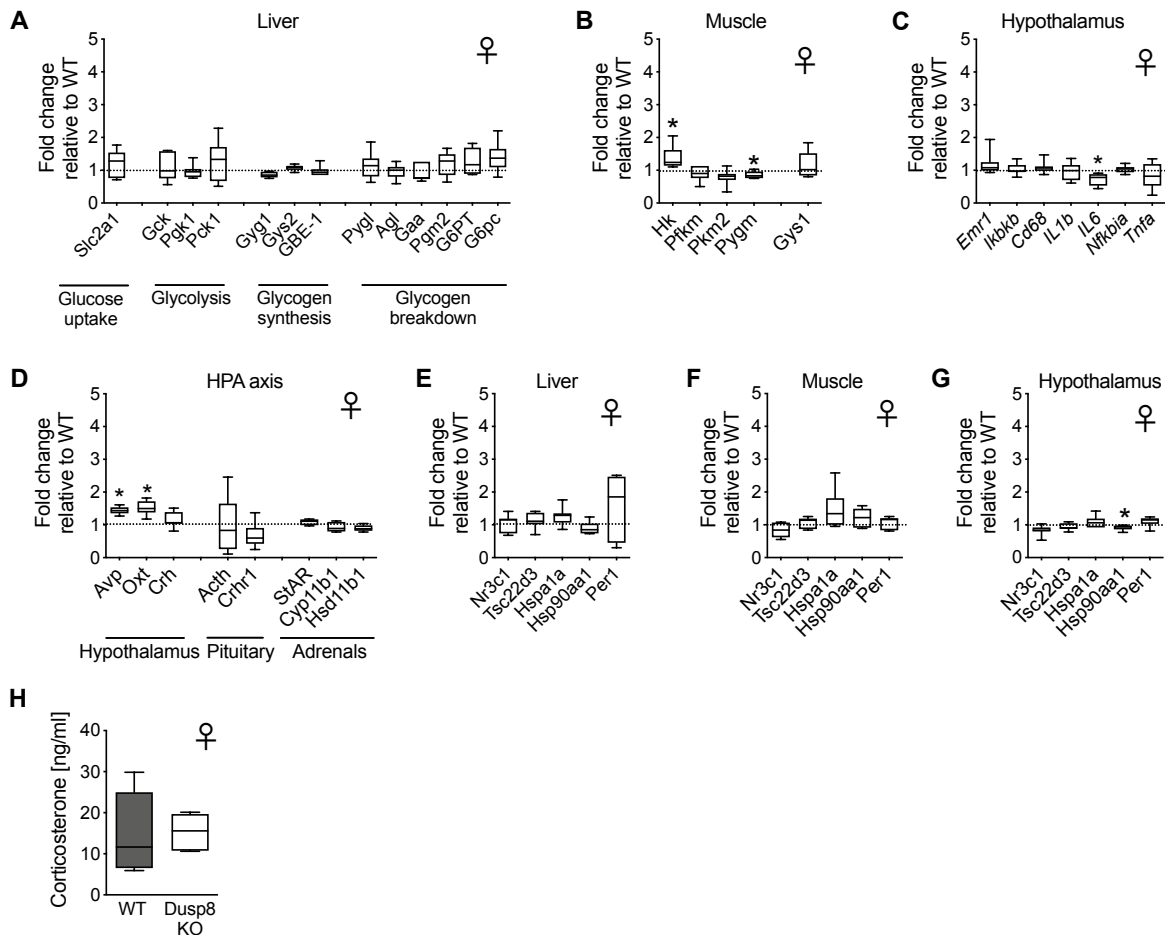

**Supplemental Figure 4: Ablation of Dusp8 does not affect peripheral glucose metabolism or glucocorticoid action in female mice on HFD.**

Gene expression analyses of **A,B**) glucoregulatory genes in the liver and quadriceps, **C**) inflammatory markers in the hypothalamus, of **D**) HPA axis-related genes in the hypothalamus, pituitary and adrenals and of **E-G**) glucocorticoid signalling-related targets in liver, quadriceps and hypothalamus taken from a cohort of Dusp8 WT and KO female mice after 15 weeks of HFD exposure (n=5 WT, n=6 KO). **H**) Plasma corticosterone levels were analysed in female mice after 15 weeks of HFD exposure, sacrificed under basal conditions at 9 am (n=6 WT, n=6 Dusp8 KO).

Data are shown as box-and-whisker-plots. \*p<0.05; Student's t-tests.

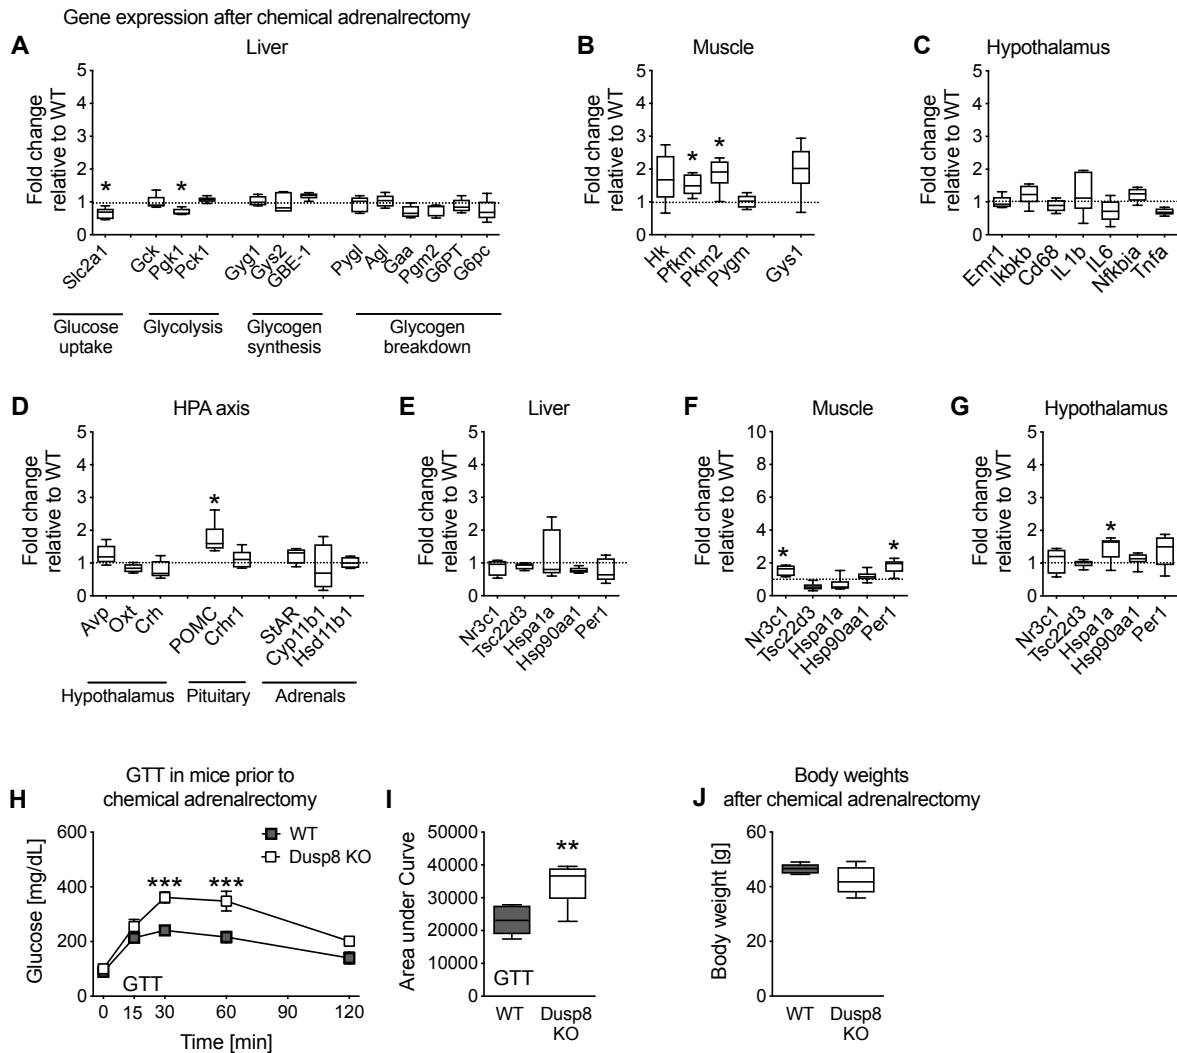

**Supplemental Figure 5: Chemical adrenalectomy abrogates expression changes of glucoregulatory genes and GR targets in HFD-fed Dusp8 KO mice.**

Gene expression analyses of glucoregulatory genes in **A)** liver and **B)** quadriceps, of inflammatory markers in **C)** hypothalamus, of HPA axis related genes in **D)** hypothalamus, pituitary and adrenals and of GR signalling-related targets in **E)** liver, **F)** quadriceps and **G)** hypothalamus taken from the metyrapone-treated cohort of Dusp8 WT (n=5, n=4 for adrenals) and KO (n=6, n=4 for adrenals) mice.

**H,I)** A glucose tolerance test was performed prior to metyrapone injections in Dusp8 WT (n=5) and KO (n=6) mice that had been exposed to HFD for 30 wks. **J)** Body weight of diet-induced obese Dusp8 WT and KO mice that had been treated with metyrapone for 14 days (n=5 WT, n=6 KO).

Data are shown as box-and-whisker-plots (A-G,I,J) or as means  $\pm$  s.e.m. (H). \*p<0.05, \*\*p<0.01 and \*\*\*p<0.001; Student's t-tests (A-G,I,J) or Two-Way ANOVA (H).



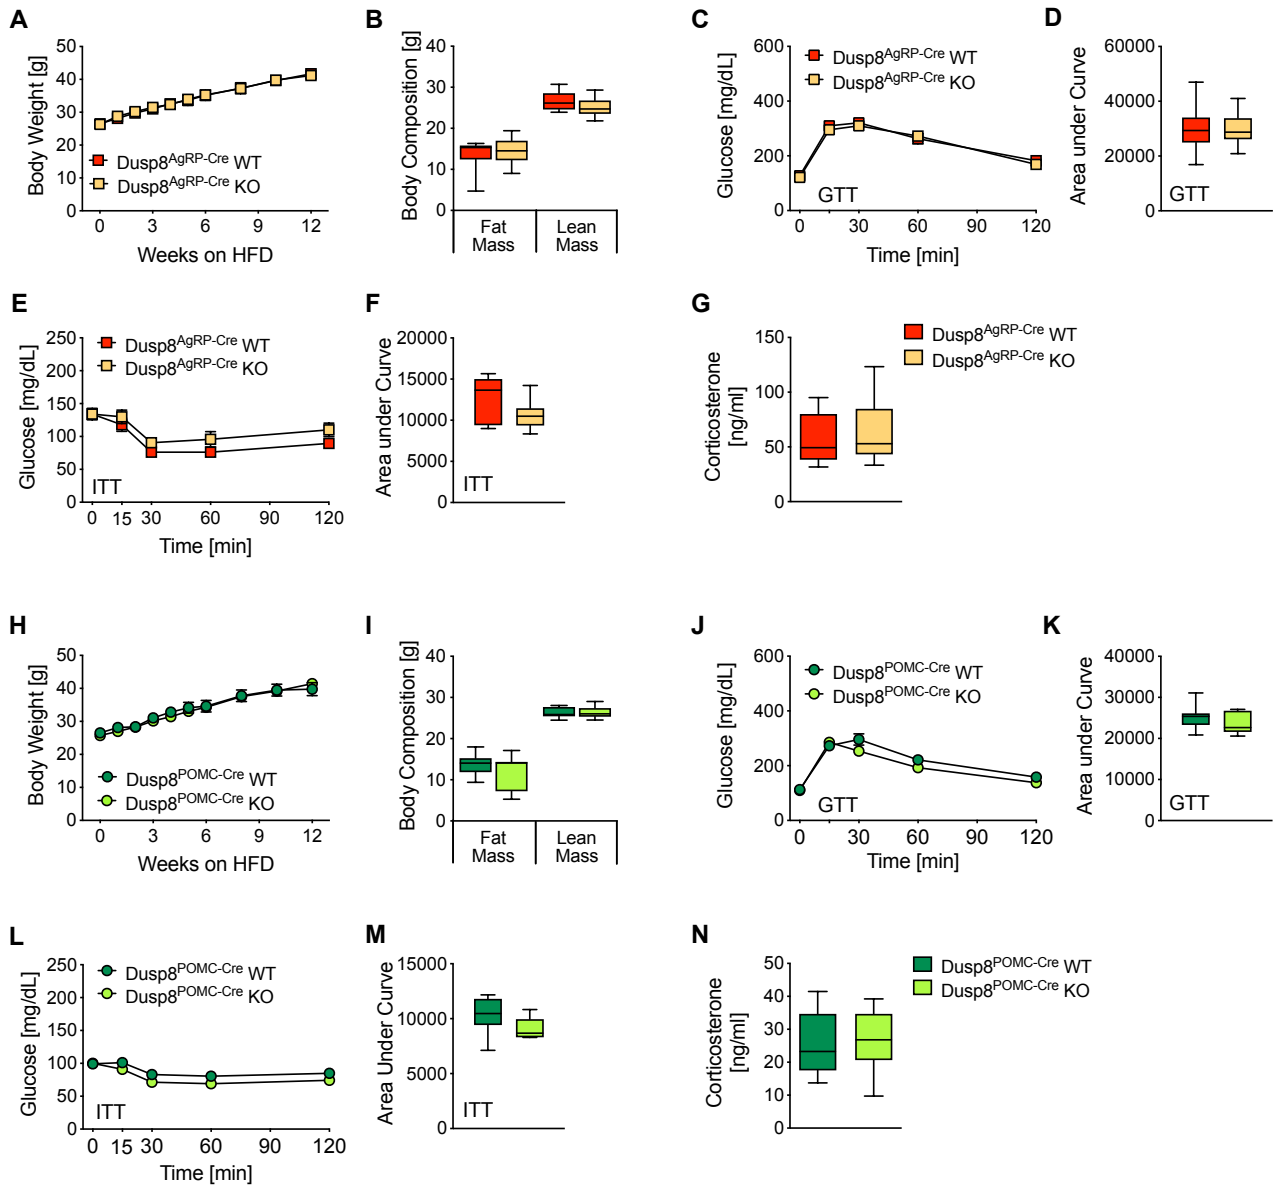

**Supplemental Figure 6: Ablation of Dusp8 specifically from AgRP or POMC neurons does not alter glucose metabolism or corticosterone levels in male mice on HFD.**

**A)** Body weight gain over a total of 12 wks, and **B)** fat and lean mass of male  $Dusp8^{AgRP-Cre}$  WT (n=8) and KO (n=12) littermates after 12 wks of HFD exposure. **C-F)** Glucose tolerance (GTT) and insulin tolerance tests (ITT) were carried out after 12 or 13 wks of HFD exposure, respectively (n=8 WT, n=12  $Dusp8^{AgRP-Cre}$  KO). **G)** Plasma corticosterone levels of male  $Dusp8^{AgRP-Cre}$  WT (n=5) and KO mice (n=7) after HFD exposure.

**H)** Body weight gain over 12 wks, and **I)** fat and lean mass of male  $Dusp8^{POMC-Cre}$  WT (n=10) and KO (n=7) littermates after 12 wks of HFD exposure. **J-M)** Glucose tolerance (GTT) and insulin tolerance tests (ITT) were carried out after 12 wks or 13 wks of HFD exposure, respectively (n=10 WT, n=7  $Dusp8^{POMC-Cre}$  KO). **N)** Plasma corticosterone levels of male  $Dusp8^{POMC-Cre}$  WT (n=5) and KO mice (n=6) after HFD exposure.

Data are shown as means  $\pm$  s.e.m. (A,C,E,H,J,L) or as box-and-whisker-plots (B,D,F,G,I,K,M,N). Two-Way ANOVA (A,C,E,H,J,L) or Student's t-test (B,D,F,G,I,K,M,N).

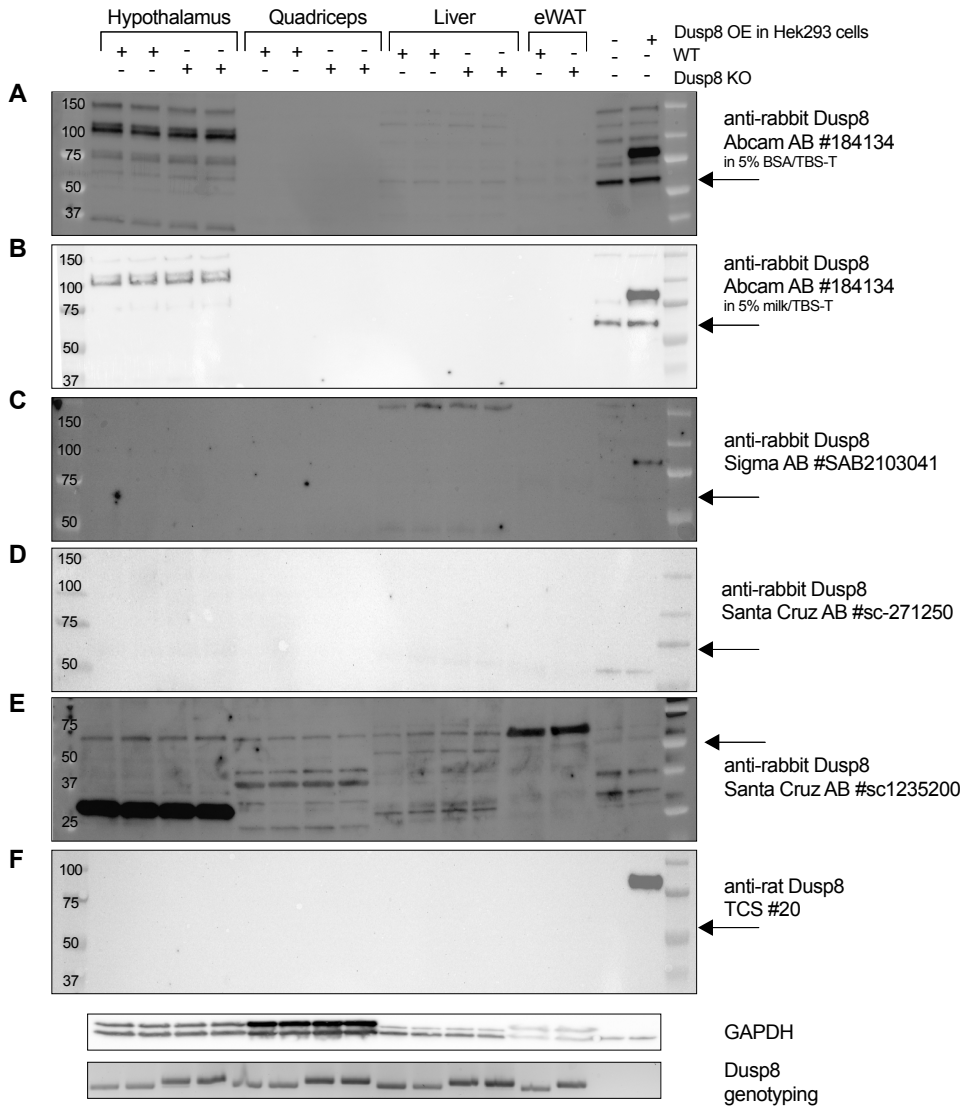

**Supplemental Figure 7: Detection of Dusp8 protein levels in tissues of HFD-fed Dusp8 WT and KO males and in cells overexpressing Dusp8.**

Western Blot analysis of proteins extracted from hypothalamus, quadriceps, liver and epididymal white adipose tissue (eWAT) of HFD-fed Dusp8 WT and KO male mice and from Hek293 cells transfected with control or Dusp8 overexpressing (OE) plasmid. Commercial antibodies against Dusp8 from **A)** Abcam #184134 in 5% BSA/TBS-T, **B)** Abcam #184134 in 5% milk/TBS-T, **C)** Sigma #SAB2103041, **D)** Santa Cruz #sc-271250 or **E)** Santa Cruz #sc-1235200 were tested as well as the **F)** selected Dusp8 clone #20 from our Antibody Core Facility. None of the tested Dusp8 antibodies detected a protein with 66 kDa (indicated by the arrow) that was absent in the Dusp8 KO samples. GAPDH was detected as loading control. Genotypes were confirmed by PCR followed by agarose gel electrophoresis (WT =370 bp, KO=430 bp).

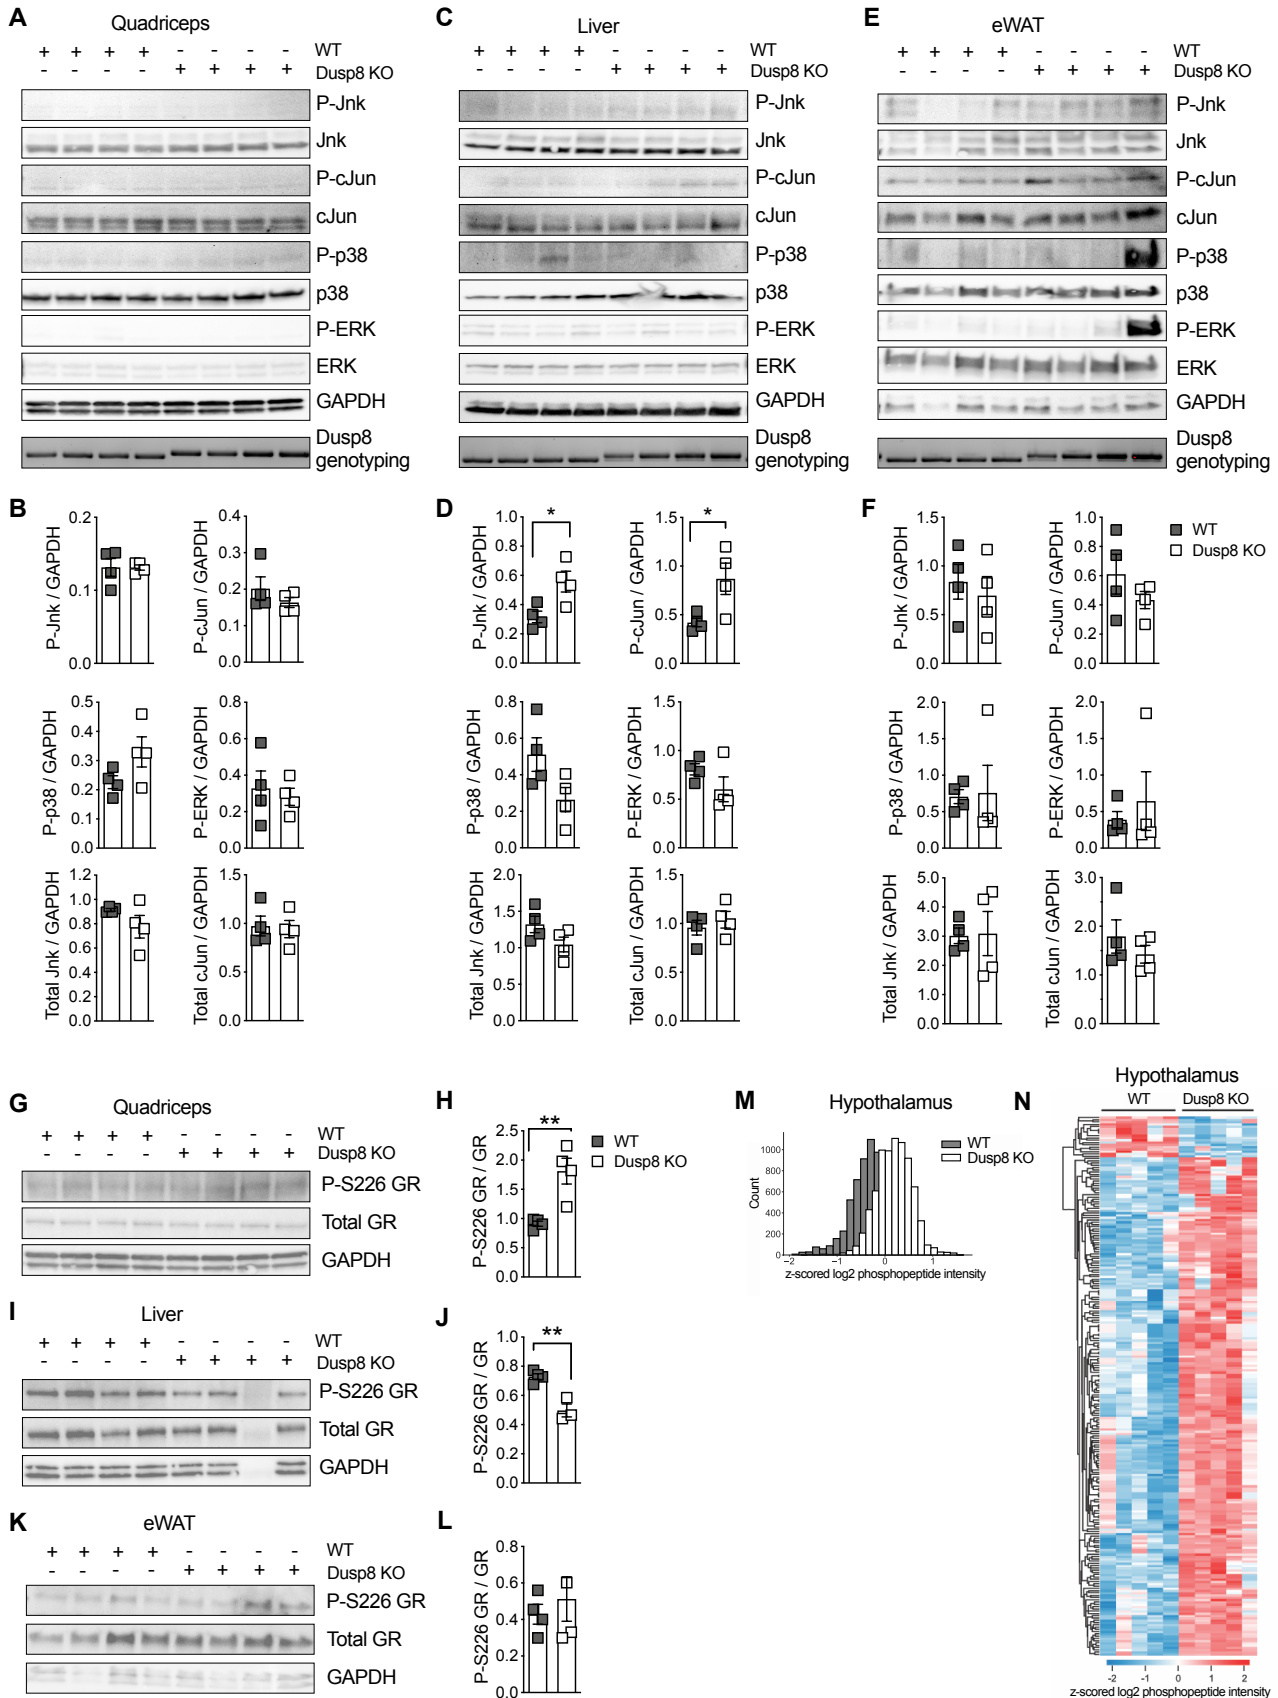

**Supplemental Figure 8: Ablation of Dusp8 increases the phosphorylation of Jnk and cJun in liver as well as phosphorylation of GR in quadriceps and the number of phosphorylated peptides in hypothalami of HFD-fed male mice.**

Western Blot and densitometric analysis of phosphorylated and total MAPK proteins relative to GAPDH in quadriceps (A,B), liver (C,D) and eWAT (E,F) of male Dusp8 KO (n=4) and WT mice (n=4) after 16 wks of HFD exposure. The genotypes of male mice were confirmed by PCR followed by agarose gel electrophoresis

to detect the WT (370 bp) and KO (430 bp) bands. Western Blot and densitometric analysis of GR phosphorylated at Ser226 relative to total GR in **G,H** quadriceps, **I,J** liver and **K,L** eWAT of male Dusp8 KO (n=4) and WT mice (n=4) after 16 wks of HFD exposure.

**M**) Higher phosphorylation levels of hypothalamic proteins in Dusp8 KO males on HFD (n=5) vs WT controls (n=5) based on log<sub>2</sub> transformed peptide intensities. **N**) Heat map of significantly changed phosphopeptides from Easyphos analyses of hypothalami of HFD-fed male Dusp8 KO (n=5) and WT (n=5) mice.

Data are shown as scatter dot plots (B,D,F,H,J,L) or as means (M). \*p<0.05 and \*\*p<0.01; Student's t-tests.

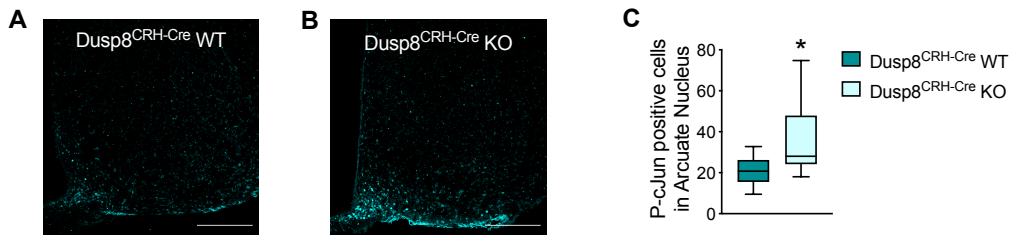

**Supplemental Figure 9: Increased P-cJun positive nuclei in the arcuate nucleus of HFD-fed Dusp8<sup>CRH-Cre</sup> KO males.**

Representative immunofluorescence detection of of cJun phosphorylation in hypothalamic slices of male **A**) Dusp8<sup>CRH-Cre</sup> WT (n=7) and **B**) Dusp8<sup>CRH-Cre</sup> KO (n=10) littermates after 14 wks of HFD feeding and **C**) counting of positive stained nuclei.

Data are shown as box-and-whisker-plots. Scale bar = 200  $\mu$ M. \*p<0.05; Student's t-tests.

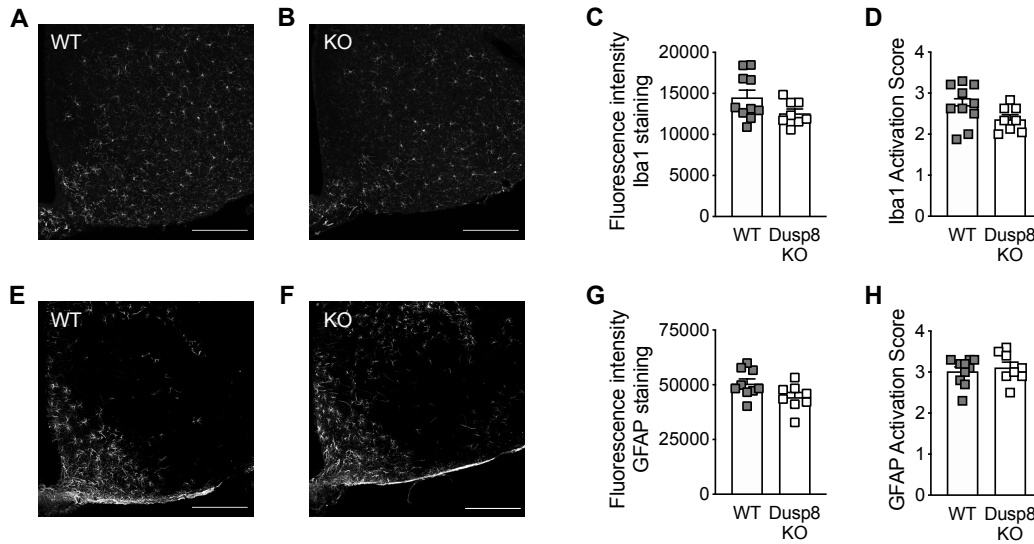

**Supplemental Figure 10: Ablation of Dusp8 does not induce hypothalamic astrocytosis or microgliosis.**

Representative immunohistochemical detection of Iba1<sup>+</sup> microglia in hypothalamic slices of male **A**) WT (n=10) and **B**) Dusp8 KO (n=8) mice after 28 wks of HFD exposure. **C**) Average Iba1 fluorescence intensity in the ARC. **D**) Blinded assignment of the microglia activation score of Iba1<sup>+</sup> cells within the ARC.

Representative immunohistochemical detection of GFAP<sup>+</sup> astrocytes in hypothalamic slices of male **E**) WT (n=10) and **F**) Dusp8 KO (n=8) mice after 28 wks of HFD exposure. **G**) The average GFAP fluorescence intensity was measured in the ARC. **H**) Blinded assignment of the astrocyte activation score.

Data are shown as scatter dot plots. Scale bar = 200  $\mu$ M. \*p<0.05; Student's t-tests.

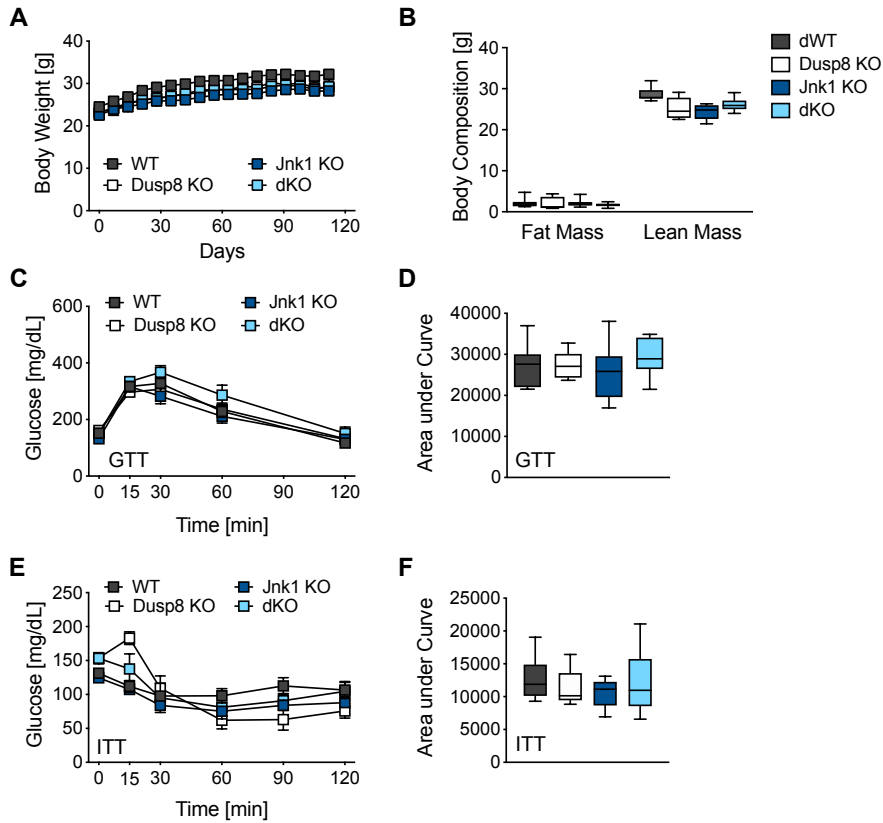

**Supplemental Figure 11: Unaltered body composition and glucose homeostasis in Jnk1-Dusp8 dKO mice on Chow diet.**

**A)** Body weight of male Dusp8 KO (n=5), Jnk1-Dusp8 dKO (n=10) and Jnk1 KO (n=11) mice relative to WT controls (n=10) was measured over 16 wks of Chow feeding. **B)** Male WT (n=10), Dusp8 KO (n=5), Jnk1-Dusp8 dKO (n=10) and Jnk1 KO mice (n=11) were analysed for their body composition at week 16. **C-F)** Glucose tolerance (GTT) and insulin tolerance (ITT) were evaluated at 12 wks or 13 wks, respectively, of Chow diet exposure in male Dusp8 KO (n=5), Jnk1-Dusp8 dKO (n=10) and Jnk1 KO (n=11) mice relative to WT controls (n=10).

Data are shown as means  $\pm$  s.e.m (A,C,E) or as box-and-whisker-plots (B,D,F). Two-Way ANOVA (A,C,E) or One-Way ANOVA (B,D,F).

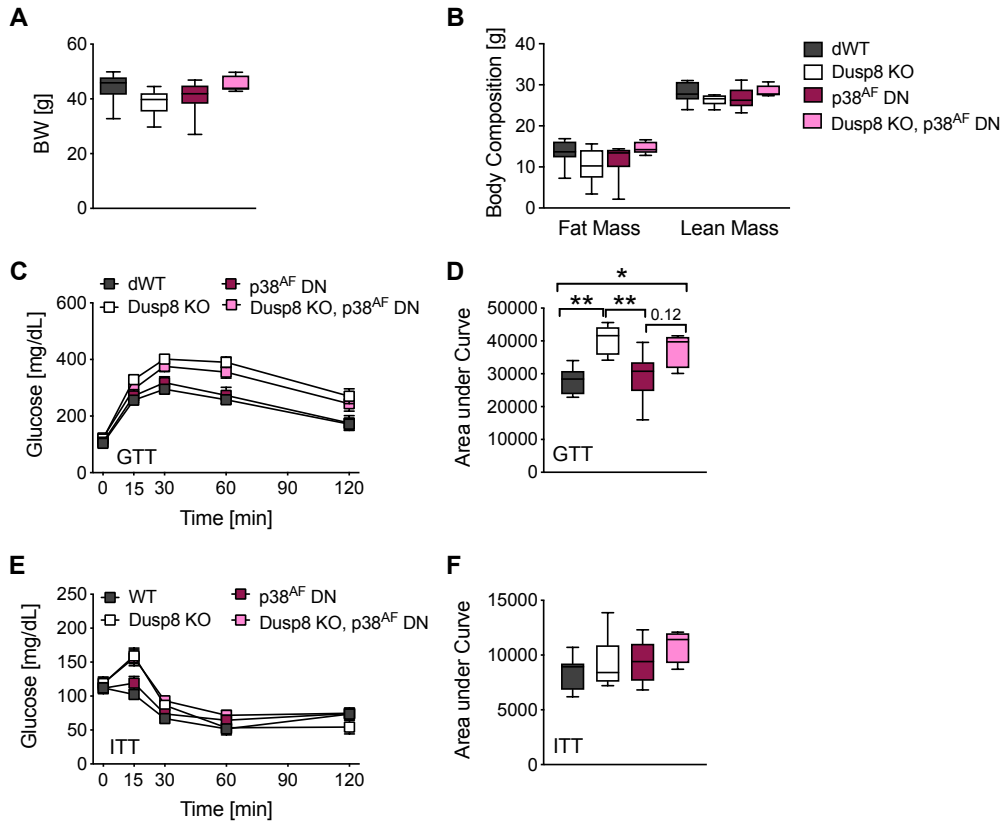

**Supplemental Figure 12: Glucose intolerance in HFD-fed Dusp8 KO mice is not mediated by p38.**

**A)** Comparable body weights and **B)** body composition in Dusp8 KO mice (n=6), mice with a single dominant negative allele of p38 (p38<sup>AF</sup> DN; n=7), double mutants (Dusp8 KO, p38<sup>AF</sup> DN; n=5) and dWT controls (n=7) subjected to 20 wks of HFD exposure.

**C-F)** Glucose tolerance (GTT) and insulin tolerance tests (ITT) were carried out after 18 wks or 19 wks of HFD exposure, respectively (n=7 dWT, n=6 Dusp8 KO, n=7 p38<sup>AF</sup> DN HET, n=5 Dusp8 KO, p38<sup>AF</sup> DN).

Data are shown as box-and-whisker-plots (A,B,D,F) or as means  $\pm$  s.e.m. (C,E). \* $p$ <0.05 and \*\* $p$ <0.01; One-Way ANOVA (A,B,D,F) or Two-Way ANOVA (C,E).

**Supplemental Table 1: Easyphos proteome analyses of hypothalami from HFD-fed Dusp8 WT and KO mice.** By phospho-proteome analysis a set of 237 significantly regulated phospho-sites was defined by the following criteria: Student's t-test p-value < 0.01.

| Symbol      | Protein name                                        | Position in protein | Amino acid | Mean log2 Intensity in WT | Mean log2 intensity in Dusp8 KO | # of phospho-sites on peptide | p-value  | log2 fold change (KO vs WT) | Uniprot ID |
|-------------|-----------------------------------------------------|---------------------|------------|---------------------------|---------------------------------|-------------------------------|----------|-----------------------------|------------|
| Mtmr2       | Myotubularin-related protein 2                      | 9                   | S          | 21.35246                  | 27.5702                         | 2                             | 1.14E-07 | 6.22                        | Q9Z2D1     |
| Gap43       | Neuromodulin                                        | 193                 | S          | 21.6414                   | 25.44018                        | 2                             | 1.73E-06 | 3.80                        | P06837     |
| Ctnna2      | Catenin alpha-2                                     | 275                 | S          | 27.34554                  | 22.70766                        | 1                             | 1.53E-05 | -4.64                       | E0CXB9     |
| Dpysl4      | Dihydropyrimidinase-related protein 4               | 527                 | S          | 21.45674                  | 23.54756                        | 2                             | 1.01E-04 | 2.09                        | Q3TMU8     |
| Gtpbp1      | GTP-binding protein 1                               | 47                  | S          | 22.24962                  | 27.95328                        | 2                             | 1.32E-04 | 5.70                        | O08582     |
| Ndrg2       | Protein NDRG2                                       | 332                 | S          | 21.59674                  | 26.7207                         | 1                             | 1.34E-04 | 5.12                        | Q9QYG0-2   |
| Pclo        | Protein piccolo                                     | 4293                | S          | 21.63444                  | 25.47146                        | 3                             | 1.96E-04 | 3.84                        | Q9QYX7     |
| Gtpbp1      | GTP-binding protein 1                               | 44                  | S          | 22.03184                  | 27.95328                        | 2                             | 2.05E-04 | 5.92                        | O08582     |
| Pde4b;Pde4d | phosphodiesterase 4B, cAMP specific                 | 68                  | S          | 23.60718                  | 26.24242                        | 2                             | 2.26E-04 | 2.64                        | B1AWC8     |
| Bcas1       | Breast carcinoma-amplified sequence 1 homolog       | 523                 | T          | 22.25196                  | 24.99                           | 1                             | 2.62E-04 | 2.74                        | Q80YN3     |
| Scn1a       | Sodium channel protein                              | 623                 | S          | 21.21624                  | 24.2119                         | 1                             | 3.12E-04 | 3.00                        | A2APX7     |
| Rtn1        | Reticulon-1                                         | 332                 | T          | 27.646                    | 28.58256                        | 2                             | 3.94E-04 | 0.94                        | Q8K0T0     |
| Prrt3       | Proline-rich transmembrane protein 3                | 898                 | S          | 21.86106                  | 27.17458                        | 2                             | 4.79E-04 | 5.31                        | Q6PE13     |
| Igsf11      | Immunoglobulin superfamily member 11                | 363                 | S          | 22.04126                  | 24.47824                        | 1                             | 4.95E-04 | 2.44                        | D3Z6S7     |
| Kbtbd11     | Kelch repeat and BTB domain-containing protein 11   | 62                  | S          | 21.06632                  | 24.73242                        | 1                             | 5.21E-04 | 3.67                        | Q8BNW9     |
| Tjp2        | Tight junction protein ZO-2                         | 1044                | S          | 21.84848                  | 24.16438                        | 1                             | 5.59E-04 | 2.32                        | Q9Z0U1     |
| Bsn         | Protein bassoon                                     | 1100                | S          | 21.59462                  | 25.81456                        | 3                             | 5.71E-04 | 4.22                        | O88737     |
| Map1a       | Microtubule-associated protein 1A                   | 1233                | S          | 21.57896                  | 25.63536                        | 2                             | 6.25E-04 | 4.06                        | A2ARP8     |
| Cdkn1b      | Cyclin-dependent kinase inhibitor 1B                | 106                 | S          | 21.70388                  | 25.58044                        | 1                             | 6.58E-04 | 3.88                        | P46414     |
| Map7d2      | MAP7 domain-containing protein 2                    | 62                  | S          | 21.8899                   | 24.29272                        | 1                             | 6.80E-04 | 2.40                        | A2AG50-2   |
| Lpar1       | Lysophosphatidic acid receptor 1                    | 328                 | S          | 21.74484                  | 24.10924                        | 2                             | 7.61E-04 | 2.36                        | P61793-2   |
| Cep120      | Centrosomal protein of 120 kDa                      | 380                 | S          | 20.70736                  | 23.1632                         | 2                             | 7.64E-04 | 2.46                        | Q7TSG1-2   |
| Pde4b;Pde4d | cAMP-specific 3',5'-cyclic phosphodiesterase 4D     | 63                  | S          | 22.93448                  | 26.24242                        | 2                             | 8.12E-04 | 3.31                        | B1AWC8     |
| Snx19       | sorting nexin 19                                    | 704                 | S          | 21.02916                  | 24.21682                        | 1                             | 8.25E-04 | 3.19                        | Q6P4T1     |
| Bcas1       | brain enriched myelin associated protein 1          | 269                 | T          | 22.02586                  | 24.99                           | 1                             | 9.12E-04 | 2.96                        | F7BNZ5     |
| Ralbp1      | RalA-binding protein 1                              | 93                  | S          | 21.0758                   | 23.85064                        | 3                             | 9.20E-04 | 2.77                        | Q62172     |
| Map2        | Microtubule-associated protein 2                    | 1140                | S          | 26.7584                   | 28.7815                         | 3                             | 9.73E-04 | 2.02                        | P20357     |
| Eps8        | Epidermal growth factor receptor kinase substrate 8 | 684                 | S          | 21.07272                  | 23.8943                         | 1                             | 9.78E-04 | 2.82                        | Q08509     |



|           |                                                                |      |   |          |          |   |          |      |            |
|-----------|----------------------------------------------------------------|------|---|----------|----------|---|----------|------|------------|
| Rims1     | Regulating synaptic membrane exocytosis protein 1              | 1010 | S | 21.10656 | 24.187   | 1 | 9.98E-04 | 3.08 | F6VBR4     |
| Dnal1     | Dynein light chain 1, axonemal                                 | 56   | S | 22.17384 | 26.54536 | 1 | 1.02E-03 | 4.37 | D3YYU7     |
| Map1b     | Microtubule-associated protein 1B                              | 25   | S | 21.19544 | 24.17592 | 2 | 1.02E-03 | 2.98 | P14873     |
| Gm13889   | predicted gene 13889                                           | 113  | S | 21.25488 | 22.25016 | 2 | 1.04E-03 | 1.00 | A0A087WSH6 |
| Adam22    | Disintegrin and metalloproteinase domain-containing protein 22 | 858  | T | 21.49246 | 24.27496 | 2 | 1.17E-03 | 2.78 | Q9R1V6     |
| Chm       | choroideremia (RAB escort protein 1)                           | 622  | S | 21.26414 | 24.34652 | 1 | 1.23E-03 | 3.08 | Q3UR39     |
| Erbp2ip   | Protein LAP2                                                   | 595  | S | 21.63238 | 24.95996 | 3 | 1.34E-03 | 3.33 | B2RUJ2     |
| Lphn1     | Latrophilin-1                                                  | 1177 | S | 22.0828  | 25.01464 | 2 | 1.35E-03 | 2.93 | Q80TR1-2   |
| Ndrp2     | Protein NDRG2                                                  | 321  | S | 21.5529  | 26.80604 | 1 | 1.49E-03 | 5.25 | Q9QYG0-2   |
| Ybx3      | Y-box-binding protein 3                                        | 259  | S | 22.16538 | 25.61934 | 1 | 1.53E-03 | 3.45 | Q9JKB3-2   |
| Nasp      | nuclear autoantigenic sperm protein                            | 114  | S | 21.18412 | 24.2267  | 2 | 1.56E-03 | 3.04 | Q99MD9-2   |
| Dlgap4    | Disks large-associated protein 4                               | 970  | S | 21.31144 | 23.4599  | 2 | 1.59E-03 | 2.15 | B1AZP2-2   |
| Fam134b   | Protein FAM134B                                                | 264  | S | 22.40262 | 24.96734 | 2 | 1.63E-03 | 2.56 | E9QPM1     |
| Sik3      | Serine/threonine-protein kinase SIK3                           | 591  | S | 25.19542 | 26.91546 | 2 | 1.65E-03 | 1.72 | E9PU87     |
| Sik3      | Serine/threonine-protein kinase SIK3                           | 592  | S | 25.19542 | 26.91546 | 2 | 1.65E-03 | 1.72 | E9PU87     |
| Rims1     | Regulating synaptic membrane exocytosis protein 1              | 514  | S | 27.06688 | 28.18896 | 1 | 1.66E-03 | 1.12 | Q99NE5-7   |
| Phldb1    | Pleckstrin homology-like domain family B member 1              | 325  | S | 22.0394  | 25.41614 | 2 | 1.67E-03 | 3.38 | F6RUK9     |
| Ccar2     | Cell cycle and apoptosis regulator protein 2                   | 674  | S | 25.83452 | 28.9305  | 3 | 1.72E-03 | 3.10 | Q8VDP4     |
| Ccar2     | Cell cycle and apoptosis regulator protein 2                   | 677  | S | 25.83452 | 28.9305  | 3 | 1.72E-03 | 3.10 | Q8VDP4     |
| Ccar2     | Cell cycle and apoptosis regulator protein 2                   | 680  | S | 25.83452 | 28.9305  | 3 | 1.72E-03 | 3.10 | Q8VDP4     |
| Dpysl4    | Dihydropyrimidinase-related protein 4                          | 521  | S | 21.41576 | 23.54756 | 2 | 1.77E-03 | 2.13 | Q3TMU8     |
| Crmp1     | Dihydropyrimidinase-related protein 1                          | 684  | S | 22.65642 | 27.80666 | 2 | 1.87E-03 | 5.15 | Q6P1J1     |
| Bcl9l     | B-cell CLL/lymphoma 9-like protein                             | 923  | S | 21.7482  | 24.75384 | 2 | 1.92E-03 | 3.01 | Q67FY2     |
| Rab11fip2 | Rab11 family-interacting protein 2                             | 135  | S | 21.28792 | 23.1958  | 1 | 1.93E-03 | 1.91 | G3UW57     |
| Tbc1d5    | TBC1 domain family member 5                                    | 562  | S | 21.67298 | 26.05    | 2 | 1.96E-03 | 4.38 | Q80XQ2     |
| Erbp2ip   | Protein LAP2                                                   | 599  | S | 21.82568 | 24.95996 | 3 | 2.03E-03 | 3.13 | B2RUJ2     |
| Bcl9l     | B-cell CLL/lymphoma 9-like protein                             | 912  | S | 21.67662 | 24.75384 | 2 | 2.05E-03 | 3.08 | Q67FY2     |
| Phldb1    | Pleckstrin homology-like domain family B member 1              | 330  | S | 21.63578 | 25.41614 | 2 | 2.05E-03 | 3.78 | F6RUK9     |
| Fam134b   | Protein FAM134B                                                | 269  | S | 22.14782 | 24.96734 | 2 | 2.08E-03 | 2.82 | E9QPM1     |
| Mapk8ip1  | C-Jun-amino-terminal kinase-interacting protein 1              | 14   | S | 21.64144 | 27.04482 | 2 | 2.09E-03 | 5.40 | Q9WVI9-2   |
| Ralbp1    | RalA-binding protein 1                                         | 99   | S | 21.5331  | 23.85064 | 3 | 2.20E-03 | 2.32 | Q62172     |
| Crmp1     | Dihydropyrimidinase-related protein 1                          | 680  | S | 22.59302 | 27.80666 | 2 | 2.27E-03 | 5.21 | Q6P1J1     |
| Nasp      | nuclear autoantigenic sperm protein                            | 111  | T | 21.18196 | 24.2201  | 2 | 2.31E-03 | 3.04 | Q99MD9-2   |

|                  |                                                      |      |   |          |          |   |          |       |            |
|------------------|------------------------------------------------------|------|---|----------|----------|---|----------|-------|------------|
| Kat7             | Histone acetyltransferase KAT7                       | 128  | T | 22.554   | 25.90062 | 3 | 2.33E-03 | 3.35  | Q5SVQ0-4   |
| Cpne6            | Copine-6                                             | 548  | T | 27.0809  | 26.8094  | 2 | 2.33E-03 | -0.27 | Q9Z140     |
| Epb4113          | erythrocyte membrane protein band 4.1 like 3         | 520  | S | 21.4197  | 24.82094 | 2 | 2.36E-03 | 3.40  | Q9WV92-8   |
| Pagr1a           | PAXIP1-associated glutamate-rich protein 1A          | 147  | S | 22.03874 | 24.0513  | 3 | 2.37E-03 | 2.01  | Q99L02     |
| Tmem19           | Transmembrane protein 19                             | 294  | S | 21.08302 | 22.89886 | 1 | 2.37E-03 | 1.82  | Q91W52     |
| Pak3             | Serine/threonine-protein kinase PAK 3                | 241  | S | 21.3765  | 23.73558 | 1 | 2.42E-03 | 2.36  | A3KGC5     |
| Stk32c           | Serine/threonine-protein kinase 32C                  | 18   | S | 27.47958 | 22.95766 | 1 | 2.43E-03 | -4.52 | Q8QZV4     |
| Prpf4b           | Serine/threonine-protein kinase PRP4 homolog         | 368  | S | 22.1484  | 27.08416 | 2 | 2.44E-03 | 4.94  | Q61136     |
| Stk32c           | Serine/threonine-protein kinase 32C                  | 10   | S | 22.12478 | 25.9006  | 2 | 2.52E-03 | 3.78  | Q8QZV4     |
| Trp53bp1;Tp53bp1 | Tumor suppressor p53-binding protein 1               | 716  | S | 22.59584 | 24.5734  | 2 | 2.54E-03 | 1.98  | A2AU89     |
| Gnl1             | Guanine nucleotide-binding protein-like 1            | 50   | T | 22.87718 | 26.12694 | 3 | 2.75E-03 | 3.25  | P36916     |
| Add3             | Gamma-adducin                                        | 649  | S | 21.85344 | 24.75646 | 1 | 2.76E-03 | 2.90  | Q9QYB5-2   |
| Nfib             | Nuclear factor 1;Nuclear factor 1 B-type             | 332  | S | 21.07826 | 23.40334 | 2 | 2.81E-03 | 2.33  | A2BG76     |
| Rere             | Arginine-glutamic acid dipeptide repeats protein     | 839  | S | 22.11034 | 24.50938 | 3 | 2.83E-03 | 2.40  | A2A7T3     |
| Bsn              | Protein bassoon                                      | 1486 | S | 21.71884 | 24.00528 | 3 | 2.88E-03 | 2.29  | O88737     |
| Gapdh,Gm3839     | Glyceraldehyde-3-phosphate dehydrogenase             | 165  | S | 21.20106 | 25.73152 | 1 | 2.90E-03 | 4.53  | S4R257     |
| Ank2             | Ankyrin-2                                            | 2206 | S | 22.39566 | 25.23722 | 3 | 2.92E-03 | 2.84  | Q8C8R3-4   |
| Erb2ip           | Protein LAP2                                         | 600  | S | 22.11914 | 24.95996 | 3 | 2.94E-03 | 2.84  | B2RUJ2     |
| Cnr1             | Cannabinoid receptor 1                               | 323  | S | 20.61994 | 21.95588 | 2 | 2.94E-03 | 1.34  | P47746     |
| Kat7             | Histone acetyltransferase KAT7                       | 124  | S | 22.23112 | 25.90062 | 3 | 2.96E-03 | 3.67  | Q5SVQ0-4   |
| Rtl1             | Retrotransposon-like protein 1                       | 1739 | S | 21.54532 | 23.73618 | 2 | 2.96E-03 | 2.19  | Q7M732     |
| Crmp1            | Dihydropyrimidinase-related protein 1                | 654  | S | 22.53664 | 26.12118 | 2 | 2.96E-03 | 3.58  | Q6P1J1     |
| Intu             | Protein inturned                                     | 678  | S | 21.31472 | 22.86116 | 2 | 3.07E-03 | 1.55  | Q059U7     |
| Add3             | Gamma-adducin                                        | 42   | S | 20.60708 | 24.99394 | 1 | 3.11E-03 | 4.39  | Q9QYB5-2   |
| Nbea             | Neurobeachin                                         | 1004 | S | 26.32288 | 27.49464 | 2 | 3.14E-03 | 1.17  | Q9EPN1     |
| Srrm2            | Serine/arginine repetitive matrix protein 2          | 453  | S | 25.6084  | 21.19234 | 2 | 3.21E-03 | -4.42 | Q8BTI8     |
| Vat11            | Synaptic vesicle membrane protein VAT-1 homolog-like | 390  | S | 27.5651  | 29.72896 | 3 | 3.31E-03 | 2.16  | Q80TB8     |
| Rimbp2           | RIMS-binding protein 2                               | 793  | T | 21.30842 | 24.01946 | 2 | 3.39E-03 | 2.71  | A0A0G2JGW5 |
| Map1b            | Microtubule-associated protein 1B                    | 1616 | S | 30.79682 | 31.33548 | 2 | 3.39E-03 | 0.54  | P14873     |
| Mapt             | Microtubule-associated protein                       | 497  | T | 28.56146 | 30.15026 | 2 | 3.40E-03 | 1.59  | A0A0A0MQC7 |
| Rere             | Arginine-glutamic acid dipeptide repeats protein     | 830  | S | 21.821   | 24.50938 | 3 | 3.44E-03 | 2.69  | A2A7T3     |
| Numbl            | Numb-like protein                                    | 270  | S | 21.38036 | 29.81918 | 2 | 3.50E-03 | 8.44  | O08919     |

|                        |                                                         |      |   |          |          |   |          |       |            |
|------------------------|---------------------------------------------------------|------|---|----------|----------|---|----------|-------|------------|
| Akap10                 | A-kinase anchor protein 10, mitochondrial               | 52   | S | 21.67248 | 23.45964 | 1 | 3.51E-03 | 1.79  | O88845     |
| Git1                   | ARF GTPase-activating protein GIT1                      | 388  | S | 21.99116 | 25.73254 | 3 | 3.60E-03 | 3.74  | Q5F258     |
| Gnl1                   | Guanine nucleotide-binding protein-like 1               | 48   | T | 22.53576 | 26.12694 | 3 | 3.69E-03 | 3.59  | P36916     |
| Mylk                   | Myosin light chain kinase, smooth muscle                | 1810 | S | 21.32224 | 23.68076 | 2 | 3.75E-03 | 2.36  | B1B1A8     |
| Rbm28                  | RNA-binding protein 28                                  | 239  | S | 22.44726 | 26.39722 | 2 | 3.76E-03 | 3.95  | Q8CGC6     |
| Rbm28                  | RNA-binding protein 28                                  | 231  | S | 22.35398 | 26.39722 | 2 | 3.91E-03 | 4.04  | Q8CGC6     |
| Mtmr2                  | Myotubularin-related protein 2                          | 4    | S | 22.15694 | 24.48588 | 3 | 3.96E-03 | 2.33  | Q9Z2D1     |
| Gnl1                   | Guanine nucleotide-binding protein-like 1               | 51   | S | 22.67722 | 26.12694 | 3 | 3.97E-03 | 3.45  | P36916     |
| Map1b                  | Microtubule-associated protein 1B                       | 1639 | S | 21.52842 | 26.1923  | 2 | 3.98E-03 | 4.66  | P14873     |
| Prpf4b                 | Serine/threonine-protein kinase PRP4 homolog            | 366  | S | 22.88244 | 27.08416 | 2 | 4.02E-03 | 4.20  | Q61136     |
| Dpysl4                 | Dihydropyrimidinase-related protein 4                   | 566  | S | 22.39332 | 25.05452 | 2 | 4.05E-03 | 2.66  | Q3TMU8     |
| Vat1l                  | Synaptic vesicle membrane protein VAT-1 homolog-like    | 393  | T | 27.18086 | 29.72896 | 3 | 4.12E-03 | 2.55  | Q80TB8     |
| Apex1                  | apurinic/apyrimidinic endonuclease 1                    | 18   | S | 21.62048 | 24.91622 | 1 | 4.23E-03 | 3.30  | D3Z6R9     |
| Sorbs2                 | Sorbin and SH3 domain-containing protein 2              | 443  | S | 21.41482 | 23.78102 | 2 | 4.25E-03 | 2.37  | Q3UTJ2-2   |
| Rnf214                 | RING finger protein 214                                 | 27   | S | 21.15114 | 26.01288 | 1 | 4.40E-03 | 4.86  | Q8BFU3-4   |
| Dmd                    | Dystrophin                                              | 542  | S | 21.10126 | 24.4569  | 1 | 4.40E-03 | 3.36  | A2A9Z1     |
| Git1                   | ARF GTPase-activating protein GIT1                      | 392  | T | 21.87562 | 25.73254 | 3 | 4.46E-03 | 3.86  | Q5F258     |
| Nefm                   | Neurofilament medium polypeptide                        | 550  | S | 23.00618 | 27.98332 | 3 | 4.52E-03 | 4.98  | P08553     |
| F11r                   | Junctional adhesion molecule A                          | 285  | S | 21.4003  | 23.07784 | 2 | 4.55E-03 | 1.68  | O88792     |
| Lpin2                  | Phosphatidate phosphatase LPIN2                         | 225  | S | 22.16852 | 24.41174 | 2 | 4.68E-03 | 2.24  | E9PWN0     |
| 2310035C23Rik;Kiaa1468 | LisH domain and HEAT repeat-containing protein KIAA1468 | 193  | S | 22.30312 | 26.4614  | 2 | 4.69E-03 | 4.16  | A0A087WRM8 |
| Fam111a                | Protein FAM111A                                         | 8    | T | 21.92628 | 22.8433  | 2 | 4.70E-03 | 0.92  | D3YYD2     |
| Rab8a                  | Ras-related protein Rab-8A                              | 185  | S | 26.84214 | 21.2381  | 2 | 4.71E-03 | -5.60 | P55258     |
| Nefm                   | Neurofilament medium polypeptide                        | 565  | T | 22.54386 | 27.98332 | 3 | 4.76E-03 | 5.44  | P08553     |
| Ppp1r2                 | Protein phosphatase inhibitor 2                         | 122  | S | 23.98814 | 25.42342 | 3 | 4.79E-03 | 1.44  | D3Z3A0     |
| Ppp1r2                 | Protein phosphatase inhibitor 2                         | 123  | S | 23.98814 | 25.42342 | 3 | 4.79E-03 | 1.44  | D3Z3A0     |
| Ppp1r2                 | Protein phosphatase inhibitor 2                         | 131  | S | 23.98814 | 25.42342 | 3 | 4.79E-03 | 1.44  | D3Z3A0     |
| Akt1s1                 | Proline-rich AKT1 substrate 1                           | 239  | S | 23.3751  | 25.59248 | 3 | 4.81E-03 | 2.22  | E9QKI5     |
| Nefm                   | Neurofilament medium polypeptide                        | 551  | S | 22.81054 | 27.98332 | 3 | 4.83E-03 | 5.17  | P08553     |
| Mtmr2                  | Myotubularin-related protein 2                          | 5    | S | 21.93836 | 24.48588 | 3 | 4.85E-03 | 2.55  | Q9Z2D1     |
| Snn                    | Stannin                                                 | 49   | S | 21.22464 | 25.20736 | 1 | 4.93E-03 | 3.98  | P61807     |
| Rpap3                  | RNA polymerase II-associated protein 3                  | 120  | S | 21.70706 | 24.44852 | 3 | 4.95E-03 | 2.74  | Q9D706     |
| Camk2n2                | Calcium/calmodulin-dependent protein kinase II          | 25   | S | 21.86918 | 23.86772 | 1 | 5.01E-03 | 2.00  | Q78WH7     |

|               |                                                                   |      |   |          |          |   |          |       |            |
|---------------|-------------------------------------------------------------------|------|---|----------|----------|---|----------|-------|------------|
|               | inhibitor 2                                                       |      |   |          |          |   |          |       |            |
| Pdlim4        | PDZ and LIM domain protein 4                                      | 59   | S | 20.98758 | 23.42264 | 1 | 5.01E-03 | 2.44  | A8Y5C3     |
| Nucks1        | Nuclear ubiquitous casein and cyclin-dependent kinase substrate 1 | 214  | S | 26.93758 | 27.92444 | 3 | 5.02E-03 | 0.99  | Q80XU3     |
| Nucks1        | Nuclear ubiquitous casein and cyclin-dependent kinase substrate 1 | 204  | S | 26.93758 | 27.92444 | 3 | 5.02E-03 | 0.99  | Q80XU3     |
| Nucks1        | Nuclear ubiquitous casein and cyclin-dependent kinase substrate 1 | 202  | T | 26.93758 | 27.92444 | 3 | 5.02E-03 | 0.99  | Q80XU3     |
| Snx27         | Sorting nexin-27                                                  | 49   | S | 21.41044 | 24.14808 | 1 | 5.04E-03 | 2.74  | A0A0G2JG07 |
| Git1          | ARF GTPase-activating protein GIT1                                | 385  | S | 22.09804 | 25.73254 | 3 | 5.09E-03 | 3.63  | Q5F258     |
| Dopey2        | Protein dopey-2                                                   | 601  | S | 22.41266 | 21.7489  | 2 | 5.10E-03 | -0.66 | Q3UHQ6-2   |
| Mink1         | Misshapen-like kinase 1                                           | 793  | S | 23.12748 | 24.86152 | 1 | 5.17E-03 | 1.73  | F7AMS7     |
| Marcks        | Myristoylated alanine-rich C-kinase substrate                     | 126  | T | 22.7265  | 25.74244 | 3 | 5.21E-03 | 3.02  | P26645     |
| Ralbp1        | RalA-binding protein 1                                            | 92   | S | 21.88882 | 23.85064 | 3 | 5.24E-03 | 1.96  | Q62172     |
| Tpd52         | Tumor protein D52                                                 | 246  | S | 22.95496 | 29.66772 | 1 | 5.26E-03 | 6.71  | F8WHQ1     |
| Bcl9          | B-cell CLL/lymphoma 9 protein                                     | 872  | S | 23.44492 | 21.4369  | 3 | 5.28E-03 | -2.01 | Q9D219     |
| Ash2l         | ASH2 like histone lysine methyltransferase complex subunit        | 96   | S | 22.22196 | 24.0347  | 1 | 5.29E-03 | 1.81  | D6RI55     |
| Slc20a1       | Sodium-dependent phosphate transporter 1                          | 269  | S | 21.54832 | 24.77158 | 1 | 5.41E-03 | 3.22  | Q61609     |
| Fam169a       | Soluble lamin-associated protein of 75 kDa                        | 630  | S | 25.44    | 27.63628 | 2 | 5.49E-03 | 2.20  | Q5XG69     |
| Fam169a       | Soluble lamin-associated protein of 75 kDa                        | 631  | S | 25.44    | 27.63628 | 2 | 5.49E-03 | 2.20  | Q5XG69     |
| Pbxip1        | Pre-B-cell leukemia transcription factor-interacting protein 1    | 151  | S | 21.22914 | 23.21366 | 3 | 5.51E-03 | 1.98  | D3YUE1     |
| Apba1         | Amyloid beta A4 precursor protein-binding family A member 1       | 246  | S | 26.30454 | 24.8859  | 3 | 5.57E-03 | -1.42 | B2RUJ5     |
| Apba1         | Amyloid beta A4 precursor protein-binding family A member 1       | 250  | S | 26.30454 | 24.8859  | 3 | 5.57E-03 | -1.42 | B2RUJ5     |
| Apba1         | Amyloid beta A4 precursor protein-binding family A member 1       | 252  | S | 26.30454 | 24.8859  | 3 | 5.57E-03 | -1.42 | B2RUJ5     |
| Zfp423;Znf423 | Zinc finger protein 423                                           | 487  | S | 22.38772 | 23.23492 | 2 | 5.59E-03 | 0.85  | G3UW89     |
| Nrcam         | Neuronal cell adhesion molecule                                   | 1251 | S | 21.7674  | 25.3428  | 2 | 5.67E-03 | 3.58  | Q810U4-3   |
| Penk          | preproenkephalin                                                  | 252  | S | 21.98608 | 23.69206 | 2 | 5.68E-03 | 1.71  | P22005     |
| Rtl1          | Retrotransposon-like protein 1                                    | 1737 | S | 22.0014  | 23.73618 | 2 | 5.71E-03 | 1.73  | Q7M732     |
| Cers2         | Ceramide synthase 2                                               | 341  | S | 21.59614 | 25.6424  | 3 | 5.75E-03 | 4.05  | Q924Z4     |
| Rplp2         | 60S acidic ribosomal protein P2                                   | 105  | S | 21.92594 | 24.91438 | 2 | 5.80E-03 | 2.99  | P99027     |
| Heph          | Hephaestin                                                        | 1143 | S | 22.2135  | 23.7311  | 2 | 5.83E-03 | 1.52  | Q9Z0Z4-2   |
| Rpap3         | RNA polymerase II-associated protein 3                            | 122  | S | 22.06756 | 24.44852 | 3 | 5.86E-03 | 2.38  | Q9D706     |

|           |                                                                   |      |   |          |          |   |          |       |          |
|-----------|-------------------------------------------------------------------|------|---|----------|----------|---|----------|-------|----------|
| Ncl       | Nucleolin                                                         | 145  | S | 21.9254  | 26.30454 | 2 | 5.94E-03 | 4.38  | P09405   |
| Foxk1     | Forkhead box protein K1                                           | 422  | T | 21.9596  | 23.23072 | 2 | 6.05E-03 | 1.27  | P42128   |
| Snx11     | Sorting nexin-11                                                  | 192  | S | 22.7396  | 26.25084 | 2 | 6.15E-03 | 3.51  | Q91WL6   |
| Dnajc6    | Putative tyrosine-protein phosphatase auxilin                     | 695  | S | 21.38496 | 26.04012 | 1 | 6.15E-03 | 4.66  | Q80TZ3-2 |
| Ppp1r11   | Protein phosphatase 1 regulatory subunit 11                       | 69   | T | 21.37386 | 23.48518 | 2 | 6.18E-03 | 2.11  | G3UZ30   |
| Gabbr2    | Gamma-aminobutyric acid type B receptor subunit 2                 | 762  | T | 23.15576 | 27.14376 | 1 | 6.20E-03 | 3.99  | Q80T41   |
| Zdhhc5    | Palmitoyltransferase ZDHHC5                                       | 345  | S | 23.27124 | 21.23488 | 2 | 6.24E-03 | -2.04 | Q8VDZ4-2 |
| Camk2a    | Calcium/calmodulin-dependent protein kinase type II subunit alpha | 341  | S | 23.00406 | 24.99494 | 3 | 6.25E-03 | 1.99  | F8WIS9   |
| Fam219a   | Protein FAM219A                                                   | 85   | T | 22.98238 | 25.84486 | 2 | 6.29E-03 | 2.86  | A2ANP2   |
| Map1b     | Microtubule-associated protein 1B                                 | 888  | S | 22.93772 | 26.18102 | 3 | 6.32E-03 | 3.24  | P14873   |
| Map1a     | Microtubule-associated protein 1A                                 | 2006 | S | 25.06844 | 27.6398  | 3 | 6.51E-03 | 2.57  | A2ARP8   |
| Map1a     | Microtubule-associated protein 1A                                 | 2010 | S | 25.06844 | 27.6398  | 3 | 6.51E-03 | 2.57  | A2ARP8   |
| Stk32c    | Serine/threonine-protein kinase 32C                               | 17   | S | 21.55384 | 26.36558 | 1 | 6.57E-03 | 4.81  | Q8QZV4   |
| Vat1l     | Synaptic vesicle membrane protein VAT-1 homolog-like              | 394  | S | 27.64078 | 29.72896 | 3 | 6.67E-03 | 2.09  | Q80TB8   |
| Vat1l     | Synaptic vesicle membrane protein VAT-1 homolog-like              | 391  | T | 27.64078 | 29.72896 | 3 | 6.67E-03 | 2.09  | Q80TB8   |
| Cers2     | Ceramide synthase 2                                               | 346  | T | 22.13126 | 25.6424  | 3 | 6.74E-03 | 3.51  | Q924Z4   |
| Nrcam     | Neuronal cell adhesion molecule                                   | 1247 | S | 21.8295  | 25.32642 | 2 | 6.89E-03 | 3.50  | Q810U4-3 |
| Arhgap32  | Rho GTPase-activating protein 32                                  | 360  | S | 21.20414 | 25.1296  | 2 | 7.05E-03 | 3.93  | Q811P8-2 |
| Pclo      | Protein piccolo                                                   | 860  | T | 22.74114 | 25.38926 | 2 | 7.09E-03 | 2.65  | Q9QYX7   |
| Gnl1      | Guanine nucleotide-binding protein-like 1                         | 51   | S | 26.00072 | 27.5241  | 2 | 7.13E-03 | 1.52  | P36916   |
| Cers2     | Ceramide synthase 2                                               | 349  | S | 21.99988 | 25.6424  | 3 | 7.15E-03 | 3.64  | Q924Z4   |
| Ranbp2    | E3 SUMO-protein ligase RanBP2                                     | 2729 | S | 21.66282 | 26.82876 | 1 | 7.15E-03 | 5.17  | Q9ERU9   |
| Snx11     | Sorting nexin-11                                                  | 194  | S | 22.5621  | 26.25084 | 2 | 7.17E-03 | 3.69  | Q91WL6   |
| Gripap1   | GRIP1-associated protein 1                                        | 606  | S | 21.69976 | 23.08722 | 1 | 7.17E-03 | 1.39  | A2AEW9   |
| Kidins220 | kinase D-interacting substrate 220                                | 1551 | T | 22.38344 | 24.21764 | 2 | 7.20E-03 | 1.83  | E9Q9B7   |
| Fam171a2  | Protein FAM171A2                                                  | 604  | S | 24.80246 | 21.57824 | 2 | 7.28E-03 | -3.22 | A2A699-2 |
| Svop      | Synaptic vesicle 2-related protein                                | 546  | S | 21.43808 | 23.8349  | 2 | 7.39E-03 | 2.40  | Q8BFT9   |
| Mff       | Mitochondrial fission factor                                      | 151  | S | 25.3269  | 26.7452  | 2 | 7.46E-03 | 1.42  | Q6PCP5   |
| Mbp       | Myelin basic protein                                              | 46   | T | 21.83494 | 24.32478 | 2 | 7.53E-03 | 2.49  | F7A0B0   |
| Ank2      | Ankyrin-2                                                         | 3764 | S | 26.20374 | 26.86604 | 3 | 7.55E-03 | 0.66  | Q8C8R3-4 |
| Ank2      | Ankyrin-2                                                         | 3760 | S | 26.20374 | 26.86604 | 3 | 7.55E-03 | 0.66  | Q8C8R3-4 |
| Ank2      | Ankyrin-2                                                         | 3756 | T | 26.20374 | 26.86604 | 3 | 7.55E-03 | 0.66  | Q8C8R3-4 |

|                        |                                                                          |      |   |          |          |   |          |       |            |
|------------------------|--------------------------------------------------------------------------|------|---|----------|----------|---|----------|-------|------------|
| Ank2                   | Ankyrin-2                                                                | 3759 | T | 26.20374 | 26.86604 | 3 | 7.55E-03 | 0.66  | Q8C8R3-4   |
| Fam219a                | Protein FAM219A                                                          | 87   | S | 22.7684  | 25.84486 | 2 | 7.57E-03 | 3.08  | A2ANP2     |
| Dmtn                   | Dematin                                                                  | 11   | S | 21.31788 | 22.94036 | 2 | 7.60E-03 | 1.62  | Q9WV69     |
| Slc12a5                | Solute carrier family 12 member 5                                        | 1044 | S | 26.70182 | 22.20638 | 1 | 7.60E-03 | -4.50 | Q91V14     |
| Pagr1a                 | PAXIP1-associated glutamate-rich protein 1A                              | 142  | S | 22.09024 | 24.0513  | 3 | 7.64E-03 | 1.96  | Q99L02     |
| Cep170b                | Centrosomal protein of 170 kDa protein B                                 | 478  | S | 21.3236  | 23.35406 | 1 | 7.65E-03 | 2.03  | Q80U49     |
| Arhgap32               | Rho GTPase-activating protein 32                                         | 363  | S | 21.23992 | 24.27832 | 3 | 7.74E-03 | 3.04  | Q811P8-2   |
| Rasgrf1                | Ras-specific guanine nucleotide-releasing factor 1                       | 837  | S | 22.22296 | 25.02336 | 3 | 7.77E-03 | 2.80  | P27671     |
| Epb4.111;Epb4111       | Band 4.1-like protein 1                                                  | 466  | S | 23.15678 | 21.26984 | 1 | 7.82E-03 | -1.89 | A2AUK5     |
| Map1a                  | Microtubule-associated protein 1A;MAP1A heavy chain;MAP1 light chain LC2 | 2000 | S | 24.16148 | 27.62436 | 3 | 7.82E-03 | 3.46  | A2ARP8     |
| Mfap1                  | Microfibrillar-associated protein 1                                      | 52   | S | 24.49378 | 26.6004  | 2 | 7.85E-03 | 2.11  | Q9CQU1     |
| Mfap1                  | Microfibrillar-associated protein 1                                      | 53   | S | 24.49378 | 26.6004  | 2 | 7.85E-03 | 2.11  | Q9CQU1     |
| Cers2                  | Ceramide synthase 2                                                      | 348  | S | 22.3003  | 25.6424  | 3 | 7.86E-03 | 3.34  | Q924Z4     |
| 2310035C23Rik;Kiaa1468 | LisH domain and HEAT repeat-containing protein KIAA1468                  | 243  | S | 28.20074 | 22.26164 | 1 | 7.95E-03 | 5.94  | A0A087WRM8 |
| Lpar1                  | Lysophosphatidic acid receptor 1                                         | 333  | T | 21.84402 | 24.10924 | 2 | 8.03E-03 | 2.27  | P61793-2   |
| Mtmr2                  | Myotubularin-related protein 2                                           | 6    | S | 21.90464 | 24.48588 | 3 | 8.13E-03 | 2.58  | Q9Z2D1     |
| Map2                   | Microtubule-associated protein 2                                         | 1781 | T | 24.81142 | 21.18818 | 1 | 8.30E-03 | -3.62 | P20357     |
| G3bp2                  | Ras GTPase-activating protein-binding protein 2                          | 225  | S | 21.52364 | 24.2242  | 1 | 8.37E-03 | 2.70  | P97379-2   |
| Sorbs2                 | Sorbin and SH3 domain-containing protein 2                               | 494  | S | 21.88858 | 24.82596 | 1 | 8.40E-03 | 2.94  | Q3UTJ2-2   |
| A830010M20Rik;Kiaa1107 | Uncharacterized protein KIAA1107                                         | 783  | S | 25.79398 | 27.1359  | 2 | 8.46E-03 | 1.34  | G3X9V7     |
| A830010M20Rik;Kiaa1107 | Uncharacterized protein KIAA1107                                         | 785  | S | 25.79398 | 27.1359  | 2 | 8.46E-03 | 1.34  | G3X9V7     |
| Dpysl3                 | Dihydropyrimidinase-related protein 3                                    | 677  | S | 21.65326 | 26.61428 | 2 | 8.49E-03 | 4.96  | E9PWE8     |
| Tmpo                   | thymopoietin                                                             | 74   | T | 21.943   | 23.61936 | 2 | 8.55E-03 | 1.68  | Q61033-2   |
| Begain                 | Brain-enriched guanylate kinase-associated protein                       | 298  | S | 21.78756 | 24.92276 | 2 | 8.56E-03 | 3.14  | A0A087WQY4 |
| Pclo                   | Protein piccolo                                                          | 856  | S | 23.01246 | 25.38926 | 2 | 8.57E-03 | 2.38  | Q9QYX7     |
| Fam169a                | Soluble lamin-associated protein of 75 kDa                               | 610  | S | 22.65038 | 25.72956 | 3 | 8.60E-03 | 3.08  | Q5XG69     |
| Snip1                  | Smad nuclear-interacting protein 1                                       | 50   | S | 21.35408 | 23.40528 | 2 | 8.64E-03 | 2.05  | Q8BIZ6     |
| Slc12a5                | Solute carrier family 12 member 5                                        | 57   | T | 26.50146 | 22.55398 | 2 | 8.65E-03 | -3.95 | Q91V14     |
| Map2                   | Microtubule-associated protein 2                                         | 1145 | S | 27.58234 | 28.56712 | 3 | 8.76E-03 | 0.98  | P20357     |
| Map1b                  | Microtubule-associated protein 1B                                        | 1325 | S | 21.14108 | 27.70624 | 2 | 8.83E-03 | 6.57  | P14873     |
| Slc9a1                 | Sodium/hydrogen exchanger 1                                              | 730  | S | 27.18352 | 23.71112 | 2 | 8.83E-03 | -3.47 | Q61165     |

|               |                                                                |      |   |          |          |   |          |       |          |
|---------------|----------------------------------------------------------------|------|---|----------|----------|---|----------|-------|----------|
| Rpap3         | RNA polymerase II-associated protein 3                         | 117  | S | 22.05378 | 24.44852 | 3 | 8.85E-03 | 2.39  | Q9D706   |
| Scn2a1        | Sodium channel protein                                         | 558  | S | 21.75736 | 25.2653  | 2 | 8.96E-03 | 3.51  | B1AWN6   |
| Kcnt1         | Potassium channel subfamily T member 1                         | 47   | S | 21.60344 | 23.61418 | 2 | 9.07E-03 | 2.01  | A2AHB6   |
| Dnm1          | Dynamamin-1                                                    | 851  | S | 23.75788 | 27.32808 | 1 | 9.28E-03 | 3.57  | P39053-4 |
| Map2          | Microtubule-associated protein 2                               | 1620 | T | 27.17254 | 29.58212 | 2 | 9.32E-03 | 2.41  | P20357   |
| Map2          | Microtubule-associated protein 2                               | 1623 | T | 27.17254 | 29.58212 | 2 | 9.32E-03 | 2.41  | P20357   |
| Csnk1d        | Casein kinase I isoform delta                                  | 383  | S | 21.66004 | 23.8197  | 2 | 9.34E-03 | 2.16  | Q9DC28-2 |
| Csnk1d        | Casein kinase I isoform delta                                  | 384  | S | 21.38128 | 23.7796  | 2 | 9.35E-03 | 2.40  | Q9DC28-2 |
| Rplp2         | 60S acidic ribosomal protein P2                                | 102  | S | 21.40472 | 24.91438 | 2 | 9.37E-03 | 3.51  | P99027   |
| Mark4         | MAP/microtubule affinity-regulating kinase 4                   | 2    | S | 21.6819  | 23.36052 | 2 | 9.48E-03 | 1.68  | Q8CIP4   |
| Gm10108;Cy cs | Cytochrome c, somatic                                          | 48   | S | 21.47282 | 22.94844 | 1 | 9.51E-03 | 1.48  | G3UWG1   |
| Rlim          | E3 ubiquitin-protein ligase RLIM                               | 229  | S | 21.27094 | 22.90822 | 2 | 9.52E-03 | 1.64  | Q9WTV7   |
| Pbxip1        | Pre-B-cell leukemia transcription factor-interacting protein 1 | 149  | S | 20.97976 | 23.20448 | 3 | 9.60E-03 | 2.22  | D3YUE1   |
| Kcnd3         | Potassium voltage-gated channel subfamily D member 3           | 153  | S | 24.86112 | 25.4231  | 1 | 9.61E-03 | 0.56  | Q9Z0V1   |
| Rasgrf1       | Ras-specific guanine nucleotide-releasing factor 1             | 852  | T | 21.71096 | 25.02336 | 3 | 9.73E-03 | 3.31  | P27671   |
| Slc9a1        | Sodium/hydrogen exchanger 1                                    | 727  | S | 22.82828 | 26.48262 | 1 | 9.79E-03 | 3.65  | Q61165   |
| Myo18a        | Unconventional myosin-XVIIIa                                   | 2037 | S | 26.2124  | 27.47928 | 2 | 9.84E-03 | 1.27  | Q9JMH9   |
| Myo18a        | Unconventional myosin-XVIIIa                                   | 2039 | S | 26.2124  | 27.47928 | 2 | 9.84E-03 | 1.27  | Q9JMH9   |
| Map1b         | Microtubule-associated protein 1B                              | 905  | T | 22.70568 | 26.18102 | 3 | 9.87E-03 | 3.48  | P14873   |
| Cspg5         | Chondroitin sulfate proteoglycan 5                             | 465  | T | 22.8948  | 21.4166  | 1 | 9.91E-03 | -1.48 | Q71M36   |

**Supplemental Table 2: Microarray analyses of laser-capture-microdissected ARC from HFD-fed Dusp8 WT and KO mice.** By microarray analysis a set of 893 significantly regulated genes was defined by the following criteria: limma t-test p-value < 0.05, linear fold-change>1.3x, and detection p-value <0.05 in at least half of the samples in at least one group.

| Symbol    | Gene name                                                                                                       | Illumina PROBE_ID | Linear average expression Dusp8 KO | Linear average expression WT | Linear fold-change, Dusp8 KO vs WT |
|-----------|-----------------------------------------------------------------------------------------------------------------|-------------------|------------------------------------|------------------------------|------------------------------------|
| Mup1      | Mus musculus major urinary protein 1 (Mup1), mRNA.                                                              | ILMN_2875730      | 148                                | 25                           | 5.91                               |
| Mup2      | Mus musculus major urinary protein 2 (Mup2), transcript variant 1, mRNA.                                        | ILMN_3143404      | 96                                 | 20                           | 4.90                               |
| Mup20     | major urinary protein 20                                                                                        | ILMN_2881950      | 56                                 | 12                           | 4.75                               |
| Apoa2     | apolipoprotein A-II [Source:MGI Symbol;Acc:MGI:88050]                                                           | ILMN_1247156      | 45                                 | 11                           | 4.22                               |
| Serpina1b | serine (or cysteine) preptidase inhibitor, clade A, member 1B [Source:MGI Symbol;Acc:MGI:891970]                | ILMN_2659680      | 53                                 | 13                           | 4.07                               |
| Serpina1b | serine (or cysteine) preptidase inhibitor, clade A, member 1B [Source:MGI Symbol;Acc:MGI:891970]                | ILMN_1215859      | 60                                 | 15                           | 3.88                               |
| Pvalb     | parvalbumin [Source:MGI Symbol;Acc:MGI:97821]                                                                   | ILMN_1218223      | 79                                 | 20                           | 3.86                               |
| Mup2      | Mus musculus major urinary protein 2 (Mup2), transcript variant 1, mRNA.                                        | ILMN_3065459      | 76                                 | 23                           | 3.37                               |
| Serpina1c | serine (or cysteine) peptidase inhibitor, clade A, member 1C [Source:MGI Symbol;Acc:MGI:891969]                 | ILMN_3004600      | 54                                 | 17                           | 3.28                               |
| Ccdc151   | coiled-coil domain containing 151 [Source:MGI Symbol;Acc:MGI:1924859]                                           | ILMN_2987394      | 95                                 | 30                           | 3.15                               |
| Mup5      | major urinary protein 5 [Source:MGI Symbol;Acc:MGI:104974]                                                      | ILMN_3158509      | 45                                 | 14                           | 3.08                               |
| Ttyh2     | tweety family member 2 [Source:MGI Symbol;Acc:MGI:2157091]                                                      | ILMN_2522155      | 74                                 | 25                           | 2.94                               |
| Syt12     | synaptotagmin XII [Source:MGI Symbol;Acc:MGI:2159601]                                                           | ILMN_1246560      | 56                                 | 20                           | 2.78                               |
| Evi2a     | ecotropic viral integration site 2a [Source:MGI Symbol;Acc:MGI:95458]                                           | ILMN_1251669      | 74                                 | 28                           | 2.61                               |
| Plekhf2   | pleckstrin homology domain containing, family F (with FYVE domain) member 2 [Source:MGI Symbol;Acc:MGI:1919051] | ILMN_2798694      | 81                                 | 31                           | 2.61                               |
| Supv311   | suppressor of var1, 3-like 1 (S. cerevisiae) [Source:MGI Symbol;Acc:MGI:2441711]                                | ILMN_2618745      | 113                                | 44                           | 2.60                               |
| Cyp2e1    | cytochrome P450, family 2, subfamily e, polypeptide 1 [Source:MGI Symbol;Acc:MGI:88607]                         | ILMN_2687014      | 38                                 | 15                           | 2.60                               |
| Krtap19-4 | keratin associated protein 19-4 [Source:MGI Symbol;Acc:MGI:2157757]                                             | ILMN_2645563      | 48                                 | 19                           | 2.58                               |
| Zic1      | zinc finger protein of the cerebellum 1 [Source:MGI Symbol;Acc:MGI:106683]                                      | ILMN_2491186      | 153                                | 59                           | 2.58                               |
| Caap1     | caspase activity and apoptosis inhibitor 1 [Source:MGI Symbol;Acc:MGI:1915020]                                  | ILMN_1217473      | 80                                 | 31                           | 2.57                               |
| Trim59    | tripartite motif-containing 59 [Source:MGI Symbol;Acc:MGI:1914199]                                              | ILMN_2993661      | 85                                 | 33                           | 2.56                               |
| Matn1     | matrilin 1, cartilage matrix protein [Source:MGI Symbol;Acc:MGI:106591]                                         | ILMN_1219993      | 36                                 | 14                           | 2.50                               |
| Ggct      | gamma-glutamyl cyclotransferase [Source:MGI Symbol;Acc:MGI:95700]                                               | ILMN_2766493      | 100                                | 40                           | 2.50                               |



|               |                                                                                                                         |              |     |    |      |
|---------------|-------------------------------------------------------------------------------------------------------------------------|--------------|-----|----|------|
| Lgi3          | leucine-rich repeat LGI family, member 3 [Source:MGI Symbol;Acc:MGI:2182619]                                            | ILMN_2994995 | 53  | 21 | 2.48 |
| Nfkbid        | nuclear factor of kappa light polypeptide gene enhancer in B cells inhibitor, delta [Source:MGI Symbol;Acc:MGI:3041243] | ILMN_1225192 | 60  | 24 | 2.47 |
| Eva1b         | eva-1 homolog B (C. elegans)                                                                                            | ILMN_2890357 | 38  | 16 | 2.33 |
| Serpina1a     | serine (or cysteine) peptidase inhibitor, clade A, member 1A [Source:MGI Symbol;Acc:MGI:891971]                         | ILMN_1225699 | 39  | 17 | 2.32 |
| Clk3          | CDC-like kinase 3 [Source:MGI Symbol;Acc:MGI:1098670]                                                                   | ILMN_2801404 | 50  | 22 | 2.32 |
| Ghrl          | ghrelin [Source:MGI Symbol;Acc:MGI:1930008]                                                                             | ILMN_2643658 | 37  | 16 | 2.32 |
| Adh1          | alcohol dehydrogenase 1 (class I) [Source:MGI Symbol;Acc:MGI:87921]                                                     | ILMN_2850077 | 29  | 13 | 2.29 |
| Mup4          | major urinary protein 4 [Source:MGI Symbol;Acc:MGI:97236]                                                               | ILMN_2592166 | 36  | 16 | 2.28 |
| Itsn1         | intersectin 1 (SH3 domain protein 1A) [Source:MGI Symbol;Acc:MGI:1338069]                                               | ILMN_2627268 | 42  | 18 | 2.27 |
| Pck1          | phosphoenolpyruvate carboxykinase 1, cytosolic [Source:MGI Symbol;Acc:MGI:97501]                                        | ILMN_1213632 | 104 | 46 | 2.26 |
| Atg4d         | autophagy related 4D, cysteine peptidase [Source:MGI Symbol;Acc:MGI:2444308]                                            | ILMN_2601710 | 32  | 14 | 2.26 |
| 3110040N11Rik | RIKEN cDNA 3110040N11 gene [Source:MGI Symbol;Acc:MGI:1914540]                                                          | ILMN_1255496 | 53  | 23 | 2.24 |
| Serpina1a     | serine (or cysteine) peptidase inhibitor, clade A, member 1A [Source:MGI Symbol;Acc:MGI:891971]                         | ILMN_2777493 | 37  | 17 | 2.23 |
| Rnf150        | ring finger protein 150 [Source:MGI Symbol;Acc:MGI:2443860]                                                             | ILMN_3032501 | 45  | 20 | 2.22 |
| Pdlim5        | PDZ and LIM domain 5 [Source:MGI Symbol;Acc:MGI:1927489]                                                                | ILMN_2771219 | 40  | 18 | 2.22 |
| Naa16         | N(alpha)-acetyltransferase 16, NatA auxiliary subunit [Source:MGI Symbol;Acc:MGI:1914147]                               | ILMN_2956741 | 44  | 20 | 2.21 |
| Ptpmt1        | protein tyrosine phosphatase, mitochondrial 1 [Source:MGI Symbol;Acc:MGI:1913711]                                       | ILMN_2602406 | 123 | 56 | 2.20 |
| Kcnmb2        | potassium large conductance calcium-activated channel, subfamily M, beta member 2 [Source:MGI Symbol;Acc:MGI:1919663]   | ILMN_1259717 | 32  | 15 | 2.18 |
| Acadvl        | acyl-Coenzyme A dehydrogenase, very long chain [Source:MGI Symbol;Acc:MGI:895149]                                       | ILMN_2956932 | 36  | 17 | 2.17 |
| Gdf9          | growth differentiation factor 9 [Source:MGI Symbol;Acc:MGI:95692]                                                       | ILMN_1225090 | 30  | 14 | 2.17 |
| Gnpda1        | glucosamine-6-phosphate deaminase 1 [Source:MGI Symbol;Acc:MGI:1347054]                                                 | ILMN_2750548 | 80  | 37 | 2.16 |
| Mpped1        | metallophosphoesterase domain containing 1 [Source:MGI Symbol;Acc:MGI:106316]                                           | ILMN_2760540 | 38  | 18 | 2.15 |
| Lcorl         | ligand dependent nuclear receptor corepressor-like [Source:MGI Symbol;Acc:MGI:2651932]                                  | ILMN_1238589 | 32  | 15 | 2.15 |
| Cdh11         | cadherin 11 [Source:MGI Symbol;Acc:MGI:99217]                                                                           | ILMN_2737073 | 27  | 13 | 2.12 |
| Usp9x         | ubiquitin specific peptidase 9, X chromosome [Source:MGI Symbol;Acc:MGI:894681]                                         | ILMN_2503651 | 42  | 20 | 2.11 |

|          |                                                                                                                                       |              |    |    |      |
|----------|---------------------------------------------------------------------------------------------------------------------------------------|--------------|----|----|------|
| Dnajc24  | DnaJ heat shock protein family (Hsp40) member C24 [Source:MGI Symbol;Acc:MGI:1919522]                                                 | ILMN_2839310 | 32 | 15 | 2.11 |
| Alb      | albumin [Source:MGI Symbol;Acc:MGI:87991]                                                                                             | ILMN_2651160 | 28 | 13 | 2.10 |
| Srprb    | Mus musculus signal recognition particle receptor, B subunit (Srprb), mRNA.                                                           | ILMN_1244768 | 40 | 19 | 2.09 |
| Aldob    | aldolase B, fructose-bisphosphate [Source:MGI Symbol;Acc:MGI:87995]                                                                   | ILMN_1224012 | 72 | 34 | 2.08 |
| Rtn1     | reticulon 1 [Source:MGI Symbol;Acc:MGI:1933947]                                                                                       | ILMN_3040710 | 61 | 29 | 2.08 |
| Zcchc11  | zinc finger, CCHC domain containing 11 [Source:MGI Symbol;Acc:MGI:2445126]                                                            | ILMN_1231967 | 29 | 14 | 2.07 |
| Arpc3    | actin related protein 2/3 complex, subunit 3 [Source:MGI Symbol;Acc:MGI:1928375]                                                      | ILMN_2603725 | 63 | 31 | 2.06 |
| Egfl7    | Mus musculus EGF-like domain 7 (Egfl7), transcript variant c, mRNA.                                                                   | ILMN_3163288 | 41 | 20 | 2.06 |
| Fbxo32   | F-box protein 32 [Source:MGI Symbol;Acc:MGI:1914981]                                                                                  | ILMN_2752994 | 43 | 21 | 2.06 |
| Pex5l    | peroxisomal biogenesis factor 5-like [Source:MGI Symbol;Acc:MGI:1916672]                                                              | ILMN_2617930 | 33 | 16 | 2.05 |
| Hira     | histone cell cycle regulator                                                                                                          | ILMN_2651880 | 32 | 16 | 2.04 |
| Mfsd7c   | major facilitator superfamily domain containing 7C [Source:MGI Symbol;Acc:MGI:2384974]                                                | ILMN_1248190 | 55 | 27 | 2.04 |
| Myg1     | melanocyte proliferating gene 1 [Source:MGI Symbol;Acc:MGI:1929864]                                                                   | ILMN_1219703 | 28 | 14 | 2.04 |
| Hbp1     | high mobility group box transcription factor 1 [Source:MGI Symbol;Acc:MGI:894659]                                                     | ILMN_1230323 | 50 | 25 | 2.03 |
| Tmem120b | transmembrane protein 120B [Source:MGI Symbol;Acc:MGI:3603158]                                                                        | ILMN_2909283 | 38 | 19 | 2.03 |
| Mfng     | MFNG O-fucosylpeptide 3-beta-N-acetylglucosaminyltransferase [Source:MGI Symbol;Acc:MGI:1095404]                                      | ILMN_2687661 | 44 | 21 | 2.03 |
| Edn1     | endothelin 1 [Source:MGI Symbol;Acc:MGI:95283]                                                                                        | ILMN_2737713 | 38 | 18 | 2.03 |
| Gsta3    | glutathione S-transferase, alpha 3 [Source:MGI Symbol;Acc:MGI:95856]                                                                  | ILMN_1241437 | 70 | 34 | 2.03 |
| Mettl1   | methyltransferase like 1 [Source:MGI Symbol;Acc:MGI:1339986]                                                                          | ILMN_2732419 | 36 | 18 | 2.02 |
| Iah1     | isoamyl acetate-hydrolyzing esterase 1 homolog [Source:MGI Symbol;Acc:MGI:1914982]                                                    | ILMN_2620803 | 26 | 13 | 2.02 |
| Mllt10   | myeloid/lymphoid or mixed-lineage leukemia; translocated to, 10 [Source:MGI Symbol;Acc:MGI:1329038]                                   | ILMN_2630536 | 82 | 41 | 2.01 |
| Dennd5b  | DENN/MADD domain containing 5B [Source:MGI Symbol;Acc:MGI:2444273]                                                                    | ILMN_2700354 | 71 | 36 | 1.99 |
| Sept6    | septin 6 [Source:MGI Symbol;Acc:MGI:1888939]                                                                                          | ILMN_2992517 | 68 | 34 | 1.99 |
| Ankrd49  | ankyrin repeat domain 49 [Source:MGI Symbol;Acc:MGI:1930842]                                                                          | ILMN_2592358 | 70 | 35 | 1.99 |
| Smardc3  | SWI/SNF related, matrix associated, actin dependent regulator of chromatin, subfamily d, member 3 [Source:MGI Symbol;Acc:MGI:1914243] | ILMN_1248397 | 41 | 21 | 1.99 |
| Zfx4     | zinc finger homeodomain 4 [Source:MGI Symbol;Acc:MGI:2137668]                                                                         | ILMN_2520592 | 48 | 24 | 1.99 |
| Fhad1    | forkhead-associated (FHA) phosphopeptide binding domain 1 [Source:MGI Symbol;Acc:MGI:1920323]                                         | ILMN_3000155 | 45 | 23 | 1.97 |

|          |                                                                                                              |              |     |    |      |
|----------|--------------------------------------------------------------------------------------------------------------|--------------|-----|----|------|
| Tmem51   | transmembrane protein 51 [Source:MGI Symbol;Acc:MGI:2384874]                                                 | ILMN_2589741 | 75  | 38 | 1.97 |
| Vps26a   | VPS26 retromer complex component A [Source:MGI Symbol;Acc:MGI:1353654]                                       | ILMN_1251809 | 29  | 15 | 1.96 |
| Plin3    | perilipin 3 [Source:MGI Symbol;Acc:MGI:1914155]                                                              | ILMN_1245528 | 97  | 50 | 1.96 |
| Etfα     | electron transferring flavoprotein, alpha polypeptide [Source:MGI Symbol;Acc:MGI:106092]                     | ILMN_2649966 | 146 | 75 | 1.95 |
| Tref1    | transcriptional regulating factor 1 [Source:MGI Symbol;Acc:MGI:2442086]                                      | ILMN_1227770 | 89  | 46 | 1.94 |
| Map2k3   | mitogen-activated protein kinase kinase 3 [Source:MGI Symbol;Acc:MGI:1346868]                                | ILMN_2659644 | 30  | 15 | 1.94 |
| Irf6     | interferon regulatory factor 6 [Source:MGI Symbol;Acc:MGI:1859211]                                           | ILMN_1216279 | 27  | 14 | 1.94 |
| Mcm2     | minichromosome maintenance complex component 2 [Source:MGI Symbol;Acc:MGI:105380]                            | ILMN_1250907 | 31  | 16 | 1.94 |
| Ppfp2    | PTPRF interacting protein, binding protein 2 (liprin beta 2) [Source:MGI Symbol;Acc:MGI:894649]              | ILMN_2760001 | 31  | 16 | 1.94 |
| Rad23a   | RAD23 homolog A, nucleotide excision repair protein [Source:MGI Symbol;Acc:MGI:105126]                       | ILMN_2637052 | 120 | 62 | 1.94 |
| Mdm1     | transformed mouse 3T3 cell double minute 1 [Source:MGI Symbol;Acc:MGI:96951]                                 | ILMN_2727628 | 34  | 18 | 1.94 |
| Trnaulap | tRNA selenocysteine 1 associated protein 1 [Source:MGI Symbol;Acc:MGI:1919037]                               | ILMN_2595530 | 78  | 40 | 1.93 |
| Bcl11b   | B cell leukemia/lymphoma 11B [Source:MGI Symbol;Acc:MGI:1929913]                                             | ILMN_2611022 | 44  | 23 | 1.93 |
| Mrpl46   | mitochondrial ribosomal protein L46                                                                          | ILMN_2740922 | 84  | 43 | 1.93 |
| Pex26    | peroxisomal biogenesis factor 26 [Source:MGI Symbol;Acc:MGI:1921293]                                         | ILMN_2652077 | 40  | 21 | 1.93 |
| Tln1     | talin 1 [Source:MGI Symbol;Acc:MGI:1099832]                                                                  | ILMN_2605679 | 47  | 25 | 1.93 |
| Rad23a   | RAD23 homolog A, nucleotide excision repair protein [Source:MGI Symbol;Acc:MGI:105126]                       | ILMN_1216295 | 138 | 72 | 1.92 |
| Dcps     | decapping enzyme, scavenger [Source:MGI Symbol;Acc:MGI:1916555]                                              | ILMN_2720770 | 38  | 20 | 1.92 |
| Kcnab3   | potassium voltage-gated channel, shaker-related subfamily, beta member 3 [Source:MGI Symbol;Acc:MGI:1336208] | ILMN_2655386 | 32  | 17 | 1.91 |
| Ufsp2    | UFM1-specific peptidase 2 [Source:MGI Symbol;Acc:MGI:1913679]                                                | ILMN_2717569 | 33  | 17 | 1.91 |
| Mtmr14   | myotubularin related protein 14 [Source:MGI Symbol;Acc:MGI:1916075]                                          | ILMN_2689062 | 33  | 17 | 1.91 |
| Olfm3    | olfactomedin 3 [Source:MGI Symbol;Acc:MGI:2387329]                                                           | ILMN_2710095 | 44  | 23 | 1.91 |
| Eif4a3   | eukaryotic translation initiation factor 4A3 [Source:MGI Symbol;Acc:MGI:1923731]                             | ILMN_2588254 | 54  | 28 | 1.90 |
| Rabac1   | Rab acceptor 1 (prenylated) [Source:MGI Symbol;Acc:MGI:1201692]                                              | ILMN_2710112 | 51  | 27 | 1.90 |
| Gpr68    | G protein-coupled receptor 68 [Source:MGI Symbol;Acc:MGI:2441763]                                            | ILMN_2732996 | 32  | 17 | 1.90 |
| Phf11d   | PHD finger protein 11D [Source:MGI Symbol;Acc:MGI:1277133]                                                   | ILMN_2684848 | 22  | 12 | 1.90 |
| Thtpa    | thiamine triphosphatase [Source:MGI Symbol;Acc:MGI:2446078]                                                  | ILMN_2794825 | 86  | 45 | 1.90 |

|               |                                                                                                                 |              |     |    |      |
|---------------|-----------------------------------------------------------------------------------------------------------------|--------------|-----|----|------|
| Als2          | amyotrophic lateral sclerosis 2 (juvenile) [Source:MGI Symbol;Acc:MGI:1921268]                                  | ILMN_2620053 | 71  | 37 | 1.90 |
| Zdhhc15       | zinc finger, DHHC domain containing 15 [Source:MGI Symbol;Acc:MGI:1915336]                                      | ILMN_2798576 | 24  | 13 | 1.89 |
| Trim33        | tripartite motif-containing 33 [Source:MGI Symbol;Acc:MGI:2137357]                                              | ILMN_1259222 | 64  | 34 | 1.89 |
| E430018J23Rik | RIKEN cDNA E430018J23 gene                                                                                      | ILMN_2881039 | 23  | 12 | 1.89 |
| Arc           | activity regulated cytoskeletal-associated protein [Source:MGI Symbol;Acc:MGI:88067]                            | ILMN_2597827 | 31  | 17 | 1.88 |
| P2rx4         | purinergic receptor P2X, ligand-gated ion channel 4 [Source:MGI Symbol;Acc:MGI:1338859]                         | ILMN_1237644 | 25  | 13 | 1.88 |
| Elm1          | engulfment and cell motility 1 [Source:MGI Symbol;Acc:MGI:2153044]                                              | ILMN_1235672 | 27  | 14 | 1.88 |
| Taf11         | TATA-box binding protein associated factor 11 [Source:MGI Symbol;Acc:MGI:1916026]                               | ILMN_2946281 | 111 | 59 | 1.88 |
| Abhd5         | abhydrolase domain containing 5 [Source:MGI Symbol;Acc:MGI:1914719]                                             | ILMN_2739295 | 54  | 29 | 1.88 |
| Pank4         | pantothenate kinase 4 [Source:MGI Symbol;Acc:MGI:2387466]                                                       | ILMN_2644140 | 62  | 33 | 1.87 |
| Slc24a2       | solute carrier family 24 (sodium/potassium/calcium exchanger), member 2 [Source:MGI Symbol;Acc:MGI:1923626]     | ILMN_1216404 | 179 | 96 | 1.87 |
| Mustn1        | musculoskeletal, embryonic nuclear protein 1 [Source:MGI Symbol;Acc:MGI:1913425]                                | ILMN_2658461 | 47  | 25 | 1.86 |
| Plekhf2       | pleckstrin homology domain containing, family F (with FYVE domain) member 2 [Source:MGI Symbol;Acc:MGI:1919051] | ILMN_1237736 | 28  | 15 | 1.86 |
| Pard3         | par-3 family cell polarity regulator [Source:MGI Symbol;Acc:MGI:2135608]                                        | ILMN_2648709 | 34  | 18 | 1.86 |
| Srsf1         | serine/arginine-rich splicing factor 1                                                                          | ILMN_3142235 | 147 | 79 | 1.86 |
| Akap9         | A kinase (PRKA) anchor protein (yotiao) 9 [Source:MGI Symbol;Acc:MGI:2178217]                                   | ILMN_2678495 | 91  | 49 | 1.86 |
| H13           | histocompatibility 13 [Source:MGI Symbol;Acc:MGI:95886]                                                         | ILMN_2742160 | 43  | 23 | 1.86 |
| Pou2f1        | POU domain, class 2, transcription factor 1 [Source:MGI Symbol;Acc:MGI:101898]                                  | ILMN_2718359 | 27  | 15 | 1.85 |
| Cryz1         | crystallin, zeta (quinone reductase)-like 1 [Source:MGI Symbol;Acc:MGI:1913859]                                 | ILMN_2648695 | 73  | 40 | 1.85 |
| Stard4        | StAR-related lipid transfer (START) domain containing 4 [Source:MGI Symbol;Acc:MGI:2156764]                     | ILMN_1240445 | 28  | 15 | 1.85 |
| Gm10146       | predicted gene 10146                                                                                            | ILMN_1233901 | 20  | 11 | 1.85 |
| Shisa7        | shisa family member 7 [Source:MGI Symbol;Acc:MGI:3605641]                                                       | ILMN_2606540 | 63  | 34 | 1.84 |
| Bex2          | brain expressed X-linked 2 [Source:MGI Symbol;Acc:MGI:1338017]                                                  | ILMN_3143078 | 104 | 57 | 1.84 |
| Lrpprc        | leucine-rich PPR-motif containing [Source:MGI Symbol;Acc:MGI:1919666]                                           | ILMN_2845208 | 32  | 17 | 1.84 |
| Glr3          | glutaredoxin 3 [Source:MGI Symbol;Acc:MGI:1353653]                                                              | ILMN_2925066 | 59  | 32 | 1.83 |
| Trim66        | tripartite motif-containing 66 [Source:MGI Symbol;Acc:MGI:2152406]                                              | ILMN_1249793 | 23  | 13 | 1.82 |
| Smdt1         | single-pass membrane protein with aspartate rich tail 1 [Source:MGI                                             | ILMN_2648580 | 35  | 19 | 1.82 |

|               |                                                                                                   |              |     |    |      |
|---------------|---------------------------------------------------------------------------------------------------|--------------|-----|----|------|
|               | Symbol;Acc:MGI:1916279]                                                                           |              |     |    |      |
| Usp9x         | ubiquitin specific peptidase 9, X chromosome [Source:MGI Symbol;Acc:MGI:894681]                   | ILMN_2470287 | 58  | 32 | 1.82 |
| 2610042L04Rik | RIKEN cDNA 2610042L04 gene [Source:MGI Symbol;Acc:MGI:1914305]                                    | ILMN_2814258 | 52  | 29 | 1.82 |
| Kdm1b         | lysine (K)-specific demethylase 1B [Source:MGI Symbol;Acc:MGI:2145261]                            | ILMN_3007898 | 73  | 40 | 1.82 |
| Numb          | numb homolog (Drosophila) [Source:MGI Symbol;Acc:MGI:107423]                                      | ILMN_2727687 | 37  | 20 | 1.81 |
| Cfap65        | cilia and flagella associated protein 65 [Source:MGI Symbol;Acc:MGI:2444274]                      | ILMN_3162084 | 50  | 28 | 1.81 |
| Uprt          | uracil phosphoribosyltransferase [Source:MGI Symbol;Acc:MGI:2685620]                              | ILMN_2936221 | 110 | 61 | 1.81 |
| Dhrs7b        | dehydrogenase/reductase (SDR family) member 7B [Source:MGI Symbol;Acc:MGI:2384931]                | ILMN_3114114 | 84  | 47 | 1.80 |
| Zfp386        | zinc finger protein 386 (Kruppel-like) [Source:MGI Symbol;Acc:MGI:1930708]                        | ILMN_3142440 | 29  | 16 | 1.80 |
| Acsl6         | acyl-CoA synthetase long-chain family member 6 [Source:MGI Symbol;Acc:MGI:894291]                 | ILMN_2621697 | 33  | 18 | 1.79 |
| Ppp1cb        | protein phosphatase 1, catalytic subunit, beta isoform [Source:MGI Symbol;Acc:MGI:104871]         | ILMN_2724066 | 89  | 50 | 1.79 |
| Sorbs3        | sorbin and SH3 domain containing 3 [Source:MGI Symbol;Acc:MGI:700013]                             | ILMN_2618221 | 35  | 20 | 1.79 |
| Dram1         | DNA-damage regulated autophagy modulator 1 [Source:MGI Symbol;Acc:MGI:1918962]                    | ILMN_1219820 | 29  | 16 | 1.78 |
| Bbc3          | BCL2 binding component 3 [Source:MGI Symbol;Acc:MGI:2181667]                                      | ILMN_2920736 | 169 | 95 | 1.78 |
| Gnl3          | guanine nucleotide binding protein-like 3 (nucleolar)                                             | ILMN_2601639 | 94  | 53 | 1.78 |
| Ubxn4         | UBX domain protein 4 [Source:MGI Symbol;Acc:MGI:1915062]                                          | ILMN_2422153 | 35  | 20 | 1.78 |
| Accs          | l-aminocyclopropane-1-carboxylate synthase (non-functional) [Source:MGI Symbol;Acc:MGI:1919717]   | ILMN_2776485 | 37  | 21 | 1.78 |
| 4933434E20Rik | RIKEN cDNA 4933434E20 gene [Source:MGI Symbol;Acc:MGI:1914027]                                    | ILMN_2594807 | 62  | 35 | 1.78 |
| Ddb2          | damage specific DNA binding protein 2 [Source:MGI Symbol;Acc:MGI:1355314]                         | ILMN_2621160 | 23  | 13 | 1.78 |
| Dhx38         | DEAH (Asp-Glu-Ala-His) box polypeptide 38 [Source:MGI Symbol;Acc:MGI:1927617]                     | ILMN_3161767 | 105 | 59 | 1.78 |
| Prkd3         | protein kinase D3 [Source:MGI Symbol;Acc:MGI:1922542]                                             | ILMN_1221007 | 76  | 43 | 1.78 |
| Mtus1         | mitochondrial tumor suppressor 1 [Source:MGI Symbol;Acc:MGI:2142572]                              | ILMN_3162801 | 67  | 38 | 1.78 |
| Zfp763        | zinc finger protein 763 [Source:MGI Symbol;Acc:MGI:1920701]                                       | ILMN_2645368 | 69  | 39 | 1.77 |
| Des           | desmin [Source:MGI Symbol;Acc:MGI:94885]                                                          | ILMN_2836982 | 55  | 31 | 1.77 |
| B3gnt8        | UDP-GlcNAc:betaGal beta-1,3-N-acetylglucosaminyltransferase 8 [Source:MGI Symbol;Acc:MGI:2385269] | ILMN_2614889 | 33  | 19 | 1.77 |
| Ints3         | integrator complex subunit 3 [Source:MGI Symbol;Acc:MGI:2140050]                                  | ILMN_2711570 | 141 | 79 | 1.77 |
| Col6a1        | collagen, type VI, alpha 1 [Source:MGI Symbol;Acc:MGI:88459]                                      | ILMN_2768087 | 39  | 22 | 1.77 |

|          |                                                                                                                              |              |     |     |      |
|----------|------------------------------------------------------------------------------------------------------------------------------|--------------|-----|-----|------|
| Dclre1b  | DNA cross-link repair 1B [Source:MGI Symbol;Acc:MGI:2156057]                                                                 | ILMN_2638404 | 52  | 30  | 1.77 |
| Creb1    | cAMP responsive element binding protein 1 [Source:MGI Symbol;Acc:MGI:88494]                                                  | ILMN_2657709 | 123 | 69  | 1.77 |
| Cnp      | 2',3'-cyclic nucleotide 3' phosphodiesterase [Source:MGI Symbol;Acc:MGI:88437]                                               | ILMN_2802263 | 133 | 75  | 1.77 |
| Numb     | numb homolog (Drosophila) [Source:MGI Symbol;Acc:MGI:107423]                                                                 | ILMN_2727692 | 30  | 17  | 1.77 |
| Mtss1l   | metastasis suppressor 1-like [Source:MGI Symbol;Acc:MGI:3039591]                                                             | ILMN_2635848 | 63  | 36  | 1.76 |
| Raly     | hnRNP-associated with lethal yellow [Source:MGI Symbol;Acc:MGI:97850]                                                        | ILMN_2684494 | 36  | 20  | 1.76 |
| Sec23b   | SEC23 homolog B, COPII coat complex component [Source:MGI Symbol;Acc:MGI:1350925]                                            | ILMN_1245383 | 24  | 13  | 1.76 |
| Ctnnb1   | catenin, beta like 1 [Source:MGI Symbol;Acc:MGI:1913892]                                                                     | ILMN_1249568 | 32  | 18  | 1.76 |
| Ctdspl2  | CTD (carboxy-terminal domain, RNA polymerase II, polypeptide A) small phosphatase like 2 [Source:MGI Symbol;Acc:MGI:1196405] | ILMN_3154869 | 96  | 55  | 1.76 |
| Gnpda1   | glucosamine-6-phosphate deaminase 1 [Source:MGI Symbol;Acc:MGI:1347054]                                                      | ILMN_1228139 | 67  | 38  | 1.76 |
| Vps16    | VSP16 CORVET/HOPS core subunit [Source:MGI Symbol;Acc:MGI:2136772]                                                           | ILMN_1230082 | 40  | 23  | 1.76 |
| Egfl8    | EGF-like domain 8                                                                                                            | ILMN_2593188 | 26  | 15  | 1.75 |
| Babam2   | BRISC and BRCA1 A complex member 2 [Source:MGI Symbol;Acc:MGI:1333875]                                                       | ILMN_3139800 | 33  | 19  | 1.75 |
| Phospho2 | phosphatase, orphan 2 [Source:MGI Symbol;Acc:MGI:1920623]                                                                    | ILMN_2596007 | 40  | 23  | 1.75 |
| Ndrp1    | N-myc downstream regulated gene 1 [Source:MGI Symbol;Acc:MGI:1341799]                                                        | ILMN_1250195 | 46  | 26  | 1.75 |
| Arhgap24 | Rho GTPase activating protein 24 [Source:MGI Symbol;Acc:MGI:1922647]                                                         | ILMN_2728038 | 100 | 57  | 1.74 |
| Osbpl2   | oxysterol binding protein-like 2 [Source:MGI Symbol;Acc:MGI:2442832]                                                         | ILMN_1259132 | 143 | 83  | 1.73 |
| Ccp110   | centriolar coiled coil protein 110 [Source:MGI Symbol;Acc:MGI:2141942]                                                       | ILMN_1224182 | 43  | 25  | 1.73 |
| Ssh2     | slingshot homolog 2 (Drosophila) [Source:MGI Symbol;Acc:MGI:2679255]                                                         | ILMN_2713231 | 45  | 26  | 1.73 |
| Atpaf2   | ATP synthase mitochondrial F1 complex assembly factor 2 [Source:MGI Symbol;Acc:MGI:2180561]                                  | ILMN_2601118 | 33  | 19  | 1.73 |
| Mfsd7a   | major facilitator superfamily domain containing 7A                                                                           | ILMN_2877581 | 109 | 63  | 1.72 |
| Meis1    | Meis homeobox 1 [Source:MGI Symbol;Acc:MGI:104717]                                                                           | ILMN_1218266 | 42  | 24  | 1.72 |
| Atf4     | activating transcription factor 4 [Source:MGI Symbol;Acc:MGI:88096]                                                          | ILMN_2642681 | 201 | 117 | 1.72 |
| Ldah     | lipid droplet associated hydrolase [Source:MGI Symbol;Acc:MGI:1916082]                                                       | ILMN_2756686 | 74  | 43  | 1.72 |
| Rbm10    | RNA binding motif protein 10 [Source:MGI Symbol;Acc:MGI:2384310]                                                             | ILMN_1242598 | 58  | 34  | 1.72 |
| Cxcl12   | chemokine (C-X-C motif) ligand 12 [Source:MGI Symbol;Acc:MGI:103556]                                                         | ILMN_2737302 | 78  | 46  | 1.71 |
| Mtap     | methylthioadenosine phosphorylase [Source:MGI Symbol;Acc:MGI:1914152]                                                        | ILMN_2742867 | 30  | 18  | 1.71 |
| Ppp4r1   | protein phosphatase 4, regulatory subunit 1 [Source:MGI Symbol;Acc:MGI:1917601]                                              | ILMN_2659108 | 30  | 17  | 1.71 |
| Eif5     | eukaryotic translation initiation factor 5                                                                                   | ILMN_1240466 | 49  | 29  | 1.71 |

|          |                                                                                                               |              |     |     |      |
|----------|---------------------------------------------------------------------------------------------------------------|--------------|-----|-----|------|
| Arfgap2  | ADP-ribosylation factor GTPase activating protein 2                                                           | ILMN_2853409 | 37  | 21  | 1.71 |
| Nme3     | NME/NM23 nucleoside diphosphate kinase 3                                                                      | ILMN_2744414 | 47  | 27  | 1.71 |
| Atp2b3   | ATPase, Ca <sup>++</sup> transporting, plasma membrane 3 [Source:MGI Symbol;Acc:MGI:1347353]                  | ILMN_2677687 | 33  | 19  | 1.71 |
| Luzp1    | leucine zipper protein 1 [Source:MGI Symbol;Acc:MGI:107629]                                                   | ILMN_2942276 | 150 | 88  | 1.71 |
| Luzp2    | leucine zipper protein 2 [Source:MGI Symbol;Acc:MGI:1889615]                                                  | ILMN_1256309 | 405 | 237 | 1.71 |
| Atl3     | atlastin GTPase 3 [Source:MGI Symbol;Acc:MGI:1924270]                                                         | ILMN_1241909 | 35  | 21  | 1.70 |
| Tpm2     | tropomyosin 2, beta [Source:MGI Symbol;Acc:MGI:98810]                                                         | ILMN_2487170 | 62  | 36  | 1.70 |
| Slc44a1  | solute carrier family 44, member 1 [Source:MGI Symbol;Acc:MGI:2140592]                                        | ILMN_1254938 | 64  | 38  | 1.70 |
| Agbl5    | ATP/GTP binding protein-like 5 [Source:MGI Symbol;Acc:MGI:2441745]                                            | ILMN_2752600 | 44  | 26  | 1.70 |
| Gtf3c6   | general transcription factor IIIC, polypeptide 6, alpha [Source:MGI Symbol;Acc:MGI:1914621]                   | ILMN_1257110 | 167 | 99  | 1.70 |
| Galk1    | galactokinase 1 [Source:MGI Symbol;Acc:MGI:95730]                                                             | ILMN_2721360 | 120 | 71  | 1.69 |
| Unc45b   | unc-45 myosin chaperone B [Source:MGI Symbol;Acc:MGI:2443377]                                                 | ILMN_3153940 | 26  | 15  | 1.69 |
| Psmb1    | proteasome (prosome, macropain) subunit, beta type 1 [Source:MGI Symbol;Acc:MGI:104884]                       | ILMN_1239724 | 110 | 65  | 1.69 |
| Apoa1    | apolipoprotein A-I [Source:MGI Symbol;Acc:MGI:88049]                                                          | ILMN_2623393 | 39  | 23  | 1.69 |
| Heph     | hephaestin [Source:MGI Symbol;Acc:MGI:1332240]                                                                | ILMN_2726128 | 30  | 18  | 1.69 |
| Anln     | anillin, actin binding protein [Source:MGI Symbol;Acc:MGI:1920174]                                            | ILMN_2595597 | 25  | 15  | 1.68 |
| Tbca     | tubulin cofactor A [Source:MGI Symbol;Acc:MGI:107549]                                                         | ILMN_2747103 | 281 | 167 | 1.68 |
| Med12    | mediator complex subunit 12                                                                                   | ILMN_2468617 | 48  | 28  | 1.68 |
| Ptpre    | protein tyrosine phosphatase, receptor type, E [Source:MGI Symbol;Acc:MGI:97813]                              | ILMN_2826916 | 52  | 31  | 1.68 |
| Phf24    | PHD finger protein 24 [Source:MGI Symbol;Acc:MGI:2140712]                                                     | ILMN_1251756 | 99  | 59  | 1.68 |
| Cabyr    | calcium-binding tyrosine-(Y)-phosphorylation regulated (fibrousheathin 2) [Source:MGI Symbol;Acc:MGI:1918382] | ILMN_3157530 | 86  | 51  | 1.68 |
| Pi4ka    | phosphatidylinositol 4-kinase alpha [Source:MGI Symbol;Acc:MGI:2448506]                                       | ILMN_2998870 | 73  | 44  | 1.68 |
| Sept9    | septin 9 [Source:MGI Symbol;Acc:MGI:1858222]                                                                  | ILMN_2602185 | 40  | 24  | 1.68 |
| Mrgprf   | MAS-related GPR, member F [Source:MGI Symbol;Acc:MGI:2384823]                                                 | ILMN_2760254 | 31  | 19  | 1.68 |
| Stk36    | serine/threonine kinase 36 [Source:MGI Symbol;Acc:MGI:1920831]                                                | ILMN_2989871 | 36  | 21  | 1.67 |
| Trnp1    | TMF1-regulated nuclear protein 1 [Source:MGI Symbol;Acc:MGI:1916789]                                          | ILMN_1253600 | 43  | 26  | 1.67 |
| AU019823 | expressed sequence AU019823 [Source:MGI Symbol;Acc:MGI:2143205]                                               | ILMN_2875915 | 24  | 14  | 1.67 |
| Emcn     | endomucin [Source:MGI Symbol;Acc:MGI:1891716]                                                                 | ILMN_1259365 | 29  | 17  | 1.67 |
| Ccng1    | cyclin G1 [Source:MGI Symbol;Acc:MGI:102890]                                                                  | ILMN_2710229 | 102 | 61  | 1.67 |
| Eif3j1   | eukaryotic translation initiation factor 3, subunit J1 [Source:MGI Symbol;Acc:MGI:1925905]                    | ILMN_2832228 | 64  | 38  | 1.67 |

|         |                                                                                                              |              |     |     |      |
|---------|--------------------------------------------------------------------------------------------------------------|--------------|-----|-----|------|
| Rpp30   | ribonuclease P/MRP 30 subunit [Source:MGI Symbol;Acc:MGI:1859683]                                            | ILMN_1232428 | 48  | 29  | 1.67 |
| Naa35   | N(alpha)-acetyltransferase 35, NatC auxiliary subunit [Source:MGI Symbol;Acc:MGI:1925939]                    | ILMN_2828599 | 53  | 32  | 1.67 |
| Nfatc2  | nuclear factor of activated T cells, cytoplasmic, calcineurin dependent 2 [Source:MGI Symbol;Acc:MGI:102463] | ILMN_2761672 | 27  | 16  | 1.67 |
| Pitpnm2 | phosphatidylinositol transfer protein, membrane-associated 2 [Source:MGI Symbol;Acc:MGI:1336192]             | ILMN_2747507 | 61  | 37  | 1.67 |
| Gab2    | growth factor receptor bound protein 2-associated protein 2 [Source:MGI Symbol;Acc:MGI:1333854]              | ILMN_2833573 | 61  | 37  | 1.67 |
| Spaca9  | sperm acrosome associated 9 [Source:MGI Symbol;Acc:MGI:1917237]                                              | ILMN_2720572 | 31  | 18  | 1.66 |
| Ppp2r5e | protein phosphatase 2, regulatory subunit B', epsilon                                                        | ILMN_1217444 | 104 | 62  | 1.66 |
| Acbd4   | acyl-Coenzyme A binding domain containing 4 [Source:MGI Symbol;Acc:MGI:1914381]                              | ILMN_2689540 | 63  | 38  | 1.66 |
| Rnf4    | ring finger protein 4 [Source:MGI Symbol;Acc:MGI:1201691]                                                    | ILMN_1259754 | 59  | 36  | 1.66 |
| Heph    | hephaestin [Source:MGI Symbol;Acc:MGI:1332240]                                                               | ILMN_2734252 | 34  | 20  | 1.66 |
| Abhd6   | abhydrolase domain containing 6 [Source:MGI Symbol;Acc:MGI:1913332]                                          | ILMN_2853619 | 36  | 22  | 1.66 |
| Sh3rf1  | SH3 domain containing ring finger 1 [Source:MGI Symbol;Acc:MGI:1913066]                                      | ILMN_2602597 | 205 | 124 | 1.66 |
| Ube2g1  | ubiquitin-conjugating enzyme E2G 1 [Source:MGI Symbol;Acc:MGI:1914378]                                       | ILMN_2482026 | 48  | 29  | 1.66 |
| Kbtbd7  | kelch repeat and BTB (POZ) domain containing 7 [Source:MGI Symbol;Acc:MGI:2685141]                           | ILMN_3077630 | 54  | 33  | 1.65 |
| Rnf225  | ring finger protein 225                                                                                      | ILMN_2946672 | 26  | 16  | 1.65 |
| Hs6st1  | heparan sulfate 6-O-sulfotransferase 1 [Source:MGI Symbol;Acc:MGI:1354958]                                   | ILMN_3158500 | 49  | 30  | 1.65 |
| Rab34   | RAB34, member RAS oncogene family [Source:MGI Symbol;Acc:MGI:104606]                                         | ILMN_3029294 | 31  | 19  | 1.64 |
| Dhrs7b  | dehydrogenase/reductase (SDR family) member 7B [Source:MGI Symbol;Acc:MGI:2384931]                           | ILMN_1255146 | 22  | 13  | 1.64 |
| Ddah2   | dimethylarginine dimethylaminohydrolase 2 [Source:MGI Symbol;Acc:MGI:1859016]                                | ILMN_2770183 | 52  | 32  | 1.64 |
| Ankef1  | ankyrin repeat and EF-hand domain containing 1 [Source:MGI Symbol;Acc:MGI:2441685]                           | ILMN_1229153 | 24  | 15  | 1.64 |
| Gnl2    | guanine nucleotide binding protein-like 2 (nucleolar) [Source:MGI Symbol;Acc:MGI:2385207]                    | ILMN_2798753 | 78  | 48  | 1.64 |
| Cnnm1   | cyclin M1 [Source:MGI Symbol;Acc:MGI:1891366]                                                                | ILMN_3001341 | 35  | 21  | 1.64 |
| Ints13  | integrator complex subunit 13 [Source:MGI Symbol;Acc:MGI:1918427]                                            | ILMN_2833356 | 64  | 39  | 1.64 |
| Inpp5e  | inositol polyphosphate-5-phosphatase E [Source:MGI Symbol;Acc:MGI:1927753]                                   | ILMN_2820213 | 48  | 30  | 1.64 |
| Trmt6   | tRNA methyltransferase 6 [Source:MGI Symbol;Acc:MGI:1914176]                                                 | ILMN_2694597 | 53  | 32  | 1.64 |
| Abca9   | ATP-binding cassette, sub-family A (ABC1), member 9 [Source:MGI Symbol;Acc:MGI:2386796]                      | ILMN_2699880 | 28  | 17  | 1.64 |



|               |                                                                                                                        |              |     |     |      |
|---------------|------------------------------------------------------------------------------------------------------------------------|--------------|-----|-----|------|
| Psmid14       | proteasome (prosome, macropain) 26S subunit, non-ATPase, 14 [Source:MGI Symbol;Acc:MGI:1913284]                        | ILMN_2933914 | 77  | 47  | 1.63 |
| Abca9         | ATP-binding cassette, sub-family A (ABC1), member 9 [Source:MGI Symbol;Acc:MGI:2386796]                                | ILMN_2699881 | 30  | 19  | 1.63 |
| Ablim3        | actin binding LIM protein family, member 3 [Source:MGI Symbol;Acc:MGI:2442582]                                         | ILMN_1233130 | 70  | 43  | 1.63 |
| Ctsh          | cathepsin H [Source:MGI Symbol;Acc:MGI:107285]                                                                         | ILMN_2872058 | 40  | 25  | 1.63 |
| Mtg1          | Mus musculus mitochondrial GTPase 1 homolog (S. cerevisiae) (Mtg1), nuclear gene encoding mitochondrial protein, mRNA. | ILMN_3007236 | 22  | 13  | 1.63 |
| Hdhd5         | haloacid dehalogenase like hydrolase domain containing 5 [Source:MGI Symbol;Acc:MGI:2136976]                           | ILMN_1257102 | 32  | 20  | 1.63 |
| Rcan2         | regulator of calcineurin 2 [Source:MGI Symbol;Acc:MGI:1858219]                                                         | ILMN_3106592 | 230 | 141 | 1.63 |
| Ddr1          | discoidin domain receptor family, member 1 [Source:MGI Symbol;Acc:MGI:99216]                                           | ILMN_2713898 | 55  | 34  | 1.63 |
| Sp9           | trans-acting transcription factor 9 [Source:MGI Symbol;Acc:MGI:3574660]                                                | ILMN_3029538 | 52  | 32  | 1.62 |
| Snx9          | sorting nexin 9 [Source:MGI Symbol;Acc:MGI:1913866]                                                                    | ILMN_1231181 | 23  | 14  | 1.62 |
| Slc45a4       | solute carrier family 45, member 4 [Source:MGI Symbol;Acc:MGI:2146236]                                                 | ILMN_2886162 | 84  | 52  | 1.62 |
| Zhx1          | Mus musculus zinc fingers and homeoboxes 1 (Zhx1), transcript variant 1, mRNA.                                         | ILMN_2510714 | 145 | 89  | 1.62 |
| Mcam          | melanoma cell adhesion molecule [Source:MGI Symbol;Acc:MGI:1933966]                                                    | ILMN_2955919 | 39  | 24  | 1.62 |
| Yeats2        | YEATS domain containing 2 [Source:MGI Symbol;Acc:MGI:2447762]                                                          | ILMN_2942588 | 30  | 19  | 1.62 |
| Cep97         | centrosomal protein 97 [Source:MGI Symbol;Acc:MGI:1921451]                                                             | ILMN_2750904 | 35  | 22  | 1.62 |
| Atp11a        | ATPase, class VI, type 11A [Source:MGI Symbol;Acc:MGI:1354735]                                                         | ILMN_2634591 | 29  | 18  | 1.61 |
| Tmem128       | transmembrane protein 128 [Source:MGI Symbol;Acc:MGI:1913559]                                                          | ILMN_2674032 | 28  | 18  | 1.61 |
| 9030025P20Rik | Mus musculus RIKEN cDNA 9030025P20 gene (9030025P20Rik), transcript variant 2, mRNA.                                   | ILMN_3060788 | 26  | 16  | 1.61 |
| Depdc5        | DEP domain containing 5 [Source:MGI Symbol;Acc:MGI:2141101]                                                            | ILMN_1235098 | 26  | 16  | 1.61 |
| Lypd6b        | LY6/PLAUR domain containing 6B [Source:MGI Symbol;Acc:MGI:1919147]                                                     | ILMN_2596998 | 33  | 20  | 1.61 |
| Atp5j         | ATP synthase, H+ transporting, mitochondrial F0 complex, subunit F [Source:MGI Symbol;Acc:MGI:107777]                  | ILMN_2876629 | 107 | 67  | 1.60 |
| Drg1          | developmentally regulated GTP binding protein 1 [Source:MGI Symbol;Acc:MGI:1343297]                                    | ILMN_1238919 | 67  | 42  | 1.60 |
| Rpl21         | Mus musculus ribosomal protein L21 (Rpl21), mRNA.                                                                      | ILMN_1222250 | 25  | 16  | 1.60 |
| Zfp385a       | zinc finger protein 385A [Source:MGI Symbol;Acc:MGI:1352495]                                                           | ILMN_2462783 | 27  | 17  | 1.60 |
| Lrrfip1       | leucine rich repeat (in FLII) interacting protein 1 [Source:MGI Symbol;Acc:MGI:1342770]                                | ILMN_2647720 | 29  | 18  | 1.60 |
| Pmm1          | phosphomannomutase 1 [Source:MGI Symbol;Acc:MGI:1353418]                                                               | ILMN_2974041 | 32  | 20  | 1.60 |
| Slc7a8        | solute carrier family 7 (cationic amino acid transporter, y+ system), member 8 [Source:MGI Symbol;Acc:MGI:1355323]     | ILMN_2780392 | 34  | 21  | 1.60 |

|          |                                                                                                          |              |     |     |      |
|----------|----------------------------------------------------------------------------------------------------------|--------------|-----|-----|------|
| Hspb8    | heat shock protein 8 [Source:MGI Symbol;Acc:MGI:2135756]                                                 | ILMN_2944366 | 25  | 16  | 1.60 |
| Cops8    | COP9 signalosome subunit 8 [Source:MGI Symbol;Acc:MGI:1915363]                                           | ILMN_1218868 | 26  | 16  | 1.59 |
| Snx14    | sorting nexin 14 [Source:MGI Symbol;Acc:MGI:2155664]                                                     | ILMN_1236312 | 37  | 23  | 1.59 |
| Abr      | active BCR-related gene [Source:MGI Symbol;Acc:MGI:107771]                                               | ILMN_2605311 | 63  | 40  | 1.59 |
| Tpm1     | tropomyosin 1, alpha [Source:MGI Symbol;Acc:MGI:98809]                                                   | ILMN_3007072 | 235 | 148 | 1.59 |
| Pcolce2  | procollagen C-endopeptidase enhancer 2 [Source:MGI Symbol;Acc:MGI:1923727]                               | ILMN_1238603 | 67  | 42  | 1.58 |
| Nkap     | NFKB activating protein [Source:MGI Symbol;Acc:MGI:1914300]                                              | ILMN_2854659 | 69  | 44  | 1.58 |
| Thns11   | threonine synthase-like 1 (bacterial) [Source:MGI Symbol;Acc:MGI:2139347]                                | ILMN_3130652 | 22  | 14  | 1.58 |
| Rbp4     | retinol binding protein 4, plasma [Source:MGI Symbol;Acc:MGI:97879]                                      | ILMN_1252185 | 62  | 39  | 1.58 |
| Acot11   | acyl-CoA thioesterase 11 [Source:MGI Symbol;Acc:MGI:1913736]                                             | ILMN_2733465 | 29  | 19  | 1.58 |
| Tmem216  | transmembrane protein 216 [Source:MGI Symbol;Acc:MGI:1920020]                                            | ILMN_2799217 | 40  | 26  | 1.57 |
| Slc25a44 | solute carrier family 25, member 44 [Source:MGI Symbol;Acc:MGI:2444391]                                  | ILMN_2734283 | 150 | 95  | 1.57 |
| Prag1    | PEAK1 related kinase activating pseudokinase 1 [Source:MGI Symbol;Acc:MGI:1196223]                       | ILMN_2731237 | 58  | 37  | 1.57 |
| Kcnh5    | potassium voltage-gated channel, subfamily H (eag-related), member 5 [Source:MGI Symbol;Acc:MGI:3584508] | ILMN_1219743 | 24  | 16  | 1.57 |
| Npm1     | nucleophosmin 1 [Source:MGI Symbol;Acc:MGI:106184]                                                       | ILMN_2970473 | 319 | 203 | 1.57 |
| Pcdh8    | protocadherin 8 [Source:MGI Symbol;Acc:MGI:1306800]                                                      | ILMN_1256415 | 133 | 85  | 1.57 |
| Sgp11    | sphingosine phosphate lyase 1 [Source:MGI Symbol;Acc:MGI:1261415]                                        | ILMN_2936380 | 122 | 78  | 1.57 |
| Stk38l   | serine/threonine kinase 38 like [Source:MGI Symbol;Acc:MGI:1922250]                                      | ILMN_2794051 | 206 | 132 | 1.57 |
| Manba    | mannosidase, beta A, lysosomal [Source:MGI Symbol;Acc:MGI:88175]                                         | ILMN_2835723 | 79  | 51  | 1.56 |
| Tmco3    | transmembrane and coiled-coil domains 3 [Source:MGI Symbol;Acc:MGI:2444946]                              | ILMN_2628744 | 24  | 15  | 1.56 |
| Mprp     | myosin phosphatase Rho interacting protein [Source:MGI Symbol;Acc:MGI:1349438]                           | ILMN_1254067 | 48  | 31  | 1.56 |
| Bicd2    | bicaudal D homolog 2 (Drosophila) [Source:MGI Symbol;Acc:MGI:1924145]                                    | ILMN_3119245 | 39  | 25  | 1.56 |
| Plcb3    | phospholipase C, beta 3 [Source:MGI Symbol;Acc:MGI:104778]                                               | ILMN_2637953 | 49  | 31  | 1.56 |
| Celf4    | CUGBP, Elav-like family member 4 [Source:MGI Symbol;Acc:MGI:1932407]                                     | ILMN_1243635 | 116 | 74  | 1.56 |
| Gpr37    | G protein-coupled receptor 37 [Source:MGI Symbol;Acc:MGI:1313297]                                        | ILMN_1213371 | 53  | 34  | 1.56 |
| Hipk2    | homeodomain interacting protein kinase 2 [Source:MGI Symbol;Acc:MGI:1314872]                             | ILMN_2705324 | 99  | 63  | 1.56 |
| Armxc3   | armadillo repeat containing, X-linked 3 [Source:MGI Symbol;Acc:MGI:1918953]                              | ILMN_1234742 | 64  | 41  | 1.56 |
| Evc      | EvC ciliary complex subunit 1 [Source:MGI Symbol;Acc:MGI:1890596]                                        | ILMN_2706562 | 26  | 17  | 1.55 |
| Scarb2   | scavenger receptor class B, member 2 [Source:MGI Symbol;Acc:MGI:1196458]                                 | ILMN_2907331 | 162 | 104 | 1.55 |

|          |                                                                                                                |              |     |    |      |
|----------|----------------------------------------------------------------------------------------------------------------|--------------|-----|----|------|
| Rhoj     | ras homolog family member J [Source:MGI Symbol;Acc:MGI:1931551]                                                | ILMN_2653567 | 70  | 45 | 1.55 |
| Cdc42se2 | CDC42 small effector 2 [Source:MGI Symbol;Acc:MGI:1919979]                                                     | ILMN_1257761 | 26  | 17 | 1.55 |
| Rb1      | RB transcriptional corepressor 1 [Source:MGI Symbol;Acc:MGI:97874]                                             | ILMN_2679619 | 43  | 28 | 1.55 |
| H2-M10.1 | histocompatibility 2, M region locus 10.1 [Source:MGI Symbol;Acc:MGI:1276522]                                  | ILMN_2730154 | 38  | 25 | 1.55 |
| Spag5    | sperm associated antigen 5 [Source:MGI Symbol;Acc:MGI:1927470]                                                 | ILMN_2744217 | 35  | 23 | 1.55 |
| Slc35e1  | solute carrier family 35, member E1 [Source:MGI Symbol;Acc:MGI:2142403]                                        | ILMN_2752618 | 48  | 31 | 1.55 |
| Luc7l2   | LUC7-like 2 (S. cerevisiae) [Source:MGI Symbol;Acc:MGI:2183260]                                                | ILMN_2765407 | 143 | 92 | 1.55 |
| Clasrp   | CLK4-associating serine/arginine rich protein [Source:MGI Symbol;Acc:MGI:1855695]                              | ILMN_1249654 | 132 | 85 | 1.55 |
| Nelfe    | negative elongation factor complex member E, Rdbp [Source:MGI Symbol;Acc:MGI:102744]                           | ILMN_1233513 | 29  | 19 | 1.54 |
| Kdm3a    | lysine (K)-specific demethylase 3A [Source:MGI Symbol;Acc:MGI:98847]                                           | ILMN_2707895 | 33  | 22 | 1.54 |
| Plekhl1  | pleckstrin homology domain containing, family M (with RUN domain) member 1 [Source:MGI Symbol;Acc:MGI:2443207] | ILMN_2737959 | 59  | 39 | 1.54 |
| Rpf1     | ribosome production factor 1 homolog [Source:MGI Symbol;Acc:MGI:1917535]                                       | ILMN_2639271 | 101 | 66 | 1.54 |
| Ap2s1    | adaptor-related protein complex 2, sigma 1 subunit [Source:MGI Symbol;Acc:MGI:2141861]                         | ILMN_1212941 | 32  | 21 | 1.54 |
| Atl3     | atlastin GTPase 3 [Source:MGI Symbol;Acc:MGI:1924270]                                                          | ILMN_2936468 | 51  | 33 | 1.54 |
| Atp2b2   | ATPase, Ca <sup>++</sup> transporting, plasma membrane 2 [Source:MGI Symbol;Acc:MGI:105368]                    | ILMN_2688213 | 142 | 92 | 1.53 |
| P2rx7    | purinergic receptor P2X, ligand-gated ion channel, 7 [Source:MGI Symbol;Acc:MGI:1339957]                       | ILMN_2620381 | 27  | 17 | 1.53 |
| Rpl27a   | ribosomal protein L27A                                                                                         | ILMN_2882059 | 32  | 21 | 1.53 |
| Rabggtb  | Rab geranylgeranyl transferase, b subunit                                                                      | ILMN_2589819 | 73  | 48 | 1.53 |
| Esyt1    | extended synaptotagmin-like protein 1                                                                          | ILMN_1240994 | 49  | 32 | 1.53 |
| Dctn5    | dynactin 5 [Source:MGI Symbol;Acc:MGI:1891689]                                                                 | ILMN_2732536 | 67  | 43 | 1.53 |
| Tmem218  | transmembrane protein 218 [Source:MGI Symbol;Acc:MGI:1913529]                                                  | ILMN_2981896 | 47  | 31 | 1.53 |
| Nop2     | NOP2 nucleolar protein [Source:MGI Symbol;Acc:MGI:107891]                                                      | ILMN_2688378 | 25  | 16 | 1.53 |
| Slc31a1  | solute carrier family 31, member 1 [Source:MGI Symbol;Acc:MGI:1333843]                                         | ILMN_1254437 | 30  | 20 | 1.53 |
| Serinc3  | serine incorporator 3 [Source:MGI Symbol;Acc:MGI:1349457]                                                      | ILMN_2787844 | 95  | 62 | 1.53 |
| Eif2b2   | eukaryotic translation initiation factor 2B, subunit 2 beta [Source:MGI Symbol;Acc:MGI:2145118]                | ILMN_2762301 | 28  | 18 | 1.53 |
| Ppp1ca   | Mus musculus protein phosphatase 1, catalytic subunit, alpha isoform (Ppp1ca), mRNA.                           | ILMN_1246058 | 31  | 20 | 1.53 |
| Rab4a    | RAB4A, member RAS oncogene family [Source:MGI Symbol;Acc:MGI:105069]                                           | ILMN_1212902 | 61  | 40 | 1.53 |

|         |                                                                                                                             |              |     |     |      |
|---------|-----------------------------------------------------------------------------------------------------------------------------|--------------|-----|-----|------|
| Slc35c2 | solute carrier family 35, member C2 [Source:MGI Symbol;Acc:MGI:2385166]                                                     | ILMN_2729374 | 61  | 40  | 1.53 |
| Hdac10  | histone deacetylase 10 [Source:MGI Symbol;Acc:MGI:2158340]                                                                  | ILMN_2731340 | 41  | 27  | 1.52 |
| Sept6   | septin 6 [Source:MGI Symbol;Acc:MGI:1888939]                                                                                | ILMN_2663914 | 28  | 19  | 1.52 |
| Ift81   | intraflagellar transport 81 [Source:MGI Symbol;Acc:MGI:1098597]                                                             | ILMN_2634702 | 49  | 32  | 1.52 |
| Xab2    | XPA binding protein 2 [Source:MGI Symbol;Acc:MGI:1914689]                                                                   | ILMN_2430673 | 22  | 15  | 1.52 |
| Lsm3    | LSM3 homolog, U6 small nuclear RNA and mRNA degradation associated                                                          | ILMN_2837865 | 91  | 60  | 1.51 |
| Slc7a5  | solute carrier family 7 (cationic amino acid transporter, y+ system), member 5 [Source:MGI Symbol;Acc:MGI:1298205]          | ILMN_2711948 | 83  | 55  | 1.51 |
| Sowaha  | sosondawah ankyrin repeat domain family member A [Source:MGI Symbol;Acc:MGI:2687280]                                        | ILMN_2626556 | 93  | 61  | 1.51 |
| Epn2    | epsin 2 [Source:MGI Symbol;Acc:MGI:1333766]                                                                                 | ILMN_1239027 | 50  | 33  | 1.51 |
| Mrpl18  | mitochondrial ribosomal protein L18 [Source:MGI Symbol;Acc:MGI:1914931]                                                     | ILMN_2823250 | 144 | 95  | 1.51 |
| Ndufa1  | NADH dehydrogenase (ubiquinone) 1 alpha subcomplex, 1 [Source:MGI Symbol;Acc:MGI:1929511]                                   | ILMN_1251370 | 141 | 93  | 1.51 |
| Pithd1  | PITH (C-terminal proteasome-interacting domain of thioredoxin-like) domain containing 1 [Source:MGI Symbol;Acc:MGI:1913443] | ILMN_1221838 | 33  | 22  | 1.51 |
| Elavl2  | ELAV (embryonic lethal, abnormal vision, Drosophila)-like 2 (Hu antigen B) [Source:MGI Symbol;Acc:MGI:1100887]              | ILMN_3121717 | 67  | 44  | 1.51 |
| Plxdc2  | plexin domain containing 2 [Source:MGI Symbol;Acc:MGI:1914698]                                                              | ILMN_2704306 | 28  | 18  | 1.51 |
| Zfp760  | zinc finger protein 760 [Source:MGI Symbol;Acc:MGI:2679257]                                                                 | ILMN_1253678 | 56  | 37  | 1.50 |
| Uts2    | urotensin 2 [Source:MGI Symbol;Acc:MGI:1346329]                                                                             | ILMN_1225001 | 26  | 17  | 1.50 |
| Prdm16  | PR domain containing 16 [Source:MGI Symbol;Acc:MGI:1917923]                                                                 | ILMN_2663314 | 34  | 23  | 1.50 |
| Tfip11  | tuftelin interacting protein 11 [Source:MGI Symbol;Acc:MGI:1930075]                                                         | ILMN_2961179 | 39  | 26  | 1.50 |
| Daam1   | dishevelled associated activator of morphogenesis 1 [Source:MGI Symbol;Acc:MGI:1914596]                                     | ILMN_3031523 | 33  | 22  | 1.50 |
| Psmb4   | proteasome (prosome, macropain) subunit, beta type 4 [Source:MGI Symbol;Acc:MGI:1098257]                                    | ILMN_2671124 | 205 | 137 | 1.50 |
| Rabep1  | rabaptin, RAB GTPase binding effector protein 1 [Source:MGI Symbol;Acc:MGI:1860236]                                         | ILMN_2999748 | 37  | 25  | 1.49 |
| Asphd1  | aspartate beta-hydroxylase domain containing 1 [Source:MGI Symbol;Acc:MGI:2685014]                                          | ILMN_1260082 | 66  | 44  | 1.49 |
| Atl3    | atlastin GTPase 3 [Source:MGI Symbol;Acc:MGI:1924270]                                                                       | ILMN_2635606 | 31  | 21  | 1.49 |
| Il16    | interleukin 16 [Source:MGI Symbol;Acc:MGI:1270855]                                                                          | ILMN_2671738 | 30  | 20  | 1.49 |
| Eva1a   | eva-1 homolog A (C. elegans) [Source:MGI Symbol;Acc:MGI:2385247]                                                            | ILMN_2813577 | 21  | 14  | 1.49 |
| Lsm8    | LSM8 homolog, U6 small nuclear RNA associated [Source:MGI Symbol;Acc:MGI:1923772]                                           | ILMN_2883907 | 43  | 29  | 1.49 |
| Gpr45   | G protein-coupled receptor 45 [Source:MGI Symbol;Acc:MGI:2135882]                                                           | ILMN_1228145 | 48  | 32  | 1.49 |
| Scp2    | sterol carrier protein 2, liver [Source:MGI Symbol;Acc:MGI:98254]                                                           | ILMN_2705886 | 74  | 50  | 1.49 |

|          |                                                                                                     |              |     |     |      |
|----------|-----------------------------------------------------------------------------------------------------|--------------|-----|-----|------|
| Abhd2    | abhydrolase domain containing 2 [Source:MGI Symbol;Acc:MGI:1914344]                                 | ILMN_2877443 | 42  | 28  | 1.49 |
| Spsb4    | splA/ryanodine receptor domain and SOCS box containing 4 [Source:MGI Symbol;Acc:MGI:2183445]        | ILMN_1243507 | 39  | 26  | 1.49 |
| Mtch1    | mitochondrial carrier 1 [Source:MGI Symbol;Acc:MGI:1929261]                                         | ILMN_2708297 | 57  | 38  | 1.49 |
| Clec3b   | C-type lectin domain family 3, member b [Source:MGI Symbol;Acc:MGI:104540]                          | ILMN_2845778 | 71  | 48  | 1.49 |
| Rrm2b    | ribonucleotide reductase M2 B (TP53 inducible) [Source:MGI Symbol;Acc:MGI:2155865]                  | ILMN_2610847 | 31  | 21  | 1.49 |
| Slc35a2  | solute carrier family 35 (UDP-galactose transporter), member A2 [Source:MGI Symbol;Acc:MGI:1345297] | ILMN_2970345 | 38  | 26  | 1.48 |
| Cops4    | COP9 signalosome subunit 4 [Source:MGI Symbol;Acc:MGI:1349414]                                      | ILMN_1215493 | 136 | 92  | 1.48 |
| Bola2    | bolA-like 2 (E. coli) [Source:MGI Symbol;Acc:MGI:1913412]                                           | ILMN_2846368 | 129 | 87  | 1.48 |
| Pde4dip  | phosphodiesterase 4D interacting protein (myomegalin) [Source:MGI Symbol;Acc:MGI:1891434]           | ILMN_1215884 | 180 | 122 | 1.48 |
| Btf3     | basic transcription factor 3 [Source:MGI Symbol;Acc:MGI:1202875]                                    | ILMN_2720034 | 58  | 40  | 1.48 |
| Rpf2     | ribosome production factor 2 homolog [Source:MGI Symbol;Acc:MGI:1914489]                            | ILMN_1226709 | 95  | 65  | 1.47 |
| Cfb      | complement factor B                                                                                 | ILMN_1230853 | 26  | 18  | 1.47 |
| Sdsl     | serine dehydratase-like [Source:MGI Symbol;Acc:MGI:2182607]                                         | ILMN_1231627 | 23  | 16  | 1.47 |
| Lrrn1    | leucine rich repeat protein 1, neuronal [Source:MGI Symbol;Acc:MGI:106038]                          | ILMN_2759736 | 90  | 61  | 1.47 |
| Ssb      | Sjogren syndrome antigen B [Source:MGI Symbol;Acc:MGI:98423]                                        | ILMN_2729645 | 127 | 87  | 1.47 |
| Ivns1abp | influenza virus NS1A binding protein [Source:MGI Symbol;Acc:MGI:2152389]                            | ILMN_3084087 | 64  | 44  | 1.47 |
| Prmt5    | protein arginine N-methyltransferase 5 [Source:MGI Symbol;Acc:MGI:1351645]                          | ILMN_2720634 | 37  | 25  | 1.46 |
| Pard6a   | par-6 family cell polarity regulator alpha [Source:MGI Symbol;Acc:MGI:1927223]                      | ILMN_3114759 | 61  | 42  | 1.46 |
| Susd6    | sushi domain containing 6 [Source:MGI Symbol;Acc:MGI:2444661]                                       | ILMN_1254551 | 45  | 31  | 1.46 |
| Ift52    | intraflagellar transport 52 [Source:MGI Symbol;Acc:MGI:2387217]                                     | ILMN_2788283 | 49  | 34  | 1.46 |
| Rab31    | RAB31, member RAS oncogene family [Source:MGI Symbol;Acc:MGI:1914603]                               | ILMN_2665008 | 90  | 62  | 1.46 |
| Stag2    | stromal antigen 2 [Source:MGI Symbol;Acc:MGI:1098583]                                               | ILMN_1232962 | 87  | 60  | 1.45 |
| Mtor     | mechanistic target of rapamycin (serine/threonine kinase) [Source:MGI Symbol;Acc:MGI:1928394]       | ILMN_1257068 | 27  | 19  | 1.45 |
| Fbxo25   | F-box protein 25 [Source:MGI Symbol;Acc:MGI:1914072]                                                | ILMN_2762397 | 115 | 79  | 1.45 |
| Pir      | pirin [Source:MGI Symbol;Acc:MGI:1916906]                                                           | ILMN_2640551 | 35  | 24  | 1.45 |
| Ppp1r3c  | protein phosphatase 1, regulatory (inhibitor) subunit 3C [Source:MGI Symbol;Acc:MGI:1858229]        | ILMN_2667091 | 361 | 250 | 1.44 |
| Gpn1     | GPN-loop GTPase 1 [Source:MGI Symbol;Acc:MGI:1921504]                                               | ILMN_2921749 | 30  | 21  | 1.44 |

|               |                                                                                                              |              |     |     |      |
|---------------|--------------------------------------------------------------------------------------------------------------|--------------|-----|-----|------|
| Ptp4a3        | protein tyrosine phosphatase 4a3 [Source:MGI Symbol;Acc:MGI:1277098]                                         | ILMN_2655260 | 24  | 16  | 1.44 |
| Lsm6          | LSM6 homolog, U6 small nuclear RNA and mRNA degradation associated [Source:MGI Symbol;Acc:MGI:1925901]       | ILMN_1251056 | 74  | 51  | 1.44 |
| Ogn           | osteoglycin [Source:MGI Symbol;Acc:MGI:109278]                                                               | ILMN_2859619 | 73  | 51  | 1.44 |
| Fam229b       | family with sequence similarity 229, member B [Source:MGI Symbol;Acc:MGI:1913587]                            | ILMN_1214517 | 65  | 45  | 1.43 |
| Wbp11         | WW domain binding protein 11 [Source:MGI Symbol;Acc:MGI:1891823]                                             | ILMN_1213144 | 48  | 33  | 1.43 |
| Sgip1         | SH3-domain GRB2-like (endophilin) interacting protein 1 [Source:MGI Symbol;Acc:MGI:1920344]                  | ILMN_2678327 | 95  | 67  | 1.43 |
| Sdhaf1        | succinate dehydrogenase complex assembly factor 1 [Source:MGI Symbol;Acc:MGI:1915582]                        | ILMN_2891688 | 47  | 33  | 1.43 |
| 1810009A15Rik | Mus musculus RIKEN cDNA 1810009A15 gene (1810009A15Rik), mRNA.                                               | ILMN_2872246 | 28  | 20  | 1.43 |
| Fbxw8         | F-box and WD-40 domain protein 8 [Source:MGI Symbol;Acc:MGI:1923041]                                         | ILMN_1251236 | 71  | 50  | 1.43 |
| Spin4         | spindlin family, member 4 [Source:MGI Symbol;Acc:MGI:2444925]                                                | ILMN_2755717 | 23  | 16  | 1.43 |
| Ggps1         | geranylgeranyl diphosphate synthase 1 [Source:MGI Symbol;Acc:MGI:1341724]                                    | ILMN_1237585 | 24  | 17  | 1.43 |
| Arid4a        | AT rich interactive domain 4A (RBP1-like) [Source:MGI Symbol;Acc:MGI:2444354]                                | ILMN_3127411 | 85  | 60  | 1.42 |
| Tesk2         | testis-specific kinase 2 [Source:MGI Symbol;Acc:MGI:2385204]                                                 | ILMN_2628330 | 57  | 41  | 1.41 |
| Tmem145       | transmembrane protein 145 [Source:MGI Symbol;Acc:MGI:3607779]                                                | ILMN_1214060 | 123 | 87  | 1.41 |
| Psmc6         | proteasome (prosome, macropain) 26S subunit, ATPase, 6 [Source:MGI Symbol;Acc:MGI:1914339]                   | ILMN_2631558 | 163 | 115 | 1.41 |
| Phpt1         | phosphohistidine phosphatase 1                                                                               | ILMN_2626143 | 96  | 68  | 1.41 |
| Dclk1         | doublecortin-like kinase 1 [Source:MGI Symbol;Acc:MGI:1330861]                                               | ILMN_1217517 | 116 | 82  | 1.41 |
| Sgip1         | SH3-domain GRB2-like (endophilin) interacting protein 1 [Source:MGI Symbol;Acc:MGI:1920344]                  | ILMN_2616841 | 80  | 57  | 1.40 |
| Slc5a6        | solute carrier family 5 (sodium-dependent vitamin transporter), member 6 [Source:MGI Symbol;Acc:MGI:2660847] | ILMN_1225056 | 135 | 97  | 1.40 |
| Cxcl14        | chemokine (C-X-C motif) ligand 14 [Source:MGI Symbol;Acc:MGI:1888514]                                        | ILMN_2659426 | 46  | 33  | 1.40 |
| Dnajc19       | DnaJ heat shock protein family (Hsp40) member C19 [Source:MGI Symbol;Acc:MGI:1914963]                        | ILMN_3103439 | 151 | 107 | 1.40 |
| Rcan2         | regulator of calcineurin 2 [Source:MGI Symbol;Acc:MGI:1858219]                                               | ILMN_1212612 | 251 | 179 | 1.40 |
| Ddx3y         | DEAD (Asp-Glu-Ala-Asp) box polypeptide 3, Y-linked [Source:MGI Symbol;Acc:MGI:1349406]                       | ILMN_2899607 | 29  | 21  | 1.40 |
| Mctp1         | multiple C2 domains, transmembrane 1 [Source:MGI Symbol;Acc:MGI:1926021]                                     | ILMN_2701948 | 35  | 25  | 1.39 |
| Colla2        | collagen, type I, alpha 2 [Source:MGI Symbol;Acc:MGI:88468]                                                  | ILMN_1253806 | 275 | 197 | 1.39 |
| Ssb           | Sjogren syndrome antigen B [Source:MGI Symbol;Acc:MGI:98423]                                                 | ILMN_2591749 | 259 | 186 | 1.39 |
| Tbcb          | tubulin folding cofactor B [Source:MGI Symbol;Acc:MGI:1913661]                                               | ILMN_2620061 | 252 | 181 | 1.39 |

|           |                                                                                                                                                      |              |     |     |       |
|-----------|------------------------------------------------------------------------------------------------------------------------------------------------------|--------------|-----|-----|-------|
| Nfat5     | nuclear factor of activated T cells 5 [Source:MGI Symbol;Acc:MGI:1859333]                                                                            | ILMN_2612448 | 120 | 87  | 1.39  |
| Col16a1   | collagen, type XVI, alpha 1 [Source:MGI Symbol;Acc:MGI:1095396]                                                                                      | ILMN_1248099 | 93  | 67  | 1.38  |
| Glrb      | glycine receptor, beta subunit [Source:MGI Symbol;Acc:MGI:95751]                                                                                     | ILMN_2685831 | 71  | 51  | 1.38  |
| Fen1      | flap structure specific endonuclease 1 [Source:MGI Symbol;Acc:MGI:102779]                                                                            | ILMN_1259473 | 29  | 21  | 1.38  |
| Gcnt1     | glucosaminyl (N-acetyl) transferase 1, core 2 [Source:MGI Symbol;Acc:MGI:95676]                                                                      | ILMN_1256299 | 61  | 44  | 1.38  |
| Tarbp2    | TARBP2, RISC loading complex RNA binding subunit                                                                                                     | ILMN_2939990 | 44  | 32  | 1.37  |
| Grik1     | glutamate receptor, ionotropic, kainate 1 [Source:MGI Symbol;Acc:MGI:95814]                                                                          | ILMN_3145360 | 25  | 18  | 1.37  |
| Tmem98    | transmembrane protein 98 [Source:MGI Symbol;Acc:MGI:1923457]                                                                                         | ILMN_2658815 | 29  | 21  | 1.37  |
| Rae1      | ribonucleic acid export 1 [Source:MGI Symbol;Acc:MGI:1913929]                                                                                        | ILMN_2713130 | 24  | 17  | 1.37  |
| Tmem14c   | transmembrane protein 14C [Source:MGI Symbol;Acc:MGI:1913404]                                                                                        | ILMN_2435206 | 40  | 29  | 1.37  |
| Mfsd11    | major facilitator superfamily domain containing 11 [Source:MGI Symbol;Acc:MGI:1917150]                                                               | ILMN_1216901 | 27  | 20  | 1.36  |
| Evi5      | ecotropic viral integration site 5 [Source:MGI Symbol;Acc:MGI:104736]                                                                                | ILMN_2613546 | 153 | 113 | 1.36  |
| Mboat2    | membrane bound O-acyltransferase domain containing 2 [Source:MGI Symbol;Acc:MGI:1914466]                                                             | ILMN_2782248 | 15  | 20  | -1.36 |
| Lipe      | lipase, hormone sensitive [Source:MGI Symbol;Acc:MGI:96790]                                                                                          | ILMN_3111326 | 16  | 22  | -1.36 |
| Rad51d    | RAD51 paralog D [Source:MGI Symbol;Acc:MGI:1261809]                                                                                                  | ILMN_2700533 | 18  | 24  | -1.37 |
| Rdh7      | retinol dehydrogenase 7 [Source:MGI Symbol;Acc:MGI:1860517]                                                                                          | ILMN_2871249 | 20  | 27  | -1.37 |
| Foxj3     | forkhead box J3 [Source:MGI Symbol;Acc:MGI:2443432]                                                                                                  | ILMN_1218721 | 42  | 58  | -1.38 |
| Ttc39c    | tetratricopeptide repeat domain 39C [Source:MGI Symbol;Acc:MGI:1919997]                                                                              | ILMN_1216182 | 25  | 35  | -1.38 |
| March7    | membrane-associated ring finger (C3HC4) 7 [Source:MGI Symbol;Acc:MGI:1931053]                                                                        | ILMN_2711892 | 58  | 80  | -1.38 |
| Atg3      | autophagy related 3 [Source:MGI Symbol;Acc:MGI:1915091]                                                                                              | ILMN_2595188 | 28  | 38  | -1.38 |
| Sema4g    | sema domain, immunoglobulin domain (Ig), transmembrane domain (TM) and short cytoplasmic domain, (semaphorin) 4G [Source:MGI Symbol;Acc:MGI:1347047] | ILMN_2718314 | 92  | 127 | -1.38 |
| Maob      | monoamine oxidase B [Source:MGI Symbol;Acc:MGI:96916]                                                                                                | ILMN_2719069 | 79  | 110 | -1.38 |
| LOC333331 | PREDICTED: Mus musculus similar to medium-chain acyl-CoA dehydrogenase (LOC333331), misc RNA.                                                        | ILMN_1256019 | 22  | 30  | -1.39 |
| Guca1b    | guanylate cyclase activator 1B [Source:MGI Symbol;Acc:MGI:1194489]                                                                                   | ILMN_2754287 | 23  | 31  | -1.39 |
| Gpr3      | G-protein coupled receptor 3 [Source:MGI Symbol;Acc:MGI:101908]                                                                                      | ILMN_2678530 | 20  | 28  | -1.39 |
| Unk       | unkempt family zinc finger [Source:MGI Symbol;Acc:MGI:2442456]                                                                                       | ILMN_2509928 | 80  | 111 | -1.39 |
| Hipk3     | homeodomain interacting protein kinase 3 [Source:MGI Symbol;Acc:MGI:1314882]                                                                         | ILMN_1253204 | 53  | 74  | -1.39 |
| Nuak1     | NUAK family, SNF1-like kinase, 1 [Source:MGI Symbol;Acc:MGI:1925226]                                                                                 | ILMN_2928720 | 29  | 40  | -1.40 |

|          |                                                                                           |              |     |     |       |
|----------|-------------------------------------------------------------------------------------------|--------------|-----|-----|-------|
| Zfp367   | zinc finger protein 367 [Source:MGI Symbol;Acc:MGI:2442266]                               | ILMN_2897424 | 16  | 23  | -1.40 |
| Snx6     | sorting nexin 6 [Source:MGI Symbol;Acc:MGI:1919433]                                       | ILMN_2896582 | 135 | 189 | -1.40 |
| Tmprss6  | transmembrane serine protease 6 [Source:MGI Symbol;Acc:MGI:1919003]                       | ILMN_2469310 | 16  | 22  | -1.40 |
| Arl5a    | ADP-ribosylation factor-like 5A [Source:MGI Symbol;Acc:MGI:1922673]                       | ILMN_2692986 | 257 | 360 | -1.40 |
| Gsk3b    | glycogen synthase kinase 3 beta [Source:MGI Symbol;Acc:MGI:1861437]                       | ILMN_2593888 | 125 | 176 | -1.40 |
| Lhx3     | LIM homeobox protein 3 [Source:MGI Symbol;Acc:MGI:102673]                                 | ILMN_2784382 | 20  | 29  | -1.41 |
| Prrt1    | proline-rich transmembrane protein 1 [Source:MGI Symbol;Acc:MGI:1932118]                  | ILMN_2751486 | 115 | 161 | -1.41 |
| Ctsw     | cathepsin W [Source:MGI Symbol;Acc:MGI:1338045]                                           | ILMN_2721399 | 16  | 23  | -1.41 |
| Cep85    | centrosomal protein 85 [Source:MGI Symbol;Acc:MGI:1917262]                                | ILMN_2759983 | 22  | 30  | -1.41 |
| Eif1a    | eukaryotic translation initiation factor 1A [Source:MGI Symbol;Acc:MGI:95298]             | ILMN_2698107 | 31  | 44  | -1.41 |
| Scamp3   | secretory carrier membrane protein 3 [Source:MGI Symbol;Acc:MGI:1346346]                  | ILMN_1245139 | 42  | 59  | -1.41 |
| Zfp944   | zinc finger protein 944 [Source:MGI Symbol;Acc:MGI:2442394]                               | ILMN_2645989 | 15  | 21  | -1.41 |
| Ncoa2    | nuclear receptor coactivator 2 [Source:MGI Symbol;Acc:MGI:1276533]                        | ILMN_1259910 | 22  | 31  | -1.41 |
| Asap1    | ArfGAP with SH3 domain, ankyrin repeat and PH domain1 [Source:MGI Symbol;Acc:MGI:1342335] | ILMN_1229593 | 53  | 75  | -1.42 |
| Zdhhc20  | zinc finger, DHHC domain containing 20 [Source:MGI Symbol;Acc:MGI:1923215]                | ILMN_1216728 | 63  | 89  | -1.42 |
| Gpc5     | glypican 5 [Source:MGI Symbol;Acc:MGI:1194894]                                            | ILMN_2719860 | 26  | 36  | -1.42 |
| Lrrc14b  | leucine rich repeat containing 14B [Source:MGI Symbol;Acc:MGI:2145269]                    | ILMN_3161863 | 17  | 24  | -1.42 |
| Arl2     | ADP-ribosylation factor-like 2 [Source:MGI Symbol;Acc:MGI:1928393]                        | ILMN_2620304 | 31  | 44  | -1.42 |
| Hoxc10   | homeobox C10 [Source:MGI Symbol;Acc:MGI:96192]                                            | ILMN_2836885 | 21  | 30  | -1.42 |
| Tulp1    | tubby like protein 1 [Source:MGI Symbol;Acc:MGI:109571]                                   | ILMN_1236774 | 16  | 23  | -1.42 |
| Msn      | moesin [Source:MGI Symbol;Acc:MGI:97167]                                                  | ILMN_2694960 | 24  | 34  | -1.42 |
| Arl5a    | ADP-ribosylation factor-like 5A [Source:MGI Symbol;Acc:MGI:1922673]                       | ILMN_1221102 | 264 | 376 | -1.43 |
| Lysmd2   | LysM, putative peptidoglycan-binding, domain containing 2                                 | ILMN_1239808 | 31  | 45  | -1.43 |
| Rrbp1    | ribosome binding protein 1 [Source:MGI Symbol;Acc:MGI:1932395]                            | ILMN_2597686 | 23  | 32  | -1.43 |
| Srsf10   | serine/arginine-rich splicing factor 10 [Source:MGI Symbol;Acc:MGI:1333805]               | ILMN_3019002 | 55  | 78  | -1.43 |
| Slc35c2  | solute carrier family 35, member C2 [Source:MGI Symbol;Acc:MGI:2385166]                   | ILMN_2895000 | 40  | 57  | -1.43 |
| Zfp709   | zinc finger protein 709 [Source:MGI Symbol;Acc:MGI:2384299]                               | ILMN_1248268 | 49  | 71  | -1.43 |
| Ptp4a2   | protein tyrosine phosphatase 4a2 [Source:MGI Symbol;Acc:MGI:1277117]                      | ILMN_2647282 | 117 | 168 | -1.43 |
| Tmem126a | transmembrane protein 126A [Source:MGI Symbol;Acc:MGI:1913521]                            | ILMN_2803627 | 127 | 183 | -1.44 |
| Fnbp4    | formin binding protein 4 [Source:MGI Symbol;Acc:MGI:1860513]                              | ILMN_1251257 | 15  | 22  | -1.44 |
| Ccdc50   | coiled-coil domain containing 50 [Source:MGI Symbol;Acc:MGI:1914751]                      | ILMN_2737381 | 29  | 42  | -1.44 |
| Olfm2    | olfactomedin 2 [Source:MGI Symbol;Acc:MGI:3045350]                                        | ILMN_2660009 | 25  | 35  | -1.44 |



|          |                                                                                      |              |     |     |       |
|----------|--------------------------------------------------------------------------------------|--------------|-----|-----|-------|
| Vps25    | vacuolar protein sorting 25                                                          | ILMN_3000008 | 99  | 142 | -1.44 |
| Snrpd2   | small nuclear ribonucleoprotein D2 [Source:MGI Symbol;Acc:MGI:98345]                 | ILMN_2612635 | 109 | 157 | -1.44 |
| Hnrnpul1 | heterogeneous nuclear ribonucleoprotein U-like 1 [Source:MGI Symbol;Acc:MGI:2443517] | ILMN_2680490 | 28  | 40  | -1.44 |
| Cdc42se1 | CDC42 small effector 1 [Source:MGI Symbol;Acc:MGI:1889510]                           | ILMN_1259946 | 157 | 226 | -1.44 |
| Tprgl    | transformation related protein 63 regulated like [Source:MGI Symbol;Acc:MGI:1915058] | ILMN_1255745 | 42  | 60  | -1.44 |
| Tmem63c  | transmembrane protein 63c [Source:MGI Symbol;Acc:MGI:2444386]                        | ILMN_1233991 | 25  | 36  | -1.45 |
| Frg1     | FSHD region gene 1 [Source:MGI Symbol;Acc:MGI:893597]                                | ILMN_1240867 | 15  | 22  | -1.45 |
| Klhdc3   | kelch domain containing 3 [Source:MGI Symbol;Acc:MGI:2651568]                        | ILMN_2851023 | 65  | 95  | -1.45 |
| Tns2     | tensin 2 [Source:MGI Symbol;Acc:MGI:2387586]                                         | ILMN_2744164 | 56  | 80  | -1.45 |
| Rab5a    | RAB5A, member RAS oncogene family [Source:MGI Symbol;Acc:MGI:105926]                 | ILMN_2786763 | 70  | 101 | -1.45 |
| Ccl12    | chemokine (C-C motif) ligand 12 [Source:MGI Symbol;Acc:MGI:108224]                   | ILMN_2771766 | 19  | 28  | -1.45 |
| Zfp579   | zinc finger protein 579 [Source:MGI Symbol;Acc:MGI:1915740]                          | ILMN_1222760 | 39  | 57  | -1.45 |
| Bcl2     | B cell leukemia/lymphoma 2 [Source:MGI Symbol;Acc:MGI:88138]                         | ILMN_2682162 | 20  | 29  | -1.45 |
| Wwtr1    | WW domain containing transcription regulator 1 [Source:MGI Symbol;Acc:MGI:1917649]   | ILMN_2732998 | 34  | 50  | -1.45 |
| Mtg2     | mitochondrial ribosome associated GTPase 2 [Source:MGI Symbol;Acc:MGI:106565]        | ILMN_2759167 | 17  | 25  | -1.45 |
| Fam204a  | family with sequence similarity 204, member A [Source:MGI Symbol;Acc:MGI:1289174]    | ILMN_2888572 | 33  | 49  | -1.46 |
| Sdad1    | SDA1 domain containing 1 [Source:MGI Symbol;Acc:MGI:2140779]                         | ILMN_1250278 | 58  | 84  | -1.46 |
| Vps35    | VPS35 retromer complex component [Source:MGI Symbol;Acc:MGI:1890467]                 | ILMN_2844784 | 111 | 161 | -1.46 |
| Mzt1     | mitotic spindle organizing protein 1 [Source:MGI Symbol;Acc:MGI:1924039]             | ILMN_1249032 | 26  | 38  | -1.46 |
| Sphk2    | sphingosine kinase 2 [Source:MGI Symbol;Acc:MGI:1861380]                             | ILMN_2639777 | 18  | 26  | -1.46 |
| Atxn7l1  | ataxin 7-like 1 [Source:MGI Symbol;Acc:MGI:3584458]                                  | ILMN_1246174 | 24  | 35  | -1.46 |
| Clip1    | CAP-GLY domain containing linker protein 1 [Source:MGI Symbol;Acc:MGI:1928401]       | ILMN_1238497 | 100 | 145 | -1.46 |
| Vmn1r69  | vomer nasal 1 receptor 69 [Source:MGI Symbol;Acc:MGI:2182253]                        | ILMN_1233229 | 16  | 23  | -1.46 |
| Pcdhb20  | protocadherin beta 20 [Source:MGI Symbol;Acc:MGI:2136758]                            | ILMN_2979449 | 20  | 29  | -1.46 |
| Sec22a   | SEC22 homolog A, vesicle trafficking protein [Source:MGI Symbol;Acc:MGI:2447876]     | ILMN_2747735 | 26  | 37  | -1.46 |
| Tmed10   | transmembrane p24 trafficking protein 10 [Source:MGI Symbol;Acc:MGI:1915831]         | ILMN_3002943 | 208 | 303 | -1.46 |
| Olf1008  | olfactory receptor 1008 [Source:MGI Symbol;Acc:MGI:3030842]                          | ILMN_2764242 | 16  | 23  | -1.46 |
| Hnrnp2   | heterogeneous nuclear ribonucleoprotein H2 [Source:MGI Symbol;Acc:MGI:1201779]       | ILMN_2680808 | 23  | 34  | -1.46 |

|               |                                                                                                                                  |              |     |     |       |
|---------------|----------------------------------------------------------------------------------------------------------------------------------|--------------|-----|-----|-------|
| Ptp4a2        | protein tyrosine phosphatase 4a2 [Source:MGI Symbol;Acc:MGI:1277117]                                                             | ILMN_1243291 | 98  | 143 | -1.46 |
| Spsb1         | splA/ryanodine receptor domain and SOCS box containing 1 [Source:MGI Symbol;Acc:MGI:1921896]                                     | ILMN_1224336 | 46  | 68  | -1.46 |
| Endov         | endonuclease V [Source:MGI Symbol;Acc:MGI:2444688]                                                                               | ILMN_1238805 | 20  | 29  | -1.47 |
| Myog          | myogenin [Source:MGI Symbol;Acc:MGI:97276]                                                                                       | ILMN_2621812 | 16  | 24  | -1.47 |
| Rps6ka2       | ribosomal protein S6 kinase, polypeptide 2 [Source:MGI Symbol;Acc:MGI:1342290]                                                   | ILMN_2655510 | 160 | 234 | -1.47 |
| Ethe1         | ethylmalonic encephalopathy 1 [Source:MGI Symbol;Acc:MGI:1913321]                                                                | ILMN_2621074 | 41  | 60  | -1.47 |
| Ttc33         | Mus musculus tetratricopeptide repeat domain 33 (Ttc33), mRNA.                                                                   | ILMN_2713039 | 55  | 81  | -1.47 |
| Isca1         | iron-sulfur cluster assembly 1 [Source:MGI Symbol;Acc:MGI:1916296]                                                               | ILMN_2888842 | 162 | 238 | -1.47 |
| Fam78b        | family with sequence similarity 78, member B [Source:MGI Symbol;Acc:MGI:2443050]                                                 | ILMN_2590605 | 36  | 52  | -1.47 |
| Btbd6         | Mus musculus BTB (POZ) domain containing 6 (Btbd6), mRNA.                                                                        | ILMN_2839682 | 38  | 56  | -1.47 |
| Hsp90ab1      | heat shock protein 90 alpha (cytosolic), class B member 1 [Source:MGI Symbol;Acc:MGI:96247]                                      | ILMN_1233733 | 92  | 136 | -1.47 |
| Bet1l         | Bet1 golgi vesicular membrane trafficking protein like [Source:MGI Symbol;Acc:MGI:1913128]                                       | ILMN_2639819 | 137 | 201 | -1.47 |
| Kank2         | KN motif and ankyrin repeat domains 2 [Source:MGI Symbol;Acc:MGI:2384568]                                                        | ILMN_1240266 | 119 | 176 | -1.47 |
| Ercc6l2       | excision repair cross-complementing rodent repair deficiency, complementation group 6 like 2 [Source:MGI Symbol;Acc:MGI:1923501] | ILMN_2816356 | 15  | 22  | -1.48 |
| Trem1         | triggering receptor expressed on myeloid cells 1 [Source:MGI Symbol;Acc:MGI:1930005]                                             | ILMN_2428545 | 25  | 37  | -1.48 |
| Tmem176a      | transmembrane protein 176A [Source:MGI Symbol;Acc:MGI:1913308]                                                                   | ILMN_2795412 | 143 | 211 | -1.48 |
| Slc31a2       | solute carrier family 31, member 2 [Source:MGI Symbol;Acc:MGI:1333844]                                                           | ILMN_2634656 | 27  | 41  | -1.48 |
| Ndst1         | N-deacetylase/N-sulfotransferase (heparan glucosaminyl) 1 [Source:MGI Symbol;Acc:MGI:104719]                                     | ILMN_2832641 | 175 | 260 | -1.48 |
| Lrrc1         | leucine rich repeat containing 1 [Source:MGI Symbol;Acc:MGI:2442313]                                                             | ILMN_2744478 | 29  | 42  | -1.48 |
| Itih5         | inter-alpha (globulin) inhibitor H5 [Source:MGI Symbol;Acc:MGI:1925751]                                                          | ILMN_1248909 | 28  | 41  | -1.48 |
| Tnfrsf11a     | tumor necrosis factor receptor superfamily, member 11a, NFKB activator [Source:MGI Symbol;Acc:MGI:1314891]                       | ILMN_2482600 | 16  | 24  | -1.48 |
| 1700123O20Rik | RIKEN cDNA 1700123O20 gene [Source:MGI Symbol;Acc:MGI:1920893]                                                                   | ILMN_2999447 | 58  | 86  | -1.48 |
| Ring1         | ring finger protein 1                                                                                                            | ILMN_2932539 | 55  | 82  | -1.49 |
| Sema6b        | sema domain, transmembrane domain (TM), and cytoplasmic domain, (semaphorin) 6B [Source:MGI Symbol;Acc:MGI:1202889]              | ILMN_3158135 | 214 | 319 | -1.49 |
| Fam221a       | family with sequence similarity 221, member A [Source:MGI Symbol;Acc:MGI:2442161]                                                | ILMN_1217670 | 85  | 126 | -1.49 |
| Sned1         | sushi, nidogen and EGF-like domains 1                                                                                            | ILMN_2772334 | 20  | 30  | -1.49 |
| Ranbp17       | RAN binding protein 17 [Source:MGI Symbol;Acc:MGI:1929706]                                                                       | ILMN_2876169 | 16  | 23  | -1.49 |

|               |                                                                                                     |              |     |     |       |
|---------------|-----------------------------------------------------------------------------------------------------|--------------|-----|-----|-------|
| Tnmd          | tenomodulin [Source:MGI Symbol;Acc:MGI:1929885]                                                     | ILMN_1243429 | 16  | 23  | -1.50 |
| Nat8          | N-acetyltransferase 8 (GCN5-related) [Source:MGI Symbol;Acc:MGI:1915646]                            | ILMN_1216539 | 26  | 38  | -1.50 |
| Crmp1         | collapsin response mediator protein 1 [Source:MGI Symbol;Acc:MGI:107793]                            | ILMN_1244675 | 41  | 61  | -1.50 |
| Larp1b        | La ribonucleoprotein domain family, member 1B [Source:MGI Symbol;Acc:MGI:1914604]                   | ILMN_1241785 | 21  | 31  | -1.50 |
| Raver2        | ribonucleoprotein, PTB-binding 2 [Source:MGI Symbol;Acc:MGI:2443623]                                | ILMN_3009400 | 17  | 26  | -1.50 |
| Rbsn          | rabenosyn, RAB effector [Source:MGI Symbol;Acc:MGI:1925537]                                         | ILMN_1234236 | 138 | 207 | -1.50 |
| Ptbp3         | polypyrimidine tract binding protein 3 [Source:MGI Symbol;Acc:MGI:1923334]                          | ILMN_1257327 | 36  | 54  | -1.50 |
| Mmp19         | matrix metalloproteinase 19 [Source:MGI Symbol;Acc:MGI:1927899]                                     | ILMN_2595908 | 15  | 23  | -1.50 |
| H1fx          | H1 histone family, member X [Source:MGI Symbol;Acc:MGI:2685307]                                     | ILMN_1247646 | 47  | 70  | -1.51 |
| Recql         | RecQ protein-like [Source:MGI Symbol;Acc:MGI:103021]                                                | ILMN_1249655 | 16  | 25  | -1.51 |
| Spryd7        | SPRY domain containing 7 [Source:MGI Symbol;Acc:MGI:1913924]                                        | ILMN_2704715 | 232 | 349 | -1.51 |
| Bbx           | bobby sox HMG box containing [Source:MGI Symbol;Acc:MGI:1917758]                                    | ILMN_2669461 | 312 | 469 | -1.51 |
| Igf2r         | insulin-like growth factor 2 receptor [Source:MGI Symbol;Acc:MGI:96435]                             | ILMN_2931096 | 24  | 36  | -1.51 |
| Jmy           | junction-mediating and regulatory protein [Source:MGI Symbol;Acc:MGI:1913096]                       | ILMN_2437714 | 57  | 86  | -1.51 |
| Nxf1          | nuclear RNA export factor 1 [Source:MGI Symbol;Acc:MGI:1858330]                                     | ILMN_2896528 | 115 | 174 | -1.51 |
| A530099J19Rik | RIKEN cDNA A530099J19 gene [Source:MGI Symbol;Acc:MGI:2441809]                                      | ILMN_1221040 | 17  | 25  | -1.51 |
| Akap6         | A kinase (PRKA) anchor protein 6 [Source:MGI Symbol;Acc:MGI:3050566]                                | ILMN_3005211 | 312 | 471 | -1.51 |
| Nedd4         | neural precursor cell expressed, developmentally down-regulated 4 [Source:MGI Symbol;Acc:MGI:97297] | ILMN_2594344 | 188 | 283 | -1.51 |
| Jak2          | Janus kinase 2 [Source:MGI Symbol;Acc:MGI:96629]                                                    | ILMN_1245579 | 17  | 26  | -1.51 |
| Kctd14        | potassium channel tetramerisation domain containing 14 [Source:MGI Symbol;Acc:MGI:1289222]          | ILMN_2533104 | 14  | 21  | -1.51 |
| Ncoa4         | nuclear receptor coactivator 4 [Source:MGI Symbol;Acc:MGI:1350932]                                  | ILMN_3132361 | 16  | 24  | -1.51 |
| Gm28373       | predicted gene 28373 [Source:MGI Symbol;Acc:MGI:5579079]                                            | ILMN_1257115 | 15  | 23  | -1.51 |
| Camk1g        | calcium/calmodulin-dependent protein kinase I gamma [Source:MGI Symbol;Acc:MGI:2388073]             | ILMN_2856865 | 31  | 46  | -1.51 |
| Crtap         | cartilage associated protein [Source:MGI Symbol;Acc:MGI:1891221]                                    | ILMN_2877541 | 41  | 62  | -1.51 |
| Vcan          | versican [Source:MGI Symbol;Acc:MGI:102889]                                                         | ILMN_2865704 | 38  | 57  | -1.51 |
| Mgat1         | mannoside acetylglucosaminyltransferase 1 [Source:MGI Symbol;Acc:MGI:96973]                         | ILMN_3058137 | 15  | 22  | -1.52 |
| Srsf3         | serine/arginine-rich splicing factor 3 [Source:MGI Symbol;Acc:MGI:98285]                            | ILMN_2733399 | 63  | 96  | -1.52 |
| Nfrkb         | nuclear factor related to kappa B binding protein [Source:MGI Symbol;Acc:MGI:2442410]               | ILMN_2830686 | 78  | 119 | -1.52 |
| Cox16         | cytochrome c oxidase assembly protein 16                                                            | ILMN_2970900 | 17  | 27  | -1.52 |

|              |                                                                                                                                    |              |     |     |       |
|--------------|------------------------------------------------------------------------------------------------------------------------------------|--------------|-----|-----|-------|
| Katnb1l      | katanin p80 subunit B like 1                                                                                                       | ILMN_1255301 | 27  | 42  | -1.52 |
| Adamts13     | a disintegrin-like and metallopeptidase (reprolysin type) with thrombospondin type 1 motif, 13 [Source:MGI Symbol;Acc:MGI:2685556] | ILMN_3112856 | 18  | 28  | -1.52 |
| Kmt5b        | lysine methyltransferase 5B [Source:MGI Symbol;Acc:MGI:2444557]                                                                    | ILMN_2996601 | 81  | 123 | -1.52 |
| Ttc37        | tetratricopeptide repeat domain 37 [Source:MGI Symbol;Acc:MGI:2679923]                                                             | ILMN_3135991 | 30  | 45  | -1.52 |
| Chp1         | calcineurin-like EF hand protein 1 [Source:MGI Symbol;Acc:MGI:1927185]                                                             | ILMN_1252602 | 24  | 37  | -1.52 |
| Zc3hav1      | zinc finger CCCH type, antiviral 1 [Source:MGI Symbol;Acc:MGI:1926031]                                                             | ILMN_2516157 | 19  | 28  | -1.52 |
| LOC100045617 | PREDICTED: Mus musculus similar to Eukaryotic translation initiation factor 4A2 (LOC100045617), mRNA.                              | ILMN_2613641 | 210 | 319 | -1.52 |
| Ngb          | neuroglobin [Source:MGI Symbol;Acc:MGI:2151886]                                                                                    | ILMN_2895873 | 28  | 42  | -1.52 |
| Aldh7a1      | aldehyde dehydrogenase family 7, member A1 [Source:MGI Symbol;Acc:MGI:108186]                                                      | ILMN_2590532 | 16  | 24  | -1.52 |
| Reep6        | receptor accessory protein 6 [Source:MGI Symbol;Acc:MGI:1917585]                                                                   | ILMN_2661650 | 100 | 152 | -1.52 |
| Cog8         | component of oligomeric golgi complex 8 [Source:MGI Symbol;Acc:MGI:2142885]                                                        | ILMN_2595383 | 119 | 182 | -1.53 |
| Aifm1        | apoptosis-inducing factor, mitochondrion-associated 1 [Source:MGI Symbol;Acc:MGI:1349419]                                          | ILMN_2881263 | 16  | 25  | -1.53 |
| Lix1         | limb and CNS expressed 1                                                                                                           | ILMN_2738146 | 24  | 36  | -1.53 |
| Tmed3        | transmembrane p24 trafficking protein 3 [Source:MGI Symbol;Acc:MGI:1913361]                                                        | ILMN_2650532 | 28  | 42  | -1.53 |
| Cd37         | CD37 antigen                                                                                                                       | ILMN_2929526 | 17  | 26  | -1.53 |
| Atp11c       | Mus musculus ATPase, class VI, type 11C (Atp11c), transcript variant 1, mRNA.                                                      | ILMN_3073665 | 31  | 48  | -1.53 |
| Nrg1         | neuregulin 1 [Source:MGI Symbol;Acc:MGI:96083]                                                                                     | ILMN_2971688 | 93  | 142 | -1.53 |
| Dsg1c        | desmoglein 1 gamma [Source:MGI Symbol;Acc:MGI:2664358]                                                                             | ILMN_3001560 | 18  | 27  | -1.53 |
| Auts2        | autism susceptibility candidate 2 [Source:MGI Symbol;Acc:MGI:1919847]                                                              | ILMN_2675765 | 14  | 22  | -1.53 |
| Telo2        | telomere maintenance 2 [Source:MGI Symbol;Acc:MGI:1918968]                                                                         | ILMN_2734797 | 15  | 23  | -1.53 |
| Zfp395       | zinc finger protein 395 [Source:MGI Symbol;Acc:MGI:2682318]                                                                        | ILMN_2512442 | 100 | 153 | -1.53 |
| Mb21d2       | Mab-21 domain containing 2 [Source:MGI Symbol;Acc:MGI:1917028]                                                                     | ILMN_1212632 | 31  | 48  | -1.53 |
| Col11a2      | collagen, type XI, alpha 2 [Source:MGI Symbol;Acc:MGI:88447]                                                                       | ILMN_2865074 | 19  | 30  | -1.53 |
| Banf1        | barrier to autointegration factor 1 [Source:MGI Symbol;Acc:MGI:1346330]                                                            | ILMN_2698392 | 88  | 136 | -1.53 |
| Slc25a22     | solute carrier family 25 (mitochondrial carrier, glutamate), member 22 [Source:MGI Symbol;Acc:MGI:1915517]                         | ILMN_2737237 | 19  | 30  | -1.54 |
| Sema6b       | sema domain, transmembrane domain (TM), and cytoplasmic domain, (semaphorin) 6B [Source:MGI Symbol;Acc:MGI:1202889]                | ILMN_2769285 | 285 | 438 | -1.54 |
| Khdrbs3      | KH domain containing, RNA binding, signal transduction associated 3 [Source:MGI Symbol;Acc:MGI:1313312]                            | ILMN_2590488 | 80  | 122 | -1.54 |
| Ldlrap1      | low density lipoprotein receptor adaptor protein 1                                                                                 | ILMN_2606136 | 19  | 29  | -1.54 |

|          |                                                                                             |              |     |     |       |
|----------|---------------------------------------------------------------------------------------------|--------------|-----|-----|-------|
| Pon3     | paraoxonase 3 [Source:MGI Symbol;Acc:MGI:106686]                                            | ILMN_2867241 | 38  | 58  | -1.54 |
| Pomt1    | protein-O-mannosyltransferase 1 [Source:MGI Symbol;Acc:MGI:2138994]                         | ILMN_2694092 | 17  | 26  | -1.54 |
| Utrn     | utrophin [Source:MGI Symbol;Acc:MGI:104631]                                                 | ILMN_2475832 | 19  | 29  | -1.54 |
| Cenpt    | centromere protein T [Source:MGI Symbol;Acc:MGI:2443939]                                    | ILMN_2653972 | 38  | 59  | -1.54 |
| Atp2b1   | ATPase, Ca <sup>++</sup> transporting, plasma membrane 1 [Source:MGI Symbol;Acc:MGI:104653] | ILMN_2878021 | 48  | 74  | -1.54 |
| Nae1     | NEDD8 activating enzyme E1 subunit 1 [Source:MGI Symbol;Acc:MGI:2384561]                    | ILMN_2955356 | 155 | 239 | -1.54 |
| Vmn1r65  | vomer nasal 1 receptor 65 [Source:MGI Symbol;Acc:MGI:3033475]                               | ILMN_2971043 | 21  | 33  | -1.55 |
| Trem12   | triggering receptor expressed on myeloid cells-like 2 [Source:MGI Symbol;Acc:MGI:2147038]   | ILMN_2980379 | 14  | 21  | -1.55 |
| Dars     | aspartyl-tRNA synthetase [Source:MGI Symbol;Acc:MGI:2442544]                                | ILMN_3102333 | 106 | 164 | -1.55 |
| Copz2    | coatamer protein complex, subunit zeta 2 [Source:MGI Symbol;Acc:MGI:1929008]                | ILMN_1237090 | 16  | 24  | -1.55 |
| Txn2     | thioredoxin 2 [Source:MGI Symbol;Acc:MGI:1929468]                                           | ILMN_1257624 | 43  | 67  | -1.55 |
| Cdk2     | cyclin-dependent kinase 2 [Source:MGI Symbol;Acc:MGI:104772]                                | ILMN_2717613 | 16  | 25  | -1.55 |
| Jam2     | junction adhesion molecule 2 [Source:MGI Symbol;Acc:MGI:1933820]                            | ILMN_2790842 | 65  | 100 | -1.55 |
| Sf3b6    | splicing factor 3B, subunit 6 [Source:MGI Symbol;Acc:MGI:1913305]                           | ILMN_2952292 | 42  | 65  | -1.55 |
| Micu2    | mitochondrial calcium uptake 2 [Source:MGI Symbol;Acc:MGI:1915764]                          | ILMN_2899174 | 142 | 221 | -1.55 |
| Myo3b    | myosin IIIB [Source:MGI Symbol;Acc:MGI:2448580]                                             | ILMN_2681248 | 16  | 24  | -1.55 |
| Pdpr     | pyruvate dehydrogenase phosphatase regulatory subunit [Source:MGI Symbol;Acc:MGI:2442188]   | ILMN_2696146 | 19  | 29  | -1.55 |
| Wdr1     | WD repeat domain 1 [Source:MGI Symbol;Acc:MGI:1337100]                                      | ILMN_2460168 | 94  | 146 | -1.56 |
| Zfp617   | zinc finger protein 617 [Source:MGI Symbol;Acc:MGI:2684459]                                 | ILMN_2503418 | 14  | 22  | -1.56 |
| Nkx2-1   | NK2 homeobox 1 [Source:MGI Symbol;Acc:MGI:108067]                                           | ILMN_1260212 | 278 | 434 | -1.56 |
| Tnrc6b   | trinucleotide repeat containing 6b [Source:MGI Symbol;Acc:MGI:2443730]                      | ILMN_3109164 | 147 | 229 | -1.56 |
| Lurap11  | leucine rich adaptor protein 1-like [Source:MGI Symbol;Acc:MGI:106510]                      | ILMN_2646296 | 21  | 33  | -1.56 |
| Med7     | mediator complex subunit 7 [Source:MGI Symbol;Acc:MGI:1913463]                              | ILMN_1225666 | 47  | 73  | -1.56 |
| Dpp6     | dipeptidylpeptidase 6 [Source:MGI Symbol;Acc:MGI:94921]                                     | ILMN_2627619 | 41  | 64  | -1.56 |
| Fam171a2 | family with sequence similarity 171, member A2 [Source:MGI Symbol;Acc:MGI:2448496]          | ILMN_2625725 | 22  | 35  | -1.56 |
| Slc35f2  | solute carrier family 35, member F2 [Source:MGI Symbol;Acc:MGI:1919272]                     | ILMN_1234306 | 20  | 31  | -1.56 |
| Slc25a39 | solute carrier family 25, member 39                                                         | ILMN_2855261 | 45  | 70  | -1.57 |
| Sacs     | sacsin [Source:MGI Symbol;Acc:MGI:1354724]                                                  | ILMN_1227736 | 19  | 29  | -1.57 |
| Mrrf     | mitochondrial ribosome recycling factor                                                     | ILMN_2940766 | 23  | 37  | -1.57 |
| Acvr1c   | activin A receptor, type IC [Source:MGI Symbol;Acc:MGI:2661081]                             | ILMN_2614086 | 47  | 73  | -1.57 |

|         |                                                                                       |              |     |     |       |
|---------|---------------------------------------------------------------------------------------|--------------|-----|-----|-------|
| Wbp1    | WW domain binding protein 1                                                           | ILMN_2951120 | 20  | 31  | -1.57 |
| Il20rb  | interleukin 20 receptor beta [Source:MGI Symbol;Acc:MGI:2143266]                      | ILMN_2541562 | 17  | 27  | -1.57 |
| Ttc19   | tetratricopeptide repeat domain 19 [Source:MGI Symbol;Acc:MGI:1920045]                | ILMN_3141781 | 17  | 28  | -1.58 |
| Tubb2b  | tubulin, beta 2B class IIB [Source:MGI Symbol;Acc:MGI:1920960]                        | ILMN_2598715 | 18  | 28  | -1.58 |
| Tbc1d9  | TBC1 domain family, member 9 [Source:MGI Symbol;Acc:MGI:1918560]                      | ILMN_1228165 | 103 | 162 | -1.58 |
| Entpd5  | ectonucleoside triphosphate diphosphohydrolase 5 [Source:MGI Symbol;Acc:MGI:1321385]  | ILMN_3149143 | 24  | 37  | -1.58 |
| Rbfox2  | RNA binding protein, fox-1 homolog (C. elegans) 2 [Source:MGI Symbol;Acc:MGI:1933973] | ILMN_2670527 | 52  | 82  | -1.58 |
| Tor1b   | torsin family 1, member B [Source:MGI Symbol;Acc:MGI:1353605]                         | ILMN_1240146 | 37  | 59  | -1.58 |
| Sp6     | trans-acting transcription factor 6 [Source:MGI Symbol;Acc:MGI:1932575]               | ILMN_2993473 | 16  | 26  | -1.58 |
| Mpg     | N-methylpurine-DNA glycosylase [Source:MGI Symbol;Acc:MGI:97073]                      | ILMN_2600753 | 18  | 28  | -1.58 |
| Igsf1   | immunoglobulin superfamily, member 1 [Source:MGI Symbol;Acc:MGI:2147913]              | ILMN_2759192 | 18  | 29  | -1.58 |
| Otub2   | OTU domain, ubiquitin aldehyde binding 2 [Source:MGI Symbol;Acc:MGI:1915399]          | ILMN_2898917 | 15  | 24  | -1.59 |
| Banf1   | barrier to autointegration factor 1 [Source:MGI Symbol;Acc:MGI:1346330]               | ILMN_3158909 | 83  | 132 | -1.59 |
| Irgc1   | immunity-related GTPase family, cinema 1 [Source:MGI Symbol;Acc:MGI:2685948]          | ILMN_2656211 | 16  | 25  | -1.59 |
| Ccdc88a | coiled coil domain containing 88A [Source:MGI Symbol;Acc:MGI:1925177]                 | ILMN_1258136 | 48  | 76  | -1.59 |
| Atf1    | activating transcription factor 1 [Source:MGI Symbol;Acc:MGI:1298366]                 | ILMN_2715664 | 17  | 27  | -1.59 |
| Galc    | galactosylceramidase [Source:MGI Symbol;Acc:MGI:95636]                                | ILMN_1247261 | 18  | 29  | -1.59 |
| Vps33a  | VPS33A CORVET/HOPS core subunit [Source:MGI Symbol;Acc:MGI:1924823]                   | ILMN_1222817 | 20  | 31  | -1.59 |
| H2afx   | H2A histone family, member X [Source:MGI Symbol;Acc:MGI:102688]                       | ILMN_2907878 | 165 | 263 | -1.59 |
| Ncaph2  | non-SMC condensin II complex, subunit H2 [Source:MGI Symbol;Acc:MGI:1289164]          | ILMN_2745532 | 52  | 83  | -1.59 |
| Tmem164 | transmembrane protein 164 [Source:MGI Symbol;Acc:MGI:2148020]                         | ILMN_2748271 | 37  | 59  | -1.59 |
| Vps29   | VPS29 retromer complex component [Source:MGI Symbol;Acc:MGI:1928344]                  | ILMN_2446175 | 129 | 207 | -1.60 |
| Samd7   | sterile alpha motif domain containing 7 [Source:MGI Symbol;Acc:MGI:1923203]           | ILMN_2741563 | 17  | 26  | -1.60 |
| G6pdx   | glucose-6-phosphate dehydrogenase X-linked [Source:MGI Symbol;Acc:MGI:105979]         | ILMN_2721337 | 82  | 131 | -1.60 |
| Inha    | inhibin alpha [Source:MGI Symbol;Acc:MGI:96569]                                       | ILMN_1239270 | 19  | 30  | -1.60 |
| Nucb1   | nucleobindin 1 [Source:MGI Symbol;Acc:MGI:97388]                                      | ILMN_2908735 | 104 | 166 | -1.60 |
| Gpr180  | G protein-coupled receptor 180 [Source:MGI Symbol;Acc:MGI:1930949]                    | ILMN_3161518 | 25  | 40  | -1.60 |
| Dnaaf1  | dynein, axonemal assembly factor 1 [Source:MGI Symbol;Acc:MGI:1915520]                | ILMN_2696418 | 13  | 21  | -1.60 |
| Foxb1   | forkhead box B1 [Source:MGI Symbol;Acc:MGI:1927549]                                   | ILMN_2770246 | 13  | 20  | -1.61 |

|               |                                                                                                                           |              |     |     |       |
|---------------|---------------------------------------------------------------------------------------------------------------------------|--------------|-----|-----|-------|
| Srsf3         | serine/arginine-rich splicing factor 3 [Source:MGI Symbol;Acc:MGI:98285]                                                  | ILMN_2733398 | 55  | 89  | -1.61 |
| Ppp2r5d       | protein phosphatase 2, regulatory subunit B', delta [Source:MGI Symbol;Acc:MGI:2388481]                                   | ILMN_2956881 | 22  | 36  | -1.61 |
| Trpc4ap       | transient receptor potential cation channel, subfamily C, member 4 associated protein [Source:MGI Symbol;Acc:MGI:1930751] | ILMN_1225522 | 50  | 80  | -1.61 |
| Sgcb          | sarcoglycan, beta (dystrophin-associated glycoprotein) [Source:MGI Symbol;Acc:MGI:1346523]                                | ILMN_1222716 | 74  | 119 | -1.61 |
| Morf4l1       | mortality factor 4 like 1 [Source:MGI Symbol;Acc:MGI:1096551]                                                             | ILMN_3038459 | 130 | 209 | -1.61 |
| Elac2         | elaC ribonuclease Z 2 [Source:MGI Symbol;Acc:MGI:1890496]                                                                 | ILMN_1212672 | 29  | 46  | -1.62 |
| Pianp         | PILR alpha associated neural protein [Source:MGI Symbol;Acc:MGI:2441908]                                                  | ILMN_2642091 | 43  | 70  | -1.62 |
| Slc8a3        | solute carrier family 8 (sodium/calcium exchanger), member 3 [Source:MGI Symbol;Acc:MGI:107976]                           | ILMN_2750193 | 19  | 31  | -1.62 |
| LOC433416     | Mus musculus similar to cis-Golgi matrix protein GM130 (LOC433416), mRNA.                                                 | ILMN_2881591 | 18  | 30  | -1.62 |
| Plpp3         | phospholipid phosphatase 3 [Source:MGI Symbol;Acc:MGI:1915166]                                                            | ILMN_1247753 | 23  | 37  | -1.62 |
| Dnaja1        | DnaJ heat shock protein family (Hsp40) member A1 [Source:MGI Symbol;Acc:MGI:1270129]                                      | ILMN_2800446 | 19  | 30  | -1.62 |
| Abhd18        | abhydrolase domain containing 18 [Source:MGI Symbol;Acc:MGI:1915468]                                                      | ILMN_1259606 | 48  | 78  | -1.62 |
| Gstm1         | glutathione S-transferase, mu 1                                                                                           | ILMN_2626491 | 29  | 47  | -1.62 |
| 1190002N15Rik | RIKEN cDNA 1190002N15 gene [Source:MGI Symbol;Acc:MGI:1916111]                                                            | ILMN_3162133 | 33  | 54  | -1.62 |
| Tmem86a       | transmembrane protein 86A [Source:MGI Symbol;Acc:MGI:1915143]                                                             | ILMN_2645662 | 31  | 50  | -1.62 |
| Cnot2         | CCR4-NOT transcription complex, subunit 2 [Source:MGI Symbol;Acc:MGI:1919318]                                             | ILMN_3162796 | 41  | 66  | -1.63 |
| Cldn1         | claudin 1 [Source:MGI Symbol;Acc:MGI:1276109]                                                                             | ILMN_2870295 | 13  | 21  | -1.63 |
| Senp6         | SUMO/sentrin specific peptidase 6 [Source:MGI Symbol;Acc:MGI:1922075]                                                     | ILMN_1254100 | 20  | 32  | -1.63 |
| Dpf1          | D4, zinc and double PHD fingers family 1 [Source:MGI Symbol;Acc:MGI:1352748]                                              | ILMN_2772803 | 17  | 27  | -1.63 |
| Maneal        | mannosidase, endo-alpha-like [Source:MGI Symbol;Acc:MGI:2684896]                                                          | ILMN_3131846 | 123 | 201 | -1.63 |
| Atp11c        | ATPase, class VI, type 11C                                                                                                | ILMN_3152506 | 98  | 160 | -1.63 |
| Ddx50         | DEAD (Asp-Glu-Ala-Asp) box polypeptide 50 [Source:MGI Symbol;Acc:MGI:2182303]                                             | ILMN_1224614 | 17  | 28  | -1.63 |
| Gpr179        | G protein-coupled receptor 179 [Source:MGI Symbol;Acc:MGI:2443409]                                                        | ILMN_2756275 | 13  | 22  | -1.64 |
| Gm1604b       | Mus musculus gene model 1604B, (NCBI) (Gm1604b), mRNA.                                                                    | ILMN_2530415 | 102 | 167 | -1.64 |
| Hmg20a        | high mobility group 20A [Source:MGI Symbol;Acc:MGI:1914117]                                                               | ILMN_2968479 | 30  | 50  | -1.64 |
| Syt9          | synaptotagmin IX [Source:MGI Symbol;Acc:MGI:1926373]                                                                      | ILMN_2668020 | 51  | 84  | -1.64 |
| Chrb2         | cholinergic receptor, nicotinic, beta polypeptide 2 (neuronal) [Source:MGI Symbol;Acc:MGI:87891]                          | ILMN_2759307 | 66  | 108 | -1.64 |
| Clcn3         | chloride channel, voltage-sensitive 3 [Source:MGI Symbol;Acc:MGI:103555]                                                  | ILMN_2722081 | 148 | 244 | -1.64 |

|          |                                                                                                 |              |     |     |       |
|----------|-------------------------------------------------------------------------------------------------|--------------|-----|-----|-------|
| Camkk2   | calcium/calmodulin-dependent protein kinase kinase 2, beta [Source:MGI Symbol;Acc:MGI:2444812]  | ILMN_1256263 | 15  | 25  | -1.64 |
| Prkca    | protein kinase C, alpha [Source:MGI Symbol;Acc:MGI:97595]                                       | ILMN_1217890 | 150 | 246 | -1.65 |
| Tmem220  | transmembrane protein 220 [Source:MGI Symbol;Acc:MGI:2443691]                                   | ILMN_1228417 | 30  | 49  | -1.65 |
| Rnf24    | ring finger protein 24 [Source:MGI Symbol;Acc:MGI:1261771]                                      | ILMN_1212840 | 15  | 25  | -1.65 |
| Slc38a4  | solute carrier family 38, member 4 [Source:MGI Symbol;Acc:MGI:1916604]                          | ILMN_1215803 | 56  | 92  | -1.65 |
| Chchd3   | coiled-coil-helix-coiled-coil-helix domain containing 3 [Source:MGI Symbol;Acc:MGI:1913325]     | ILMN_1243188 | 14  | 23  | -1.65 |
| Cox6b2   | cytochrome c oxidase subunit VIb polypeptide 2 [Source:MGI Symbol;Acc:MGI:3044182]              | ILMN_2764551 | 24  | 40  | -1.65 |
| Ralgps2  | Ral GEF with PH domain and SH3 binding motif 2 [Source:MGI Symbol;Acc:MGI:1925505]              | ILMN_2705139 | 14  | 23  | -1.65 |
| Surf1    | surfeit gene 1 [Source:MGI Symbol;Acc:MGI:98443]                                                | ILMN_2657141 | 26  | 42  | -1.65 |
| BC003331 | cDNA sequence BC003331 [Source:MGI Symbol;Acc:MGI:2385108]                                      | ILMN_3021807 | 23  | 38  | -1.65 |
| Prep     | prolyl endopeptidase [Source:MGI Symbol;Acc:MGI:1270863]                                        | ILMN_1259561 | 21  | 34  | -1.65 |
| Igsf11   | immunoglobulin superfamily, member 11 [Source:MGI Symbol;Acc:MGI:2388477]                       | ILMN_1237582 | 35  | 57  | -1.65 |
| Fabp3    | fatty acid binding protein 3, muscle and heart                                                  | ILMN_2887630 | 110 | 182 | -1.65 |
| Bcat1    | branched chain aminotransferase 1, cytosolic [Source:MGI Symbol;Acc:MGI:104861]                 | ILMN_2656827 | 29  | 48  | -1.65 |
| Tmod2    | tropomodulin 2 [Source:MGI Symbol;Acc:MGI:1355335]                                              | ILMN_3040018 | 19  | 31  | -1.66 |
| Nomo1    | nodal modulator 1 [Source:MGI Symbol;Acc:MGI:2385850]                                           | ILMN_2626389 | 81  | 134 | -1.66 |
| Fgfr3    | fibroblast growth factor receptor 3 [Source:MGI Symbol;Acc:MGI:95524]                           | ILMN_2590766 | 23  | 39  | -1.66 |
| Ints7    | integrator complex subunit 7 [Source:MGI Symbol;Acc:MGI:1924315]                                | ILMN_2726174 | 20  | 34  | -1.66 |
| Pde4d    | phosphodiesterase 4D, cAMP specific [Source:MGI Symbol;Acc:MGI:99555]                           | ILMN_1215021 | 24  | 40  | -1.66 |
| Hnmt     | histamine N-methyltransferase [Source:MGI Symbol;Acc:MGI:2153181]                               | ILMN_2713463 | 15  | 25  | -1.66 |
| Pon3     | paraoxonase 3 [Source:MGI Symbol;Acc:MGI:106686]                                                | ILMN_2659006 | 13  | 22  | -1.66 |
| Npy1r    | neuropeptide Y receptor Y1 [Source:MGI Symbol;Acc:MGI:104963]                                   | ILMN_1259965 | 32  | 53  | -1.66 |
| Scgn     | secretagoin, EF-hand calcium binding protein [Source:MGI Symbol;Acc:MGI:2384873]                | ILMN_1227332 | 15  | 26  | -1.67 |
| Wdr37    | WD repeat domain 37 [Source:MGI Symbol;Acc:MGI:1920393]                                         | ILMN_3047987 | 71  | 118 | -1.67 |
| Mdk      | midkine                                                                                         | ILMN_3080012 | 14  | 24  | -1.67 |
| Phka2    | phosphorylase kinase alpha 2 [Source:MGI Symbol;Acc:MGI:97577]                                  | ILMN_2725083 | 21  | 35  | -1.67 |
| Cacng5   | calcium channel, voltage-dependent, gamma subunit 5 [Source:MGI Symbol;Acc:MGI:2157946]         | ILMN_1226821 | 44  | 74  | -1.67 |
| Pctp     | phosphatidylcholine transfer protein [Source:MGI Symbol;Acc:MGI:107375]                         | ILMN_2705979 | 16  | 27  | -1.67 |
| Tepsin   | TEPSIN, adaptor related protein complex 4 accessory protein [Source:MGI Symbol;Acc:MGI:1926027] | ILMN_2775300 | 19  | 32  | -1.67 |



|               |                                                                                             |              |     |     |       |
|---------------|---------------------------------------------------------------------------------------------|--------------|-----|-----|-------|
| Srsf12        | serine/arginine-rich splicing factor 12 [Source:MGI Symbol;Acc:MGI:2661424]                 | ILMN_2953888 | 78  | 131 | -1.67 |
| Chm           | choroideremia (RAB escort protein 1) [Source:MGI Symbol;Acc:MGI:892979]                     | ILMN_3151210 | 40  | 67  | -1.68 |
| Snap47        | synaptosomal-associated protein, 47 [Source:MGI Symbol;Acc:MGI:1915076]                     | ILMN_2710151 | 29  | 48  | -1.68 |
| Sdk2          | sidekick cell adhesion molecule 2 [Source:MGI Symbol;Acc:MGI:2443847]                       | ILMN_2622241 | 32  | 55  | -1.68 |
| Chrd          | chordin [Source:MGI Symbol;Acc:MGI:1313268]                                                 | ILMN_2765047 | 34  | 57  | -1.68 |
| Phka2         | phosphorylase kinase alpha 2 [Source:MGI Symbol;Acc:MGI:97577]                              | ILMN_2725082 | 18  | 31  | -1.68 |
| St3gal1       | ST3 beta-galactoside alpha-2,3-sialyltransferase 1                                          | ILMN_2749178 | 16  | 26  | -1.68 |
| Jade3         | jade family PHD finger 3 [Source:MGI Symbol;Acc:MGI:2148019]                                | ILMN_1238998 | 13  | 22  | -1.68 |
| Dusp2         | dual specificity phosphatase 2 [Source:MGI Symbol;Acc:MGI:101911]                           | ILMN_1242406 | 12  | 20  | -1.69 |
| Emc1          | ER membrane protein complex subunit 1 [Source:MGI Symbol;Acc:MGI:2443696]                   | ILMN_3158659 | 90  | 152 | -1.69 |
| Trim46        | tripartite motif-containing 46 [Source:MGI Symbol;Acc:MGI:2673000]                          | ILMN_2521395 | 78  | 131 | -1.69 |
| Map3k1        | mitogen-activated protein kinase kinase kinase 1 [Source:MGI Symbol;Acc:MGI:1346872]        | ILMN_3006611 | 38  | 64  | -1.69 |
| Fbxw8         | F-box and WD-40 domain protein 8 [Source:MGI Symbol;Acc:MGI:1923041]                        | ILMN_2708519 | 14  | 24  | -1.70 |
| Sct           | secretin [Source:MGI Symbol;Acc:MGI:99466]                                                  | ILMN_2592834 | 40  | 68  | -1.70 |
| Arpc1a        | actin related protein 2/3 complex, subunit 1A [Source:MGI Symbol;Acc:MGI:1928896]           | ILMN_2699700 | 37  | 63  | -1.70 |
| Exosc6        | exosome component 6                                                                         | ILMN_2685849 | 37  | 62  | -1.70 |
| Tgs1          | trimethylguanosine synthase 1 [Source:MGI Symbol;Acc:MGI:2151797]                           | ILMN_2588456 | 14  | 25  | -1.70 |
| Crem          | cAMP responsive element modulator [Source:MGI Symbol;Acc:MGI:88495]                         | ILMN_1242622 | 51  | 86  | -1.70 |
| Ankrd34a      | ankyrin repeat domain 34A [Source:MGI Symbol;Acc:MGI:3617846]                               | ILMN_3020599 | 59  | 101 | -1.71 |
| Tmem121       | transmembrane protein 121 [Source:MGI Symbol;Acc:MGI:1916445]                               | ILMN_1231884 | 26  | 45  | -1.71 |
| 8030462N17Rik | RIKEN cDNA 8030462N17 gene [Source:MGI Symbol;Acc:MGI:2444951]                              | ILMN_2963017 | 191 | 325 | -1.71 |
| Tut1          | terminal uridylyl transferase 1, U6 snRNA-specific [Source:MGI Symbol;Acc:MGI:1917294]      | ILMN_1232593 | 43  | 73  | -1.71 |
| Tmtc1         | transmembrane and tetratricopeptide repeat containing 1 [Source:MGI Symbol;Acc:MGI:3039590] | ILMN_2721218 | 115 | 196 | -1.71 |
| Ldah          | lipid droplet associated hydrolase [Source:MGI Symbol;Acc:MGI:1916082]                      | ILMN_2633457 | 54  | 92  | -1.71 |
| Pla2g15       | phospholipase A2, group XV [Source:MGI Symbol;Acc:MGI:2178076]                              | ILMN_1257060 | 96  | 166 | -1.72 |
| Mogat1        | monoacylglycerol O-acyltransferase 1 [Source:MGI Symbol;Acc:MGI:1915643]                    | ILMN_2635387 | 23  | 40  | -1.72 |
| Fuk           | fucokinase [Source:MGI Symbol;Acc:MGI:1916071]                                              | ILMN_2641632 | 31  | 53  | -1.72 |
| Rnf10         | ring finger protein 10 [Source:MGI Symbol;Acc:MGI:1859162]                                  | ILMN_2789888 | 138 | 238 | -1.72 |
| Pdpf          | pancreatic progenitor cell differentiation and proliferation factor                         | ILMN_2894984 | 28  | 49  | -1.73 |
| Tsr2          | TSR2 20S rRNA accumulation [Source:MGI Symbol;Acc:MGI:1916749]                              | ILMN_2693454 | 21  | 36  | -1.73 |

|               |                                                                                                       |              |     |     |       |
|---------------|-------------------------------------------------------------------------------------------------------|--------------|-----|-----|-------|
| Pcgf6         | polycomb group ring finger 6 [Source:MGI Symbol;Acc:MGI:1918291]                                      | ILMN_1251165 | 26  | 46  | -1.73 |
| She           | src homology 2 domain-containing transforming protein E [Source:MGI Symbol;Acc:MGI:1099462]           | ILMN_2757019 | 20  | 35  | -1.73 |
| Tbc1d14       | TBC1 domain family, member 14 [Source:MGI Symbol;Acc:MGI:1098708]                                     | ILMN_2654197 | 48  | 82  | -1.73 |
| Tas2r126      | taste receptor, type 2, member 126 [Source:MGI Symbol;Acc:MGI:2681273]                                | ILMN_2798839 | 13  | 23  | -1.73 |
| Cltb          | clathrin, light polypeptide (Lcb) [Source:MGI Symbol;Acc:MGI:1921575]                                 | ILMN_2642012 | 29  | 51  | -1.73 |
| Esr1          | estrogen receptor 1 (alpha) [Source:MGI Symbol;Acc:MGI:1352467]                                       | ILMN_2726412 | 29  | 51  | -1.73 |
| Pum2          | pumilio RNA-binding family member 2 [Source:MGI Symbol;Acc:MGI:1931751]                               | ILMN_1228635 | 47  | 82  | -1.74 |
| Rchyl1        | ring finger and CHY zinc finger domain containing 1 [Source:MGI Symbol;Acc:MGI:1915348]               | ILMN_1255376 | 36  | 63  | -1.74 |
| Mcm7          | minichromosome maintenance complex component 7 [Source:MGI Symbol;Acc:MGI:1298398]                    | ILMN_2673889 | 13  | 22  | -1.74 |
| Pigp          | phosphatidylinositol glycan anchor biosynthesis, class P [Source:MGI Symbol;Acc:MGI:1860433]          | ILMN_2592239 | 172 | 300 | -1.74 |
| Otp           | orthopedia homeobox [Source:MGI Symbol;Acc:MGI:99835]                                                 | ILMN_1227598 | 15  | 27  | -1.74 |
| Tpmt          | thiopurine methyltransferase                                                                          | ILMN_2800466 | 19  | 34  | -1.74 |
| Hnrnp3        | heterogeneous nuclear ribonucleoprotein H3 [Source:MGI Symbol;Acc:MGI:1926462]                        | ILMN_2958912 | 31  | 55  | -1.74 |
| Plcg2         | phospholipase C, gamma 2 [Source:MGI Symbol;Acc:MGI:97616]                                            | ILMN_2601833 | 34  | 59  | -1.74 |
| Emc1          | ER membrane protein complex subunit 1 [Source:MGI Symbol;Acc:MGI:2443696]                             | ILMN_1249433 | 73  | 127 | -1.74 |
| Sgms2         | sphingomyelin synthase 2 [Source:MGI Symbol;Acc:MGI:1921692]                                          | ILMN_1227663 | 14  | 24  | -1.75 |
| Fam49b        | family with sequence similarity 49, member B [Source:MGI Symbol;Acc:MGI:1923520]                      | ILMN_1235939 | 15  | 27  | -1.75 |
| Sf3a2         | splicing factor 3a, subunit 2 [Source:MGI Symbol;Acc:MGI:104912]                                      | ILMN_1223689 | 23  | 39  | -1.75 |
| Arid5b        | AT rich interactive domain 5B (MRF1-like) [Source:MGI Symbol;Acc:MGI:2175912]                         | ILMN_3031781 | 25  | 44  | -1.75 |
| Tm6sf1        | transmembrane 6 superfamily member 1                                                                  | ILMN_2886981 | 22  | 39  | -1.75 |
| Slc6a15       | solute carrier family 6 (neurotransmitter transporter), member 15 [Source:MGI Symbol;Acc:MGI:2143484] | ILMN_1258914 | 21  | 36  | -1.76 |
| Ncoa6         | nuclear receptor coactivator 6 [Source:MGI Symbol;Acc:MGI:1929915]                                    | ILMN_1229545 | 21  | 36  | -1.76 |
| Bend7         | BEN domain containing 7 [Source:MGI Symbol;Acc:MGI:2443100]                                           | ILMN_2590042 | 40  | 71  | -1.76 |
| 6430548M08Rik | RIKEN cDNA 6430548M08 gene [Source:MGI Symbol;Acc:MGI:2443793]                                        | ILMN_2599214 | 66  | 117 | -1.77 |
| Pip4k2b       | phosphatidylinositol-5-phosphate 4-kinase, type II, beta [Source:MGI Symbol;Acc:MGI:1934234]          | ILMN_2623967 | 15  | 26  | -1.77 |
| D6Wsu163e     | DNA segment, Chr 6, Wayne State University 163, expressed [Source:MGI Symbol;Acc:MGI:107893]          | ILMN_2596324 | 28  | 49  | -1.77 |
| Kdm8          | lysine (K)-specific demethylase 8 [Source:MGI Symbol;Acc:MGI:1924285]                                 | ILMN_1244329 | 36  | 63  | -1.77 |

|          |                                                                                                                         |              |     |     |       |
|----------|-------------------------------------------------------------------------------------------------------------------------|--------------|-----|-----|-------|
| Pofut1   | protein O-fucosyltransferase 1 [Source:MGI Symbol;Acc:MGI:2153207]                                                      | ILMN_2599360 | 26  | 47  | -1.77 |
| Zbtb33   | zinc finger and BTB domain containing 33 [Source:MGI Symbol;Acc:MGI:1927290]                                            | ILMN_1247277 | 19  | 33  | -1.78 |
| Sgcd     | sarcoglycan, delta (dystrophin-associated glycoprotein) [Source:MGI Symbol;Acc:MGI:1346525]                             | ILMN_2696134 | 20  | 35  | -1.78 |
| Mrps21   | mitochondrial ribosomal protein S21 [Source:MGI Symbol;Acc:MGI:1913542]                                                 | ILMN_2745555 | 34  | 60  | -1.78 |
| Pfkl     | phosphofructokinase, liver, B-type [Source:MGI Symbol;Acc:MGI:97547]                                                    | ILMN_2871325 | 34  | 60  | -1.78 |
| Vps33b   | vacuolar protein sorting 33B [Source:MGI Symbol;Acc:MGI:2446237]                                                        | ILMN_2422410 | 19  | 35  | -1.78 |
| Gbp2     | guanylate binding protein 2 [Source:MGI Symbol;Acc:MGI:102772]                                                          | ILMN_3047389 | 16  | 28  | -1.79 |
| Atp2c1   | ATPase, Ca <sup>++</sup> -sequestering [Source:MGI Symbol;Acc:MGI:1889008]                                              | ILMN_2658392 | 100 | 179 | -1.79 |
| Itgb4    | integrin beta 4 [Source:MGI Symbol;Acc:MGI:96613]                                                                       | ILMN_2634689 | 25  | 44  | -1.79 |
| Nr0b1    | nuclear receptor subfamily 0, group B, member 1 [Source:MGI Symbol;Acc:MGI:1352460]                                     | ILMN_2615796 | 31  | 55  | -1.79 |
| Ccdc28b  | coiled coil domain containing 28B [Source:MGI Symbol;Acc:MGI:1913514]                                                   | ILMN_1220430 | 33  | 59  | -1.79 |
| Pla2g12a | phospholipase A2, group XIIA [Source:MGI Symbol;Acc:MGI:1913600]                                                        | ILMN_2636536 | 108 | 194 | -1.80 |
| Rprd2    | regulation of nuclear pre-mRNA domain containing 2 [Source:MGI Symbol;Acc:MGI:1922387]                                  | ILMN_3081402 | 19  | 34  | -1.80 |
| Grb7     | growth factor receptor bound protein 7 [Source:MGI Symbol;Acc:MGI:102683]                                               | ILMN_2773169 | 34  | 61  | -1.80 |
| Kcnj12   | potassium inwardly-rectifying channel, subfamily J, member 12 [Source:MGI Symbol;Acc:MGI:108495]                        | ILMN_2695900 | 34  | 61  | -1.80 |
| Pmm2     | phosphomannomutase 2 [Source:MGI Symbol;Acc:MGI:1859214]                                                                | ILMN_2724530 | 17  | 30  | -1.80 |
| Scnn1a   | sodium channel, nonvoltage-gated 1 alpha [Source:MGI Symbol;Acc:MGI:101782]                                             | ILMN_2729607 | 22  | 40  | -1.80 |
| Npas4    | neuronal PAS domain protein 4 [Source:MGI Symbol;Acc:MGI:2664186]                                                       | ILMN_2596527 | 14  | 26  | -1.80 |
| Ms4a7    | membrane-spanning 4-domains, subfamily A, member 7 [Source:MGI Symbol;Acc:MGI:1918846]                                  | ILMN_3091003 | 13  | 23  | -1.81 |
| Lix1     | limb and CNS expressed 1 [Source:MGI Symbol;Acc:MGI:1913893]                                                            | ILMN_2686593 | 14  | 25  | -1.81 |
| Ipo4     | importin 4 [Source:MGI Symbol;Acc:MGI:1923001]                                                                          | ILMN_2703099 | 45  | 81  | -1.82 |
| Slc11a2  | solute carrier family 11 (proton-coupled divalent metal ion transporters), member 2 [Source:MGI Symbol;Acc:MGI:1345279] | ILMN_2665063 | 18  | 32  | -1.82 |
| Lcor     | ligand dependent nuclear receptor corepressor [Source:MGI Symbol;Acc:MGI:2443930]                                       | ILMN_2650511 | 25  | 45  | -1.83 |
| Rwdd3    | RWD domain containing 3 [Source:MGI Symbol;Acc:MGI:1920420]                                                             | ILMN_1236100 | 16  | 29  | -1.83 |
| Htr1a    | 5-hydroxytryptamine (serotonin) receptor 1A [Source:MGI Symbol;Acc:MGI:96273]                                           | ILMN_2664762 | 20  | 36  | -1.83 |
| Gart     | phosphoribosylglycinamide formyltransferase [Source:MGI Symbol;Acc:MGI:95654]                                           | ILMN_1225226 | 17  | 31  | -1.83 |
| Tbc1d2   | TBC1 domain family, member 2 [Source:MGI Symbol;Acc:MGI:2652885]                                                        | ILMN_3140913 | 14  | 26  | -1.83 |

|               |                                                                                                                     |              |     |     |       |
|---------------|---------------------------------------------------------------------------------------------------------------------|--------------|-----|-----|-------|
| Agfg1         | ArfGAP with FG repeats 1 [Source:MGI Symbol;Acc:MGI:1333754]                                                        | ILMN_2606072 | 23  | 42  | -1.83 |
| Srp9          | signal recognition particle 9 [Source:MGI Symbol;Acc:MGI:1350930]                                                   | ILMN_1260348 | 59  | 108 | -1.84 |
| Crem          | cAMP responsive element modulator [Source:MGI Symbol;Acc:MGI:88495]                                                 | ILMN_2602899 | 38  | 70  | -1.84 |
| Plpp7         | phospholipid phosphatase 7 (inactive) [Source:MGI Symbol;Acc:MGI:2445183]                                           | ILMN_1215127 | 16  | 29  | -1.84 |
| Nudt6         | nudix (nucleoside diphosphate linked moiety X)-type motif 6 [Source:MGI Symbol;Acc:MGI:2387618]                     | ILMN_1253773 | 27  | 50  | -1.84 |
| Gpr75         | G protein-coupled receptor 75 [Source:MGI Symbol;Acc:MGI:2441843]                                                   | ILMN_3161775 | 39  | 71  | -1.85 |
| Zfp26         | zinc finger protein 26 [Source:MGI Symbol;Acc:MGI:99173]                                                            | ILMN_2945607 | 33  | 60  | -1.85 |
| Spcs1         | signal peptidase complex subunit 1 homolog (S. cerevisiae) [Source:MGI Symbol;Acc:MGI:1916269]                      | ILMN_2728320 | 31  | 57  | -1.85 |
| Pcdhb21       | protocadherin beta 21 [Source:MGI Symbol;Acc:MGI:2136759]                                                           | ILMN_2696207 | 19  | 36  | -1.85 |
| Tnks          | tankyrase, TRF1-interacting ankyrin-related ADP-ribose polymerase [Source:MGI Symbol;Acc:MGI:1341087]               | ILMN_1250052 | 29  | 53  | -1.85 |
| Cacng5        | calcium channel, voltage-dependent, gamma subunit 5 [Source:MGI Symbol;Acc:MGI:2157946]                             | ILMN_2725698 | 112 | 207 | -1.85 |
| Reck          | reversion-inducing-cysteine-rich protein with kazal motifs [Source:MGI Symbol;Acc:MGI:1855698]                      | ILMN_2812614 | 19  | 35  | -1.85 |
| Saa1          | serum amyloid A 1 [Source:MGI Symbol;Acc:MGI:98221]                                                                 | ILMN_2826869 | 13  | 23  | -1.85 |
| Large2        | LARGE xylosyl- and glucuronyltransferase 2 [Source:MGI Symbol;Acc:MGI:2443769]                                      | ILMN_1235131 | 16  | 30  | -1.85 |
| Dlk1          | delta-like 1 homolog (Drosophila) [Source:MGI Symbol;Acc:MGI:94900]                                                 | ILMN_1244618 | 205 | 380 | -1.86 |
| Lca5          | Leber congenital amaurosis 5 (human) [Source:MGI Symbol;Acc:MGI:1923032]                                            | ILMN_3097107 | 85  | 159 | -1.86 |
| Fgf14         | fibroblast growth factor 14 [Source:MGI Symbol;Acc:MGI:109189]                                                      | ILMN_2744522 | 19  | 35  | -1.86 |
| Pum1          | pumilio RNA-binding family member 1                                                                                 | ILMN_1223937 | 183 | 341 | -1.86 |
| Dolpp1        | dolichyl pyrophosphate phosphatase 1 [Source:MGI Symbol;Acc:MGI:1914093]                                            | ILMN_2718090 | 19  | 35  | -1.87 |
| Lrrtm4        | leucine rich repeat transmembrane neuronal 4 [Source:MGI Symbol;Acc:MGI:2389180]                                    | ILMN_2611687 | 23  | 43  | -1.88 |
| Gabra3        | gamma-aminobutyric acid (GABA) A receptor, subunit alpha 3 [Source:MGI Symbol;Acc:MGI:95615]                        | ILMN_2595601 | 61  | 115 | -1.88 |
| 4930550C14Rik | RIKEN cDNA 4930550C14 gene [Source:MGI Symbol;Acc:MGI:1922561]                                                      | ILMN_1250814 | 17  | 32  | -1.88 |
| Mapt          | microtubule-associated protein tau [Source:MGI Symbol;Acc:MGI:97180]                                                | ILMN_3034121 | 21  | 40  | -1.89 |
| Stag3         | stromal antigen 3 [Source:MGI Symbol;Acc:MGI:1355311]                                                               | ILMN_2993843 | 13  | 24  | -1.89 |
| Sema6b        | sema domain, transmembrane domain (TM), and cytoplasmic domain, (semaphorin) 6B [Source:MGI Symbol;Acc:MGI:1202889] | ILMN_2623920 | 14  | 26  | -1.89 |
| Nfasc         | neurofascin [Source:MGI Symbol;Acc:MGI:104753]                                                                      | ILMN_2648812 | 16  | 29  | -1.89 |
| Cenpx         | centromere protein X [Source:MGI Symbol;Acc:MGI:894324]                                                             | ILMN_1226798 | 20  | 38  | -1.90 |

|               |                                                                                                                           |              |    |     |       |
|---------------|---------------------------------------------------------------------------------------------------------------------------|--------------|----|-----|-------|
| Nans          | N-acetylneuraminic acid synthase (sialic acid synthase) [Source:MGI Symbol;Acc:MGI:2149820]                               | ILMN_1245757 | 53 | 100 | -1.90 |
| Ngfr          | nerve growth factor receptor (TNFR superfamily, member 16) [Source:MGI Symbol;Acc:MGI:97323]                              | ILMN_2851288 | 38 | 73  | -1.90 |
| Mars2         | methionine-tRNA synthetase 2 (mitochondrial) [Source:MGI Symbol;Acc:MGI:2444136]                                          | ILMN_2675740 | 27 | 52  | -1.91 |
| Asb7          | ankyrin repeat and SOCS box-containing 7 [Source:MGI Symbol;Acc:MGI:2152835]                                              | ILMN_2695316 | 23 | 44  | -1.91 |
| Capn7         | calpain 7 [Source:MGI Symbol;Acc:MGI:1338030]                                                                             | ILMN_2675535 | 29 | 55  | -1.92 |
| Elmo1         | engulfment and cell motility 1 [Source:MGI Symbol;Acc:MGI:2153044]                                                        | ILMN_2745055 | 20 | 39  | -1.92 |
| Nr2f2         | nuclear receptor subfamily 2, group F, member 2 [Source:MGI Symbol;Acc:MGI:1352452]                                       | ILMN_3076625 | 19 | 37  | -1.92 |
| Spata2l       | spermatogenesis associated 2-like [Source:MGI Symbol;Acc:MGI:1926029]                                                     | ILMN_1229246 | 16 | 31  | -1.93 |
| Lrrc9         | leucine rich repeat containing 9 [Source:MGI Symbol;Acc:MGI:1925507]                                                      | ILMN_1226411 | 38 | 73  | -1.93 |
| Zfp422        | zinc finger protein 422 [Source:MGI Symbol;Acc:MGI:1914505]                                                               | ILMN_2435673 | 12 | 23  | -1.93 |
| AW551984      | expressed sequence AW551984 [Source:MGI Symbol;Acc:MGI:2143322]                                                           | ILMN_1215599 | 36 | 69  | -1.93 |
| Lst1          | leukocyte specific transcript 1 [Source:MGI Symbol;Acc:MGI:1096324]                                                       | ILMN_2609323 | 15 | 28  | -1.93 |
| Neil2         | nei like 2 (E. coli) [Source:MGI Symbol;Acc:MGI:2686058]                                                                  | ILMN_2613131 | 23 | 44  | -1.93 |
| Get4          | golgi to ER traffic protein 4 [Source:MGI Symbol;Acc:MGI:1914854]                                                         | ILMN_2745954 | 31 | 60  | -1.94 |
| 2310033P09Rik | RIKEN cDNA 2310033P09 gene [Source:MGI Symbol;Acc:MGI:1915112]                                                            | ILMN_1232120 | 18 | 35  | -1.95 |
| Bbox1         | butyrobetaine (gamma), 2-oxoglutarate dioxygenase 1 (gamma-butyrobetaine hydroxylase) [Source:MGI Symbol;Acc:MGI:1891372] | ILMN_2686029 | 47 | 93  | -1.95 |
| Cacnb4        | calcium channel, voltage-dependent, beta 4 subunit [Source:MGI Symbol;Acc:MGI:103301]                                     | ILMN_3047749 | 41 | 81  | -1.97 |
| Mapk11        | mitogen-activated protein kinase 11 [Source:MGI Symbol;Acc:MGI:1338024]                                                   | ILMN_2614777 | 56 | 110 | -1.97 |
| Lrif1         | ligand dependent nuclear receptor interacting factor 1                                                                    | ILMN_2646836 | 18 | 36  | -1.97 |
| Spr2a1        | small proline-rich protein 2A1                                                                                            | ILMN_3071908 | 30 | 59  | -1.97 |
| 2610042L04Rik | Mus musculus RIKEN cDNA 2610042L04 gene (2610042L04Rik), mRNA.                                                            | ILMN_3059346 | 39 | 78  | -1.98 |
| 2310011J03Rik | RIKEN cDNA 2310011J03 gene                                                                                                | ILMN_1219918 | 26 | 51  | -1.98 |
| Zfp300        | zinc finger protein 300 [Source:MGI Symbol;Acc:MGI:3045326]                                                               | ILMN_2693330 | 34 | 67  | -1.98 |
| Fgf10         | fibroblast growth factor 10 [Source:MGI Symbol;Acc:MGI:1099809]                                                           | ILMN_2736497 | 53 | 105 | -1.98 |
| Tdg           | Mus musculus thymine DNA glycosylase (Tdg), transcript variant 1, mRNA.                                                   | ILMN_3102643 | 23 | 46  | -1.99 |
| Cachd1        | cache domain containing 1 [Source:MGI Symbol;Acc:MGI:2444177]                                                             | ILMN_1248895 | 21 | 42  | -2.00 |
| Usp21         | ubiquitin specific peptidase 21 [Source:MGI Symbol;Acc:MGI:1353665]                                                       | ILMN_2495939 | 69 | 138 | -2.00 |
| Tmem132c      | transmembrane protein 132C [Source:MGI Symbol;Acc:MGI:2443061]                                                            | ILMN_2625148 | 27 | 53  | -2.00 |
| 4930594M22Rik | RIKEN cDNA 4930594M22 gene [Source:MGI Symbol;Acc:MGI:1925478]                                                            | ILMN_2948344 | 40 | 80  | -2.01 |
| Fam129a       | family with sequence similarity 129, member A [Source:MGI                                                                 | ILMN_2591031 | 17 | 33  | -2.01 |

|          |                                                                                                   |              |    |     |       |
|----------|---------------------------------------------------------------------------------------------------|--------------|----|-----|-------|
|          | Symbol;Acc:MGI:2137237]                                                                           |              |    |     |       |
| Utp6     | UTP6 small subunit processome component [Source:MGI Symbol;Acc:MGI:2445193]                       | ILMN_2750789 | 38 | 77  | -2.01 |
| Lcor     | ligand dependent nuclear receptor corepressor [Source:MGI Symbol;Acc:MGI:2443930]                 | ILMN_2655183 | 21 | 42  | -2.01 |
| Nagk     | N-acetylglucosamine kinase [Source:MGI Symbol;Acc:MGI:1860418]                                    | ILMN_2616461 | 18 | 37  | -2.01 |
| Tpd5211  | tumor protein D52-like 1 [Source:MGI Symbol;Acc:MGI:1298386]                                      | ILMN_2434472 | 15 | 29  | -2.01 |
| Pcid2    | PCI domain containing 2 [Source:MGI Symbol;Acc:MGI:2443003]                                       | ILMN_2776271 | 59 | 119 | -2.02 |
| Elk4     | ELK4, member of ETS oncogene family [Source:MGI Symbol;Acc:MGI:102853]                            | ILMN_1231726 | 18 | 36  | -2.02 |
| Mad212   | MAD2 mitotic arrest deficient-like 2 [Source:MGI Symbol;Acc:MGI:1919140]                          | ILMN_2707015 | 37 | 75  | -2.02 |
| Oasl2    | 2'-5' oligoadenylate synthetase-like 2 [Source:MGI Symbol;Acc:MGI:1344390]                        | ILMN_2599154 | 68 | 138 | -2.03 |
| Pex3     | peroxisomal biogenesis factor 3 [Source:MGI Symbol;Acc:MGI:1929646]                               | ILMN_2801934 | 45 | 91  | -2.03 |
| Eif4a1   | Mus musculus eukaryotic translation initiation factor 4A1 (Eif4a1), mRNA.                         | ILMN_2618481 | 42 | 86  | -2.04 |
| Tmem1311 | transmembrane 131 like [Source:MGI Symbol;Acc:MGI:2443399]                                        | ILMN_2977535 | 17 | 36  | -2.04 |
| Rgp1     | RAB6A GEF complex partner 1 [Source:MGI Symbol;Acc:MGI:1915956]                                   | ILMN_2710589 | 23 | 46  | -2.04 |
| Slc9a6   | solute carrier family 9 (sodium/hydrogen exchanger), member 6 [Source:MGI Symbol;Acc:MGI:2443511] | ILMN_2617843 | 21 | 44  | -2.06 |
| Pick1    | protein interacting with C kinase 1 [Source:MGI Symbol;Acc:MGI:894645]                            | ILMN_3092815 | 17 | 35  | -2.06 |
| Cxcr4    | chemokine (C-X-C motif) receptor 4 [Source:MGI Symbol;Acc:MGI:109563]                             | ILMN_2630459 | 27 | 55  | -2.06 |
| Sesn1    | sestrin 1 [Source:MGI Symbol;Acc:MGI:2155278]                                                     | ILMN_3136744 | 56 | 115 | -2.06 |
| Dnaaf3   | dynein, axonemal assembly factor 3 [Source:MGI Symbol;Acc:MGI:3588207]                            | ILMN_2959253 | 42 | 86  | -2.06 |
| Tbcd25   | TBC1 domain family, member 25 [Source:MGI Symbol;Acc:MGI:2444862]                                 | ILMN_2722583 | 31 | 65  | -2.06 |
| Kat6b    | K(lysine) acetyltransferase 6B [Source:MGI Symbol;Acc:MGI:1858746]                                | ILMN_1230880 | 17 | 36  | -2.07 |
| Zfp622   | zinc finger protein 622 [Source:MGI Symbol;Acc:MGI:1289282]                                       | ILMN_2879570 | 14 | 29  | -2.08 |
| Adpgk    | ADP-dependent glucokinase [Source:MGI Symbol;Acc:MGI:1919391]                                     | ILMN_2657876 | 12 | 25  | -2.08 |
| Anxa9    | annexin A9 [Source:MGI Symbol;Acc:MGI:1923711]                                                    | ILMN_2715226 | 23 | 49  | -2.09 |
| Mrps25   | mitochondrial ribosomal protein S25 [Source:MGI Symbol;Acc:MGI:1928140]                           | ILMN_2680111 | 17 | 35  | -2.09 |
| Ascc2    | activating signal cointegrator 1 complex subunit 2 [Source:MGI Symbol;Acc:MGI:1922702]            | ILMN_2930922 | 24 | 50  | -2.10 |
| Kat6b    | K(lysine) acetyltransferase 6B [Source:MGI Symbol;Acc:MGI:1858746]                                | ILMN_2743320 | 18 | 38  | -2.10 |
| Rasl2-9  | RAS-like, family 2, locus 9                                                                       | ILMN_1229223 | 14 | 29  | -2.10 |
| Jkamp    | JNK1/MAPK8-associated membrane protein [Source:MGI Symbol;Acc:MGI:1915057]                        | ILMN_1223051 | 18 | 39  | -2.11 |
| Rspo4    | R-spondin 4 [Source:MGI Symbol;Acc:MGI:1924467]                                                   | ILMN_1244053 | 17 | 36  | -2.12 |
| Pcbp3    | poly(rC) binding protein 3 [Source:MGI Symbol;Acc:MGI:1890470]                                    | ILMN_1213692 | 35 | 75  | -2.12 |

|         |                                                                                                      |              |     |     |       |
|---------|------------------------------------------------------------------------------------------------------|--------------|-----|-----|-------|
| Xrn1    | 5'-3' exoribonuclease 1 [Source:MGI Symbol;Acc:MGI:891964]                                           | ILMN_2514674 | 27  | 58  | -2.12 |
| Arhgap6 | Rho GTPase activating protein 6 [Source:MGI Symbol;Acc:MGI:1196332]                                  | ILMN_2703171 | 29  | 62  | -2.13 |
| Ddx6    | DEAD (Asp-Glu-Ala-Asp) box polypeptide 6 [Source:MGI Symbol;Acc:MGI:104976]                          | ILMN_3040041 | 25  | 54  | -2.13 |
| Mpp2    | membrane protein, palmitoylated 2 (MAGUK p55 subfamily member 2) [Source:MGI Symbol;Acc:MGI:1858257] | ILMN_2595163 | 43  | 92  | -2.14 |
| Scn3b   | sodium channel, voltage-gated, type III, beta [Source:MGI Symbol;Acc:MGI:1918882]                    | ILMN_3163577 | 21  | 46  | -2.16 |
| Tsga10  | testis specific 10 [Source:MGI Symbol;Acc:MGI:2685063]                                               | ILMN_2501276 | 32  | 70  | -2.17 |
| Wnk1    | WNK lysine deficient protein kinase 1 [Source:MGI Symbol;Acc:MGI:2442092]                            | ILMN_1258991 | 27  | 58  | -2.18 |
| Fut4    | fucosyltransferase 4 [Source:MGI Symbol;Acc:MGI:95594]                                               | ILMN_2892507 | 20  | 43  | -2.18 |
| Krt73   | keratin 73 [Source:MGI Symbol;Acc:MGI:3607712]                                                       | ILMN_3007409 | 16  | 36  | -2.18 |
| Tyms-ps | Mus musculus thymidylate synthase, pseudogene (Tyms-ps), non-coding RNA.                             | ILMN_2921303 | 20  | 45  | -2.18 |
| Fezf2   | Fez family zinc finger 2 [Source:MGI Symbol;Acc:MGI:1859823]                                         | ILMN_2932692 | 24  | 54  | -2.19 |
| Atp11a  | ATPase, class VI, type 11A [Source:MGI Symbol;Acc:MGI:1354735]                                       | ILMN_2602789 | 15  | 33  | -2.20 |
| Irf5    | interferon regulatory factor 5 [Source:MGI Symbol;Acc:MGI:1350924]                                   | ILMN_2621752 | 20  | 43  | -2.21 |
| Glce    | glucuronyl C5-epimerase [Source:MGI Symbol;Acc:MGI:2136405]                                          | ILMN_2750543 | 36  | 80  | -2.22 |
| Pak7    | p21 protein (Cdc42/Rac)-activated kinase 7 [Source:MGI Symbol;Acc:MGI:1920334]                       | ILMN_1249906 | 12  | 27  | -2.24 |
| Dtna    | dystrobrevin alpha [Source:MGI Symbol;Acc:MGI:106039]                                                | ILMN_1221805 | 30  | 69  | -2.29 |
| Cnm3    | cyclin M3 [Source:MGI Symbol;Acc:MGI:2151055]                                                        | ILMN_1216036 | 19  | 44  | -2.30 |
| Tmem138 | transmembrane protein 138 [Source:MGI Symbol;Acc:MGI:1920232]                                        | ILMN_2610554 | 15  | 36  | -2.41 |
| Zfp868  | zinc finger protein 868 [Source:MGI Symbol;Acc:MGI:2142546]                                          | ILMN_3143088 | 37  | 96  | -2.59 |
| Dtna    | dystrobrevin alpha [Source:MGI Symbol;Acc:MGI:106039]                                                | ILMN_1222187 | 12  | 34  | -2.90 |
| Nek6    | NIMA (never in mitosis gene a)-related expressed kinase 6 [Source:MGI Symbol;Acc:MGI:1891638]        | ILMN_2685668 | 41  | 119 | -2.92 |
| Knop1   | lysine rich nucleolar protein 1 [Source:MGI Symbol;Acc:MGI:1913606]                                  | ILMN_2699624 | 21  | 61  | -2.94 |
| Insig1  | insulin induced gene 1 [Source:MGI Symbol;Acc:MGI:1916289]                                           | ILMN_2606693 | 22  | 67  | -3.03 |
| Trappc3 | trafficking protein particle complex 3 [Source:MGI Symbol;Acc:MGI:1351486]                           | ILMN_2503748 | 44  | 139 | -3.12 |
| Fpr2    | formyl peptide receptor 2 [Source:MGI Symbol;Acc:MGI:1278319]                                        | ILMN_1242457 | 12  | 37  | -3.18 |
| Sox6    | SRY (sex determining region Y)-box 6 [Source:MGI Symbol;Acc:MGI:98368]                               | ILMN_2702322 | 17  | 56  | -3.27 |
| Sox6    | SRY (sex determining region Y)-box 6 [Source:MGI Symbol;Acc:MGI:98368]                               | ILMN_1254646 | 17  | 56  | -3.30 |
| Dmrtc1a | DMRT-like family C1a [Source:MGI Symbol;Acc:MGI:1918137]                                             | ILMN_3144535 | 15  | 50  | -3.30 |
| Sox6    | SRY (sex determining region Y)-box 6 [Source:MGI Symbol;Acc:MGI:98368]                               | ILMN_2702323 | 19  | 62  | -3.30 |
| Dusp8   | dual specificity phosphatase 8 [Source:MGI Symbol;Acc:MGI:106626]                                    | ILMN_1228031 | 107 | 614 | -5.76 |

**Supplemental Table 3: Details on TUF Subcohort analyzed for CBF after intranasal insulin.**

| Dusp8 rs2334499 SNP                         | Total population |             |             | Males       |             |             | Females     |             |             |
|---------------------------------------------|------------------|-------------|-------------|-------------|-------------|-------------|-------------|-------------|-------------|
|                                             | (C/C)            | (C/C)       | (C/T)       | (T/T)       | (C/T)       | (T/T)       | (C/C)       | (C/T)       | (T/T)       |
| Number                                      | 15               | 11          | 10          | 6           | 20          | 12          | 4           | 10          | 6           |
| Age (years)                                 | 27 ± 5           | 28 ± 5      | 26 ± 5      | 28 ± 4      | 26 ± 4      | 27 ± 3      | 24 ± 2      | 26 ± 3      | 26 ± 2      |
| Body mass index (kg/m <sup>2</sup> )        | 25.0 ± 5.4       | 25.8 ± 5.7  | 29.3 ± 7.9  | 27.3 ± 3.4  | 28.2 ± 5.2  | 25.2 ± 3.7  | 22.9 ± 4.7  | 28.6 ± 5.2  | 23.1 ± 2.8  |
| Waist-to-hip ratio                          | 0.85 ± 0.08      | 0.89 ± 0.06 | 0.91 ± 0.08 | 0.90 ± 0.06 | 0.85 ± 0.09 | 0.83 ± 0.09 | 0.76 ± 0.06 | 0.81 ± 0.09 | 0.75 ± 0.04 |
| Body fat content (%)                        | 23.4 ± 7.5       | 20.4 ± 4.3  | 22.4 ± 7.2  | 23.1 ± 4.4  | 32.4 ± 13.1 | 27.0 ± 6.3  | 30.8 ± 9.4  | 39.7 ± 11.4 | 31.7 ± 5.0  |
| Fasting glucose (mmol/l)                    | 5.0 ± 0.5        | 5.1 ± 0.5   | 5.4 ± 0.7   | 5.0 ± 0.6   | 5.2 ± 0.5   | 4.9 ± 0.4   | 4.8 ± 0.5   | 5.2 ± 0.3   | 4.9 ± 0.2   |
| Fasting C peptide (pmol/l)                  | 397 ± 205        | 362 ± 160   | 596 ± 350   | 326 ± 73    | 532 ± 184   | 340 ± 64    | 491 ± 308   | 562 ± 209   | 355 ± 57    |
| Serum cortisol (nmol/l)                     | 460 ± 211        | 428 ± 88    | 538 ± 131   | 377 ± 114   | 481 ± 170   | 423 ± 132   | 546 ± 410   | 423 ± 191   | 470 ± 143   |
| OGTT-derived insulin sensitivity index (AU) | 15.9 ± 8.0       | 17.4 ± 8.6  | 11.1 ± 9.8  | 14.6 ± 5.1  | 11.1 ± 8.8  | 13.1 ± 4.4  | 11.7 ± 4.5  | 10.0 ± 7.8  | 11.6 ± 3.4  |
| HbA1c (%)                                   | 5.1 ± 0.3        | 5.2 ± 0.3   | 5.4 ± 0.3   | 5.2 ± 0.2   | 5.3 ± 0.2   | 5.2 ± 0.3   | 5.2 ± 0.3   | 5.2 ± 0.2   | 5.2 ± 0.3   |
| C-reactive protein (mg/dl)                  | 0.3 ± 0.4        | 0.3 ± 0.5   | 0.3 ± 0.8   | 0.3 ± 0.4   | 0.2 ± 0.2   | 0.3 ± 0.4   | 0.1 ± 0.2   | 0.2 ± 0.3   | 0.3 ± 0.4   |

Given are means ± SD.



**Supplemental Table 4: Antibodies for detection of protein levels by immunohistochemistry, immunofluorescence or western blotting.**

| <b>Antibody</b>                                 | <b>Vendor</b>             | <b>Catalogue number</b> | <b>species</b> | <b>Dilution for IHC/IF</b> | <b>Dilution for WB</b> |
|-------------------------------------------------|---------------------------|-------------------------|----------------|----------------------------|------------------------|
| P-Akt_Ser473                                    | Cell Signaling Technology | #9271                   | rabbit         |                            | 1:1200                 |
| P-Stat3                                         | Cell Signaling Technology | #9145                   | rabbit         | 1:500                      |                        |
| P-ERK_T202/Y204                                 | Cell Signaling Technology | #9101                   | rabbit         |                            | 1:1000                 |
| P-p38_T180/Y182                                 | Cell Signaling Technology | #9211                   | rabbit         |                            | 1:1000                 |
| P-Jnk_T183/Y185                                 | Promega                   | #V7931                  | rabbit         |                            | 1:1000                 |
| P-cJun_S63                                      | Cell Signaling Technology | #9261                   | rabbit         | 1:200                      | 1:2000                 |
| P-GR_Ser226                                     | Sigma-Aldrich             | #SAB4503874             | rabbit         |                            | 1:1000                 |
| ERK                                             | Cell Signaling Technology | #9102                   | rabbit         |                            | 1:1200                 |
| p38                                             | Cell Signaling Technology | #9212                   | rabbit         |                            | 1:1000                 |
| Jnk1                                            | Cell Signaling Technology | #3708                   | rabbit         |                            | 1:1000                 |
| cJun                                            | Cell Signaling Technology | #9165                   | rabbit         |                            | 1:1200                 |
| GR                                              | Proteintech               | #24050-1-AP             | rabbit         |                            | 1:10'000               |
| GFAP                                            | Sigma-Aldrich             | #G3893                  | mouse          | 1:1000                     |                        |
| Iba1                                            | Synaptic system           | #234003                 | rabbit         | 1:500                      |                        |
| Myc-Tag                                         | Cell Signaling Technology | #2276                   | mouse          |                            | 1:5000                 |
| $\beta$ -Actin                                  | Cell Signaling Technology | #4970                   | rabbit         |                            | 1:10'000               |
| GAPDH                                           | Santa Cruz Biotechnology  | #sc-166545              | mouse          |                            | 1:10'000               |
|                                                 |                           |                         |                |                            |                        |
| anti-rabbit IgG-HRP                             | Santa Cruz Biotechnology  | #sc-2004                | goat           |                            | 1:10'000               |
| anti-mouse IgG-HRP                              | Santa Cruz Biotechnology  | #sc-2318                | donkey         |                            | 1:10'000               |
| anti-rabbit IgG antibody (H+L),<br>biotinylated | Vector Biolab             | #BA-1000                | goat           | 1:400                      |                        |
| anti-mouse Alexa Fluor 568                      | Thermo Fisher Scientific  | #A10037                 | goat           | 1:400                      |                        |
| anti-rabbit Alexa Fluor 488                     | Thermo Fisher Scientific  | #A11008                 | goat           | 1:400                      |                        |

**Supplemental Table 5: TaqMan probes for gene expression analysis (Applied Biosystems, Darmstadt, Germany).**

| <b>Gene Name</b> | <b>TaqMan Probe</b> |
|------------------|---------------------|
| Mm_Acth          | Mm00435874_m1       |
| Mm_Avp           | Mm00437761_g1       |
| Mm_Crh           | Mm01293920_s1       |
| Mm_Crhr1         | Mm00432670_m1       |
| Mm_Cyp11b1       | Mm01204952_m1       |
| Mm_Dusp8         | Mm01158980_m1       |
| Mm_G6pc          | Mm00839363_m1       |
| Mm_Gck           | Mm00439129_m1       |
| Mm_Hprt          | Mm01545399_m1       |
| Mm_Hsd11b1       | Mm00476182_m1       |
| Mm_Hsp90aa1      | Mm00658568_gH       |
| Mm_Hspal1        | Mm01159846_s1       |
| Mm_Nr3c1         | Mm00433832_m1       |
| Mm_Oxt           | Mm00726655_s1       |
| Mm_Pck1          | Mm01247058_m1       |
| Mm_Per1          | Mm00501813_m1       |
| Mm_Pfkm          | Mm00445453_m1       |
| Mm_Pgk1          | Mm00435617_m1       |
| Mm_Pkm2          | Mm00834102_gH       |
| Mm_Pygm          | Mm00478582_m1       |
| Mm_Rpl127        | Mm01245874_g1       |
| Mm_Slc2a1        | Mm00441480_m1       |
| Mm_StAR          | Mm00441558_m1       |
| Mm_Tsc22d3       | Mm00726417_s1       |

**Supplemental Table 6: Primer for gene expression analysis.**

| <b>Gene Name</b> | <b>Primer fwd</b>        | <b>Primer rev</b>        |
|------------------|--------------------------|--------------------------|
| Mm_Agl           | GAGAGTGACCGAGCTAGGAAC    | GCAACCAACGAACAGCAGATT    |
| Mm_Cd68          | CTTCCCACAGGCAGCACAG      | AATGATGAGAGGCAGCAAGAGG   |
| Mm_Dusp8         | TCACCTCTACCTGGGCTCTC     | CACAAACCTGTATGCGTCGT     |
| Mm_Emr1          | AATCGCTGCTGGTTGAATACAG   | CCAGGCAAGGAGGACAGAGTT    |
| Mm_G6PT          | GGCTACGGCTACTATCGCAC     | AGGAGGGCATGACAAAGGAGA    |
| Mm_Gaa           | GGGCCTGCACCCTTATCTC      | GAGGTCGGTACGTCTTCCAC     |
| Mm_GBE-1         | TTCTGACGCAGCGGAGTATG     | GCCACTCGGCTTGGAAATGT     |
| Mm_Gyg1          | TGGAGTCTTTGTCTATCAACCTT  | TTGCCAGCCACTAAAATATGT    |
| Mm_Gys1          | CCAGATAGTAGTTGTCACCCCAT  | GAACGCAGTGATTTTCGAGG     |
| Mm_Gys2          | ACCAAGGCCAAAACGACAG      | GGGCTCACATTGTTCTACTTGA   |
| Mm_Hk            | GTGTGCTCCGAGTAAGGGTG     | GTCCGTAAGCCGTTACACC      |
| Mm_Hprt          | AAGCTTGCTGGTGAAAAGGA     | TTGCGCTCATCTTAGGCTTT     |
| Mm_Ikbb          | GGCACCTGGATGACCTAGA      | CCATCTCCTGGCTGTCACCT     |
| Mm_Il1b          | TACAAGGAGAACCAAGCAACGAC  | GATCCACACTCTCCAGCTGCA    |
| Mm_Il6           | GTGGCTAAGGACCAAGACCA     | GGTTTGCCGAGTAGACCTCA     |
| Mm_Nfkb1a        | TGCCTGGCCAGTGTAGCAGTCTT  | CAAAGTCACCAAGTGCTCCACGAT |
| Mm_Pgm2          | AGTGAAGACGCAGGCATATCC    | GGCTCCACGGTAGAGACGA      |
| Mm_Ppib          | GCATCTATGGTGAGCGCTTC     | CTCCACCTTCCGTACCACAT     |
| Mm_Pygl          | GAGAAGCGACGGCAGATCAG     | CTTGACCAGAGTGAAGTGCAG    |
| Mm_Tnfa          | CATCTTCTCAAATTCGAGTGACAA | TGGGAGTAGACAAGGTACAACCC  |
|                  |                          |                          |
| Hs_Dusp8         | AGGACACTAACCGCCTCAAG     | AGGCAGACTTGATGTCCAGG     |
| Hs_GAPDH         | ACCCACTCCTCCACCTTTGA     | CAAAGTGGTCGTTGAGGGCA     |
|                  |                          |                          |
| Mm_Dusp8_WT      | AGTGAGGTCCATCAGTCTGC     | TGGGCATGTCTTCTGACGAC     |
| Mm_Dusp8_KO      | CGCATCGCCTTCTATCGC       | CTCCACCATGCCCTCTTC       |
